# Supplementary material for: Understanding theZselectivity of the metal-free intermolecular aminoarylation of alkynes: a DFT study
Source: Royal Society of Chemistry journal article supplement (doi:10.1039/c8qo01093e), 2018-11-26
Supplement: c8qo01093e1.pdf [file c8qo01093e1.pdf]

## Supporting Information for

### Understanding the *Z* selectivity of the metal-free intermolecular aminoarylation of alkynes: A DFT study

Huining Bai,<sup>a</sup> Huimin Zhang,<sup>a</sup> Yuen Guo,<sup>a</sup> Hui Chen,<sup>b</sup> Donghui Wei,<sup>a</sup> Shijun Li,<sup>a</sup> Yanyan Zhu<sup>a</sup> and  
Wenjing Zhang<sup>\*a</sup>

<sup>a</sup> College of Chemistry and Molecular Engineering, Zhengzhou University, Zhengzhou, Henan  
Province 450001, P. R. China

<sup>b</sup> Institute of Chemistry Henan Academy of Sciences, Zhengzhou 450002, P.R. China

### Contents

|                                                                                                                  |    |
|------------------------------------------------------------------------------------------------------------------|----|
| Part 1: Flexible scanning results from CP1, Int5 and Int8.....                                                   | 2  |
| Part 2: Optimized geometries of all structures involved in Mechanisms I and II.....                              | 4  |
| Part 3: Mechanism of Path b3.....                                                                                | 6  |
| Part 4: The calculated Gibbs free energy profiles of the possible direct cleavage<br>of the C1-S2 bond.....      | 7  |
| Part 5: The Gibbs free energy profiles of the whole reaction going through<br>Mechanism I and Mechanism II. .... | 8  |
| Part 6: Substituent effect studies.....                                                                          | 10 |
| Part 7: Possible reaction mechanisms of allene. ....                                                             | 12 |
| Part 8: List of Cartesian coordinates of all structures involved in this work.....                               | 14 |

Part 1: Flexible scanning results from **CP1**, **Int5** and **Int8**.

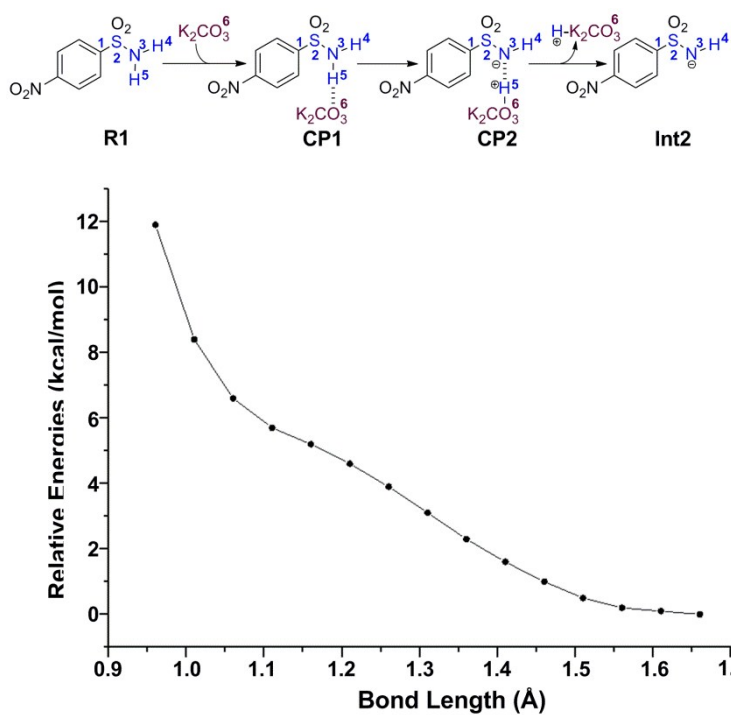

**Figure S1** The flexible scanning curve to the bond length of H5–O6 from the optimized structure of **CP1**.

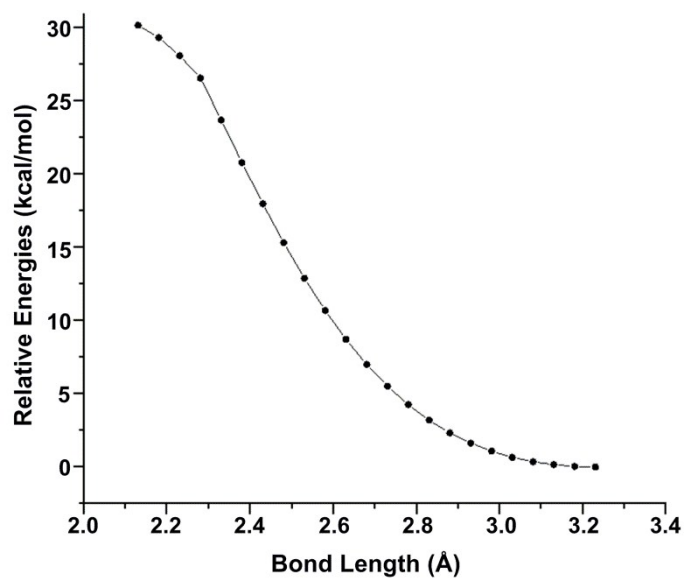

**Figure S2** The flexible scanning curve to the bond length of C1–S2 from the optimized structure of **Int5**

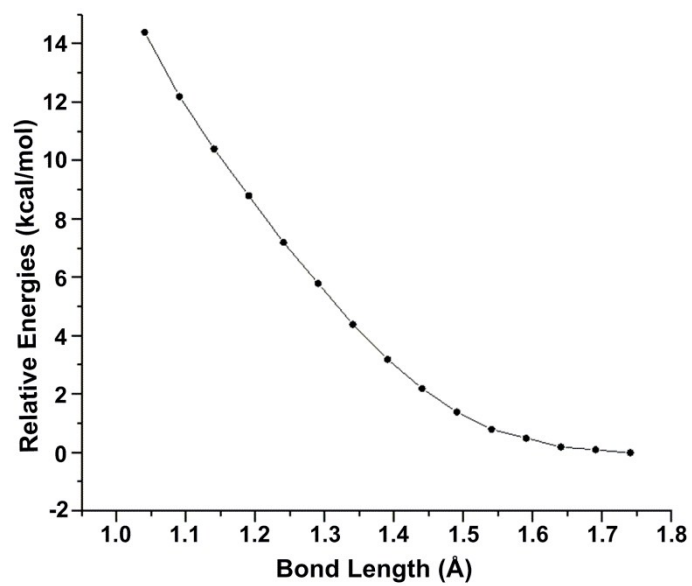

**Figure S3** The flexible scanning curve to the bond length of H4–O6' from the optimized structure of **Int8**

Part 2: Optimized geometries of all structures involved in Mechanisms I and II.

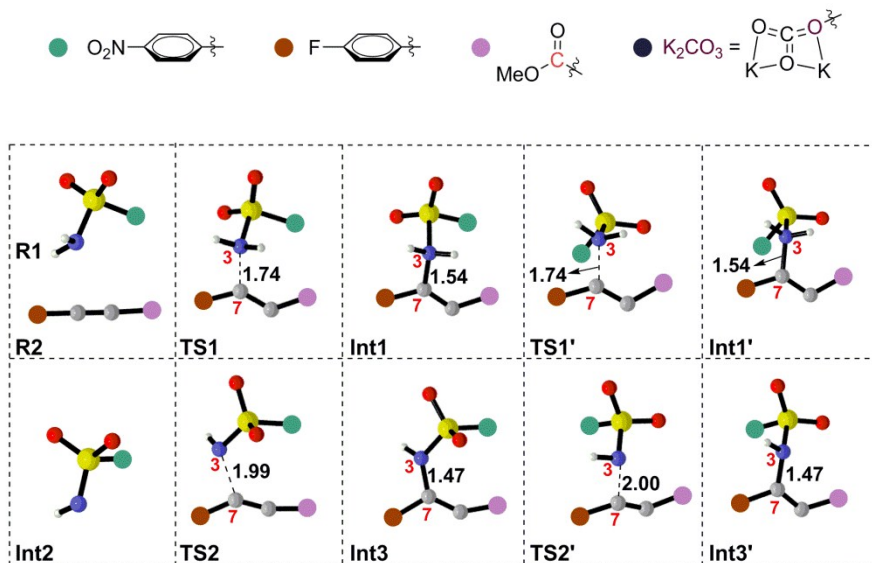

**Figure S4** Optimized geometries of all structures involved in Stage I. All three-dimensional structures are represented using CYLView.<sup>1</sup> Bond lengths in Å. All hydrogen atoms except for these in the reactive center are omitted for brevity.

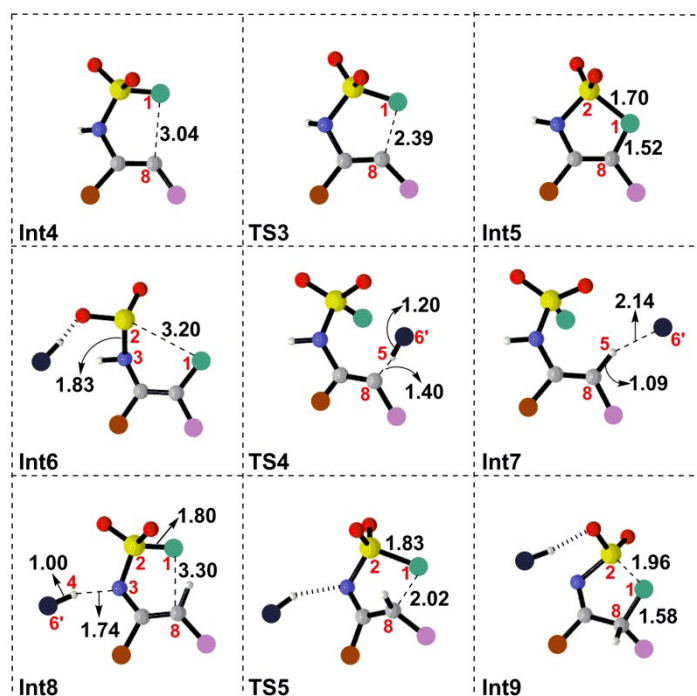

**Figure S5** Optimized geometries of all structures involved in Stage II. All three-dimensional structures are represented using CYLView. Bond lengths in Å. All hydrogen atoms except for these in the reactive center are omitted for brevity.

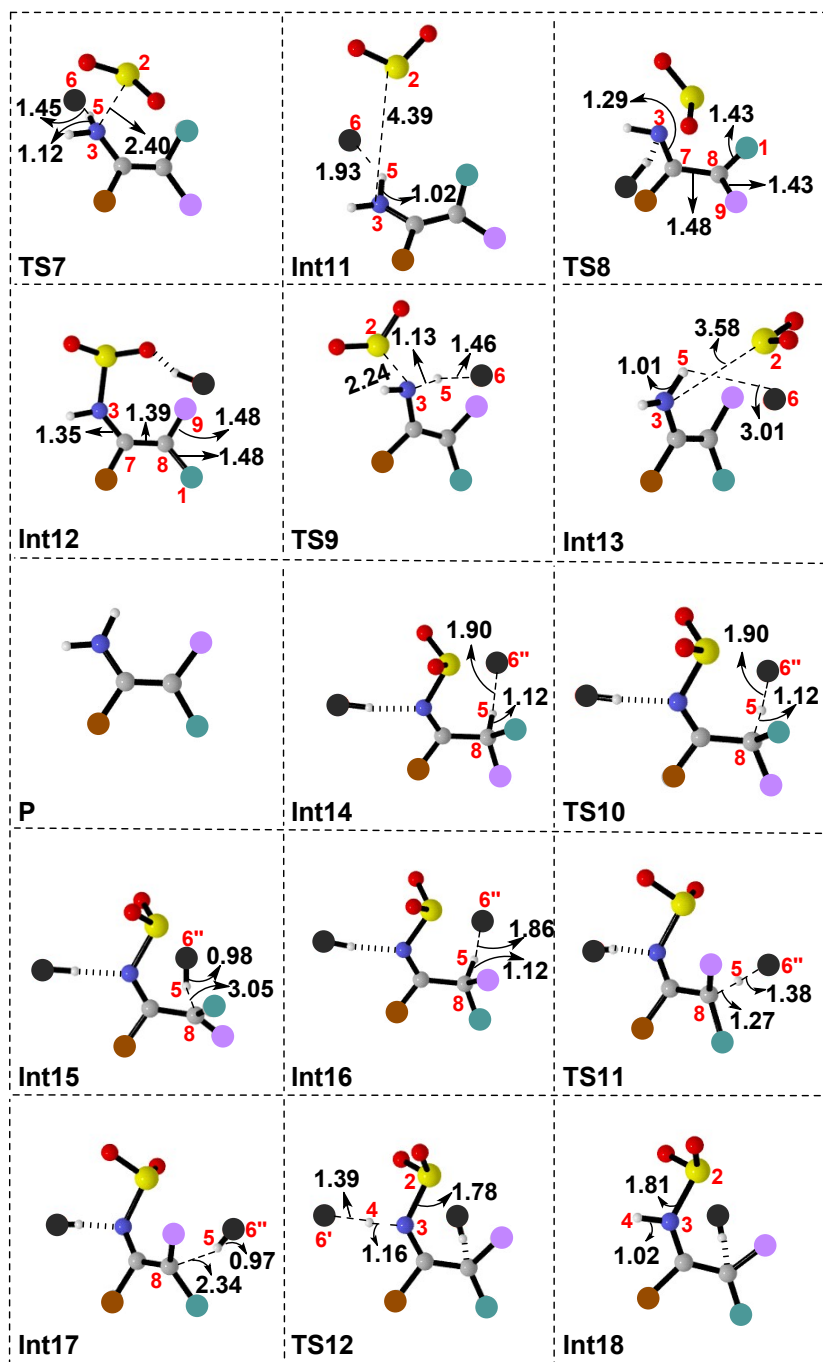

**Figure S6** Optimized geometries of all structures involved in Stage III. All three-dimensional structures are represented using CYLView. Bond lengths in Å. All hydrogen atoms except for these in the reactive center are omitted for brevity.

#### References:

1. C. Y. Legault *Cylview*, 1.0b; (<http://www.cylview.org/>); Université de Sherbrooke, 2009.

Part 3: Mechanism of Path b3.

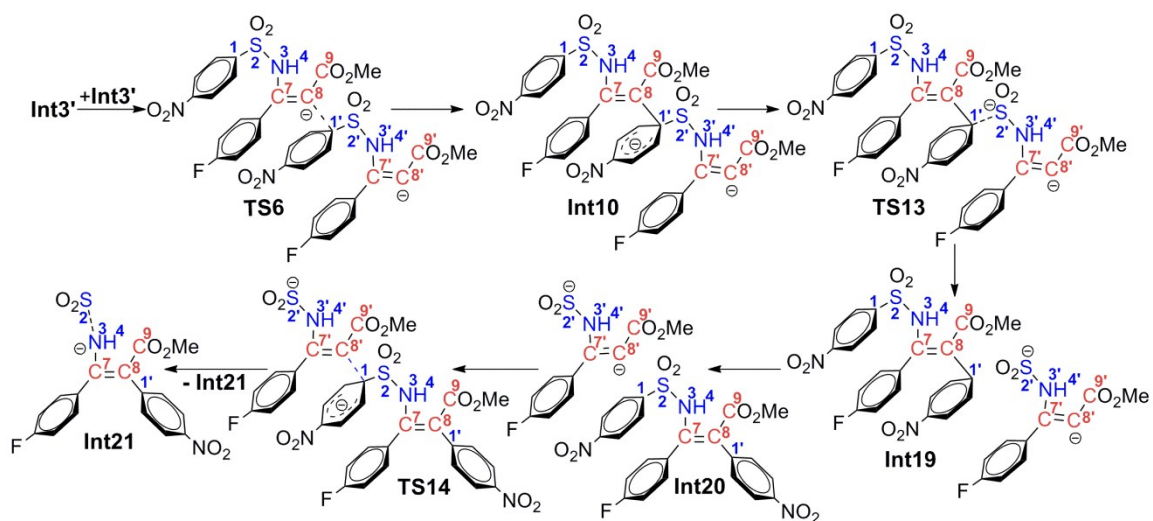

Scheme S1 Proposed mechanism of Path b3.

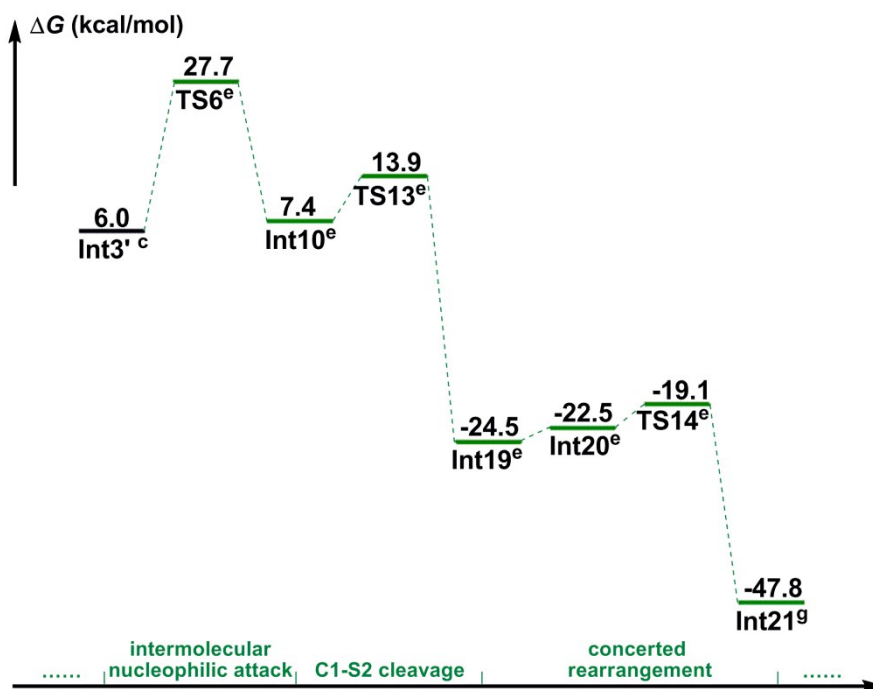

Figure S7 Gibbs free energy profiles of Path b3. Energies

**R1+R2+K<sub>2</sub>CO<sub>3</sub>+Int3'** were set as 0.0 kcal/mol. The superscripts represent adding energies of (b) **R2** + K<sub>2</sub>CO<sub>3</sub> + K<sub>2</sub>CO<sub>3</sub>-H<sup>+</sup>, (c) K<sub>2</sub>CO<sub>3</sub>-H<sup>+</sup> + K<sub>2</sub>CO<sub>3</sub>, (d) K<sub>2</sub>CO<sub>3</sub>, (e) K<sub>2</sub>CO<sub>3</sub>-H<sup>+</sup>, (f) SO<sub>2</sub> + 2 × K<sub>2</sub>CO<sub>3</sub>, (g) K<sub>2</sub>CO<sub>3</sub>-H<sup>+</sup> + **Int3**.

Part 4: The calculated Gibbs free energy profiles of the possible direct cleavage of the C1-S2 bond.

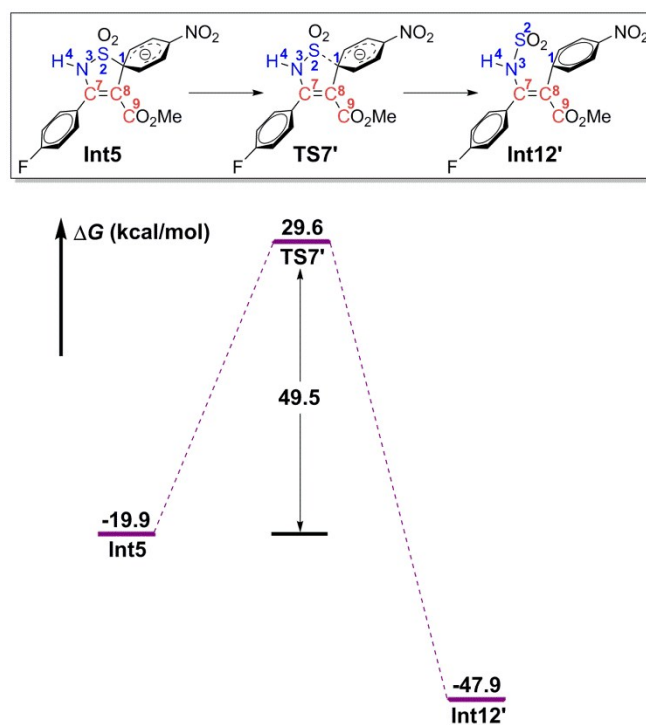

**Figure S8** The calculated Gibbs free energy profiles of the possible direct cleavage of the C1-S2 bond.

Part 5: The Gibbs free energy profiles of the whole reaction going through Mechanism I and Mechanism II.

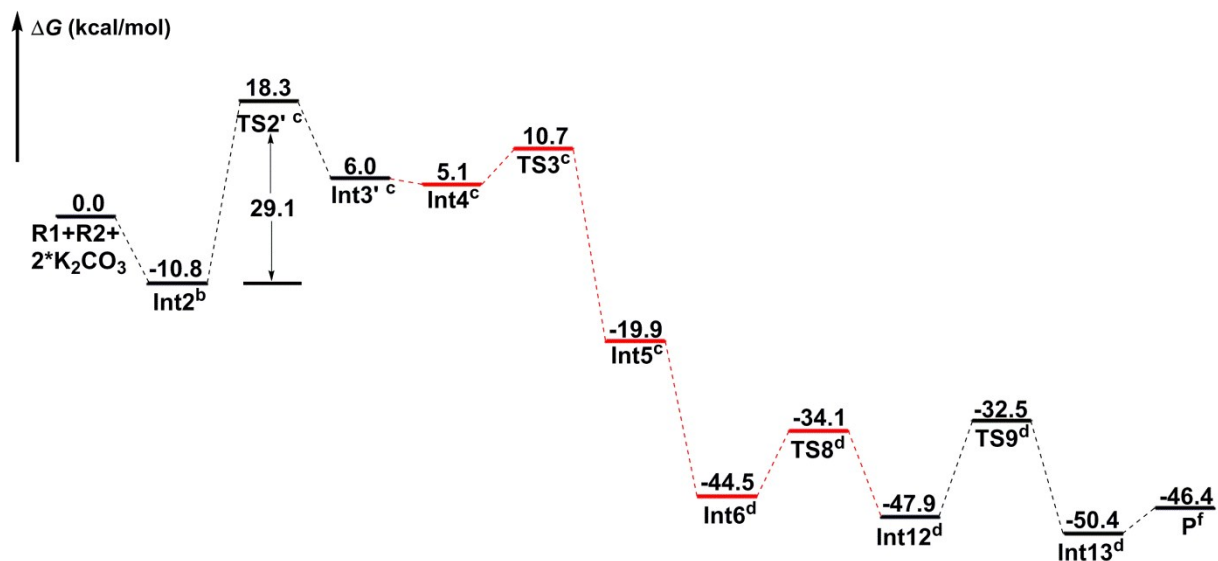

**Figure S9** Gibbs free energy profiles of the whole reaction going through Mechanism I. The superscripts represent adding energies of (b)  $\mathbf{R2} + \mathbf{K_2CO_3} + \mathbf{K_2CO_3-H^+}$ , (c)  $\mathbf{K_2CO_3-H^+} + \mathbf{K_2CO_3}$ , (d)  $\mathbf{K_2CO_3}$ , (e)  $\mathbf{K_2CO_3-H^+}$ , (f)  $\mathbf{SO_2} + 2 \times \mathbf{K_2CO_3}$ .



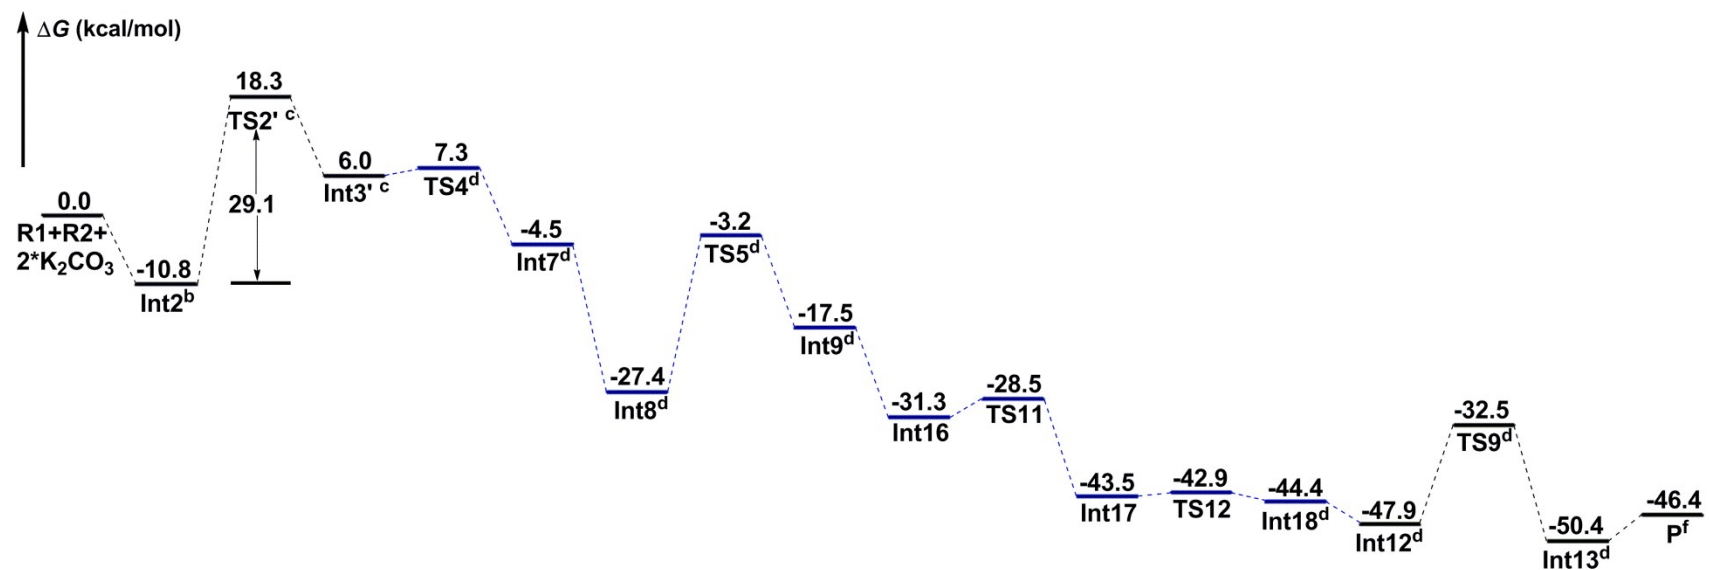

**Figure S10** Gibbs free energy profiles of the whole reaction going through Mechanism II. The superscripts represent adding energies of (b)  $\mathbf{R2} + \mathbf{K}_2\mathbf{CO}_3 + \mathbf{K}_2\mathbf{CO}_3\text{-H}^+$ , (c)  $\mathbf{K}_2\mathbf{CO}_3\text{-H}^+ + \mathbf{K}_2\mathbf{CO}_3$ , (d)  $\mathbf{K}_2\mathbf{CO}_3$ , (e)  $\mathbf{K}_2\mathbf{CO}_3\text{-H}^+$ , (f)  $\mathbf{SO}_2 + 2 \times \mathbf{K}_2\mathbf{CO}_3$ .

## Part 6: Substituent effect studies.

Based on the experimental results, we selected three sulfonamides (denoted as **R1<sup>a</sup>**, **R1<sup>b</sup>**, **R1<sup>c</sup>**, as shown in Scheme S2) to check whether the novel mechanism we newly proposed or the Similes rearrangement mechanism is more favorable. Accordingly, the transformation of the anionic adduct **Int3'** through Paths b1 and b2 was calculated. All calculated results were listed in Table S1. As we can see, the energy barriers of the nucleophilic attack reaction via **TS3<sup>a</sup>**, **TS3<sup>b</sup>** and **TS3<sup>c</sup>** are 5.9, 6.8, and 6.9 kcal/mol, respectively, while the protonation of the carbon anion via **TS4s** are all barrierless since the  $\Delta G$  are all negative. That's to say, for no matter the triply chlorinated sulfonamide (**R1<sup>a</sup>**), the electron-deficient group (**R1<sup>b</sup>**), or even the heteroaryl substrate (**R1<sup>c</sup>**), Path b2 is always more favorable over Path b1. Therefore, we have one more reason to believe that the conclusion that the title reaction is more likely to occur through the novel mechanism we proposed should be reliable to be extrapolated to other groups, at least those reported by Greaney (*Angew. Chem. Int. Ed.*, 2017, **56**, 4183).

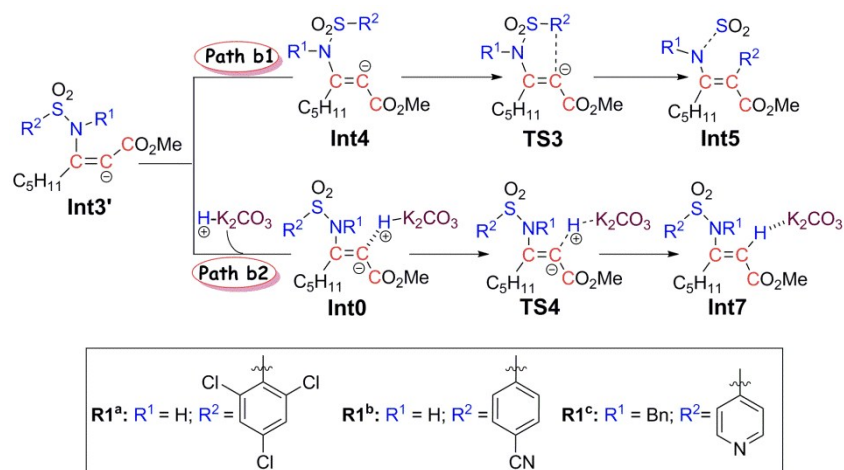

**Scheme S2** Details of further transformation of **Int3'** through Paths b1 and b2 with the sulfonamides being **R1<sup>a</sup>**, **R1<sup>b</sup>** and **R1<sup>c</sup>**.

**Table S1** The relative Gibbs free energies and corresponding barriers of reactions of selected substrates through Paths b1 and b2. (Unit: kcal/mol)

| Sulfonamide<br>substrates | Path b1      |             |            |              |            | Path b2      |             |            |             |            |
|---------------------------|--------------|-------------|------------|--------------|------------|--------------|-------------|------------|-------------|------------|
|                           | <b>Int3'</b> | <b>Int4</b> | <b>TS3</b> | <b>Int5'</b> | $\Delta G$ | <b>Int3'</b> | <b>Int0</b> | <b>TS4</b> | <b>Int7</b> | $\Delta G$ |
| <b>R1<sup>a</sup></b>     | 0.0          | -3.2        | 2.7        | -70.9        | 5.9        | 0.0          | -0.6        | -0.8       | -11.7       | -0.2       |
| <b>R1<sup>b</sup></b>     | 0.0          | -1.4        | 5.4        | -57.0        | 6.8        | 0.0          | -2.1        | -3.1       | -11.8       | -1.0       |
| <b>R1<sup>c</sup></b>     | 0.0          | -5.2        | 1.7        | -60.5        | 6.9        | 0.0          | -1.5        | -2.8       | -12.3       | -1.3       |

## Part 7: Possible reaction mechanisms of allene.

Although the basic processes are similar, there are much more detailed issues that need to be addressed for the reaction of allene before we can get thorough understanding to the mechanism and stereoselectivities. As shown in the Scheme S3, for example, does the anionic addition prefer to give intermediate **I** in *Z* or in *E* geometry? Will the nucleophilic attack (Paths A & B, Smiles rearrangement) or the protonation of the C3 atom (Path C, the novel mechanism we proposed) follows up? Whether the reaction is enantioselective or not? If yes, what's the origin of the selectivity? How should the proton transfer being accomplished in Path C? Therefore, to absolutely make clear the mechanism and the stereoselectivity of the aminoarylation of allene is really a complicated work which is far beyond the scope of our current study. Nonetheless, we have carried out some brief calculations to address whether the Similes rearrangement or the novel mechanism we proposed is more possible to occur.

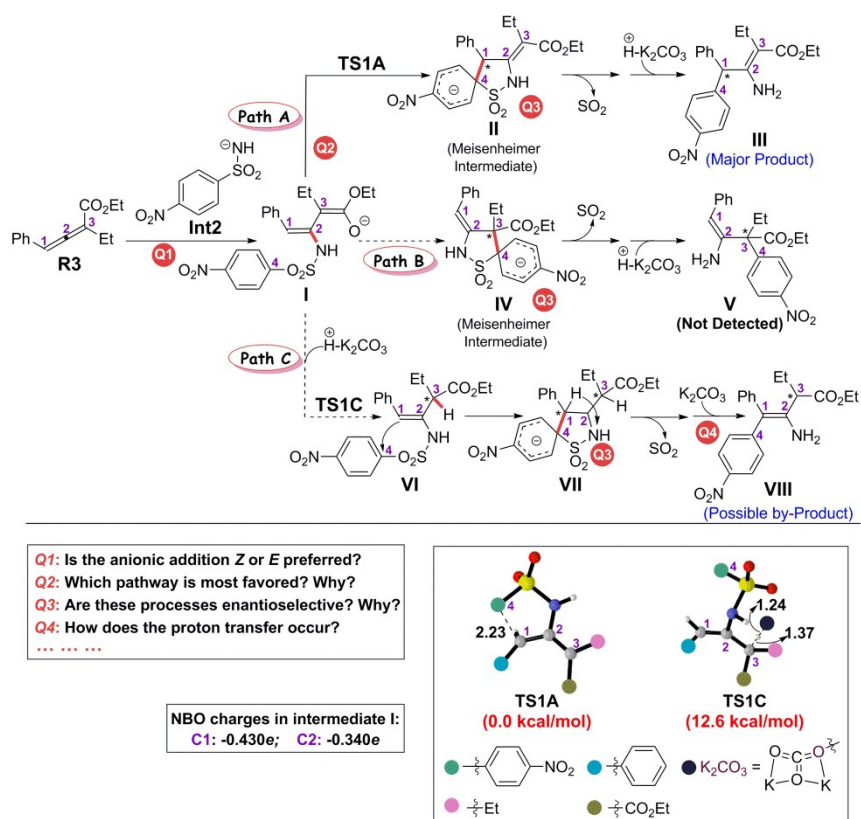

**Scheme S3** Possible reaction mechanisms of allene, NBO charges in intermediate **I**, and the optimized geometries of **TS1A** and **TS1C**.

As it is shown, given the anionic adduct **I**, the Meisenheimer intermediate is possible to be formed by nucleophilic attack of the C1 (Path A) or the C3 atom (Path A) to the C4 atom, determined by which one is more nucleophilic. The NBO analysis disclosed that the C1 atom (-0.430 *e*) is obviously more negative than the C3 atom (-0.340 *e*), which helps to reasonably exclude Path B. In regarding Path A and Path C, we have calculated the transition states **TS1A** and **TS1C** which corresponds to formation of Meisenheimer intermediate **II** and the protonation of the C3 atom, respectively. The results reveal that the energy barrier via **TS1A** is 12.6 kcal/mol higher than that via **TS1C**, indicating the Smiles rearrangement mechanism is more favorable for the reaction of allene. All these results are in good agreement with the experimental fact that **III** is the main product. However, for the tentative by-product **VIII**, we still have no idea about whether it is formed through Path C or the isomerization of the major product **III**.

Part 8: List of Cartesian coordinates of all structures involved in this work

**R1**

---

| Center<br>Number | Atomic<br>Number | Atomic<br>Type | Coordinates (Angstroms) |           |           |
|------------------|------------------|----------------|-------------------------|-----------|-----------|
|                  |                  |                | X                       | Y         | Z         |
| 1                | 6                | 0              | -1.320987               | -1.219482 | -0.038432 |
| 2                | 6                | 0              | 0.067395                | -1.202248 | -0.073960 |
| 3                | 6                | 0              | 0.725096                | 0.026467  | -0.073854 |
| 4                | 6                | 0              | 0.045823                | 1.239381  | -0.043145 |
| 5                | 6                | 0              | -1.346097               | 1.228079  | -0.006754 |
| 6                | 6                | 0              | -1.991246               | -0.000913 | -0.004028 |
| 7                | 1                | 0              | -1.874280               | -2.149966 | -0.039621 |
| 8                | 1                | 0              | 0.630031                | -2.129022 | -0.106764 |
| 9                | 1                | 0              | 0.593518                | 2.174743  | -0.055398 |
| 10               | 1                | 0              | -1.916602               | 2.147842  | 0.016030  |
| 11               | 7                | 0              | -3.465330               | -0.015798 | 0.031528  |
| 12               | 8                | 0              | -4.044730               | 1.055629  | 0.063079  |
| 13               | 8                | 0              | -4.023104               | -1.099106 | 0.027857  |
| 14               | 16               | 0              | 2.509542                | 0.033042  | -0.115398 |
| 15               | 8                | 0              | 2.925382                | 1.390698  | -0.453635 |
| 16               | 8                | 0              | 2.954373                | -1.091764 | -0.932546 |
| 17               | 7                | 0              | 2.907168                | -0.351603 | 1.444638  |
| 18               | 1                | 0              | 3.735880                | -0.942669 | 1.466855  |
| 19               | 1                | 0              | 3.010636                | 0.470843  | 2.035096  |

---

**R2**

---

| Center<br>Number | Atomic<br>Number | Atomic<br>Type | Coordinates (Angstroms) |           |           |
|------------------|------------------|----------------|-------------------------|-----------|-----------|
|                  |                  |                | X                       | Y         | Z         |
| 1                | 6                | 0              | 1.687398                | 0.224242  | 0.000089  |
| 2                | 6                | 0              | 0.478493                | 0.154135  | -0.000017 |
| 3                | 6                | 0              | -0.950058               | 0.066731  | -0.000004 |
| 4                | 6                | 0              | -1.576761               | -1.189808 | -0.000068 |
| 5                | 6                | 0              | -1.725756               | 1.237138  | 0.000053  |
| 6                | 6                | 0              | -2.963301               | -1.279771 | -0.000074 |
| 7                | 1                | 0              | -0.973382               | -2.090921 | -0.000115 |
| 8                | 6                | 0              | -3.112956               | 1.156711  | 0.000051  |
| 9                | 1                | 0              | -1.237495               | 2.205497  | 0.000098  |
| 10               | 6                | 0              | -3.697383               | -0.102059 | -0.000013 |

---

|    |   |   |           |           |           |
|----|---|---|-----------|-----------|-----------|
| 11 | 1 | 0 | -3.472751 | -2.236407 | -0.000125 |
| 12 | 1 | 0 | -3.735747 | 2.043756  | 0.000096  |
| 13 | 9 | 0 | -5.042497 | -0.184875 | -0.000018 |
| 14 | 6 | 0 | 3.129204  | 0.365786  | 0.000166  |
| 15 | 8 | 0 | 3.704733  | 1.433439  | -0.000214 |
| 16 | 8 | 0 | 3.740493  | -0.818760 | 0.000337  |
| 17 | 6 | 0 | 5.176945  | -0.774113 | -0.000175 |
| 18 | 1 | 0 | 5.498069  | -1.812650 | -0.002175 |
| 19 | 1 | 0 | 5.533200  | -0.256727 | -0.892069 |
| 20 | 1 | 0 | 5.533827  | -0.260065 | 0.893424  |

---

### SO<sub>2</sub>

| Center<br>Number | Atomic<br>Number | Atomic<br>Type | Coordinates (Angstroms) |           |          |
|------------------|------------------|----------------|-------------------------|-----------|----------|
|                  |                  |                | X                       | Y         | Z        |
| 1                | 16               | 0              | 0.000000                | 0.379682  | 0.000000 |
| 2                | 8                | 0              | 1.235298                | -0.379677 | 0.000000 |
| 3                | 8                | 0              | -1.235298               | -0.379687 | 0.000000 |

---

### K<sub>2</sub>CO<sub>3</sub>

| Center<br>Number | Atomic<br>Number | Atomic<br>Type | Coordinates (Angstroms) |           |           |
|------------------|------------------|----------------|-------------------------|-----------|-----------|
|                  |                  |                | X                       | Y         | Z         |
| 1                | 6                | 0              | 0.000001                | 0.857837  | 0.000406  |
| 2                | 8                | 0              | 1.125009                | 1.488414  | 0.014873  |
| 3                | 8                | 0              | -0.000139               | -0.449329 | 0.001498  |
| 4                | 8                | 0              | -1.124865               | 1.488585  | -0.015239 |
| 5                | 19               | 0              | 2.616168                | -0.667596 | -0.003028 |
| 6                | 19               | 0              | -2.616170               | -0.667582 | 0.002423  |

---

### K<sub>2</sub>CO<sub>3</sub>-H<sup>+</sup>

| Center<br>Number | Atomic<br>Number | Atomic<br>Type | Coordinates (Angstroms) |           |          |
|------------------|------------------|----------------|-------------------------|-----------|----------|
|                  |                  |                | X                       | Y         | Z        |
| 1                | 1                | 0              | -0.927010               | 2.444378  | 0.000254 |
| 2                | 6                | 0              | 0.101614                | 0.823635  | 0.000225 |
| 3                | 8                | 0              | -1.109976               | 1.494881  | 0.000664 |
| 4                | 8                | 0              | -0.013268               | -0.425283 | 0.001126 |

|   |    |   |           |           |           |
|---|----|---|-----------|-----------|-----------|
| 5 | 8  | 0 | 1.141567  | 1.510243  | -0.000982 |
| 6 | 19 | 0 | -2.677182 | -0.750515 | -0.000361 |
| 7 | 19 | 0 | 2.686168  | -0.724481 | -0.000064 |

---

## TS1

---

| Center<br>Number | Atomic<br>Number | Atomic<br>Type | Coordinates (Angstroms) |           |           |
|------------------|------------------|----------------|-------------------------|-----------|-----------|
|                  |                  |                | X                       | Y         | Z         |
| 1                | 6                | 0              | -3.594863               | -0.616599 | -0.092139 |
| 2                | 6                | 0              | -2.475255               | -1.406961 | 0.144040  |
| 3                | 6                | 0              | -1.205531               | -0.093824 | -1.493871 |
| 4                | 6                | 0              | -2.325197               | 0.694684  | -1.727020 |
| 5                | 6                | 0              | -3.485355               | 0.411471  | -1.017912 |
| 6                | 1                | 0              | -4.528321               | -0.793141 | 0.427148  |
| 7                | 1                | 0              | -2.511778               | -2.230969 | 0.848705  |
| 8                | 1                | 0              | -0.279051               | 0.082438  | -2.029376 |
| 9                | 1                | 0              | -2.300625               | 1.510033  | -2.438516 |
| 10               | 7                | 0              | -4.670944               | 1.259204  | -1.258200 |
| 11               | 8                | 0              | -5.679334               | 1.016814  | -0.619965 |
| 12               | 8                | 0              | -4.571436               | 2.152428  | -2.079644 |
| 13               | 6                | 0              | -1.306701               | -1.121382 | -0.557626 |
| 14               | 6                | 0              | 0.546771                | 1.323986  | 1.074229  |
| 15               | 6                | 0              | 1.417718                | 0.454053  | 0.688934  |
| 16               | 6                | 0              | -0.759838               | 1.118699  | 1.647437  |
| 17               | 8                | 0              | -1.798962               | 1.653023  | 1.300478  |
| 18               | 8                | 0              | -0.730023               | 0.244916  | 2.699003  |
| 19               | 6                | 0              | -1.951518               | 0.108908  | 3.438465  |
| 20               | 1                | 0              | -2.237007               | 1.071294  | 3.867116  |
| 21               | 1                | 0              | -2.752303               | -0.252062 | 2.790308  |
| 22               | 1                | 0              | -1.740520               | -0.612439 | 4.225238  |
| 23               | 6                | 0              | 2.809315                | 0.528925  | 0.211057  |
| 24               | 6                | 0              | 3.463533                | -0.480137 | -0.504676 |
| 25               | 6                | 0              | 3.508015                | 1.715315  | 0.496326  |
| 26               | 6                | 0              | 4.782940                | -0.318210 | -0.926449 |
| 27               | 1                | 0              | 2.951035                | -1.394830 | -0.778700 |
| 28               | 6                | 0              | 4.821545                | 1.890876  | 0.082679  |
| 29               | 6                | 0              | 5.433866                | 0.863310  | -0.621575 |
| 30               | 1                | 0              | 5.294699                | -1.092878 | -1.486073 |
| 31               | 1                | 0              | 5.369129                | 2.800255  | 0.303486  |
| 32               | 9                | 0              | 6.713285                | 1.026151  | -1.024813 |
| 33               | 7                | 0              | 1.012655                | -1.246388 | 0.916355  |
| 34               | 16               | 0              | 0.104154                | -2.155422 | -0.288997 |



|    |   |   |           |           |           |
|----|---|---|-----------|-----------|-----------|
| 35 | 8 | 0 | 0.945363  | -2.161856 | -1.469556 |
| 36 | 8 | 0 | -0.306378 | -3.387629 | 0.357157  |
| 37 | 1 | 0 | 3.003303  | 2.498999  | 1.050197  |
| 38 | 1 | 0 | 1.855695  | -1.796722 | 1.130127  |
| 39 | 1 | 0 | 0.447230  | -1.208549 | 1.779336  |

---

### Int1

| Center<br>Number | Atomic<br>Number | Atomic<br>Type | Coordinates (Angstroms) |           |           |
|------------------|------------------|----------------|-------------------------|-----------|-----------|
|                  |                  |                | X                       | Y         | Z         |
| 1                | 6                | 0              | 3.564100                | 0.636903  | -0.196302 |
| 2                | 6                | 0              | 2.439823                | 1.439897  | -0.048902 |
| 3                | 6                | 0              | 1.166559                | -0.087690 | -1.501978 |
| 4                | 6                | 0              | 2.297998                | -0.886893 | -1.636191 |
| 5                | 6                | 0              | 3.456299                | -0.499361 | -0.984219 |
| 6                | 1                | 0              | 4.502937                | 0.884028  | 0.281909  |
| 7                | 1                | 0              | 2.475282                | 2.347813  | 0.543237  |
| 8                | 1                | 0              | 0.241463                | -0.336874 | -1.998121 |
| 9                | 1                | 0              | 2.279743                | -1.785035 | -2.233234 |
| 10               | 7                | 0              | 4.647576                | -1.355882 | -1.132973 |
| 11               | 8                | 0              | 5.661617                | -1.018358 | -0.551722 |
| 12               | 8                | 0              | 4.545388                | -2.349262 | -1.827567 |
| 13               | 6                | 0              | 1.278899                | 1.051513  | -0.712209 |
| 14               | 6                | 0              | -0.569258               | -1.194868 | 1.208903  |
| 15               | 6                | 0              | -1.315131               | -0.044447 | 0.769352  |
| 16               | 6                | 0              | 0.757257                | -0.890406 | 1.715110  |
| 17               | 8                | 0              | 1.811252                | -1.439868 | 1.428346  |
| 18               | 8                | 0              | 0.760604                | 0.048809  | 2.746830  |
| 19               | 6                | 0              | 2.004521                | 0.240705  | 3.421717  |
| 20               | 1                | 0              | 2.330737                | -0.687488 | 3.889780  |
| 21               | 1                | 0              | 2.776953                | 0.566146  | 2.718368  |
| 22               | 1                | 0              | 1.828523                | 1.009647  | 4.172715  |
| 23               | 6                | 0              | -2.742606               | -0.427650 | 0.301412  |
| 24               | 6                | 0              | -3.534489               | 0.548074  | -0.326619 |
| 25               | 6                | 0              | -3.334391               | -1.695788 | 0.487204  |
| 26               | 6                | 0              | -4.841407               | 0.306035  | -0.735054 |
| 27               | 1                | 0              | -3.139553               | 1.537638  | -0.545936 |
| 28               | 6                | 0              | -4.645117               | -1.961990 | 0.085248  |
| 29               | 6                | 0              | -5.383856               | -0.946833 | -0.513824 |
| 30               | 1                | 0              | -5.433916               | 1.073079  | -1.215053 |
| 31               | 1                | 0              | -5.093821               | -2.932652 | 0.236056  |
| 32               | 9                | 0              | -6.655621               | -1.180484 | -0.904359 |

|    |    |   |           |           |           |
|----|----|---|-----------|-----------|-----------|
| 33 | 7  | 0 | -1.010253 | 1.068907  | 0.883309  |
| 34 | 16 | 0 | -0.144315 | 2.062525  | -0.557606 |
| 35 | 8  | 0 | -1.057923 | 1.886157  | -1.648617 |
| 36 | 8  | 0 | 0.187151  | 3.352829  | -0.001960 |
| 37 | 1  | 0 | -2.730476 | -2.469598 | 0.957140  |
| 38 | 1  | 0 | -1.865610 | 1.623973  | 1.095476  |
| 39 | 1  | 0 | -0.366421 | 1.224049  | 1.700573  |

---

**TS1'**

---

| Center<br>Number | Atomic<br>Number | Atomic<br>Type | Coordinates (Angstroms) |           |           |
|------------------|------------------|----------------|-------------------------|-----------|-----------|
|                  |                  |                | X                       | Y         | Z         |
| 1                | 6                | 0              | 1.077438                | -2.161309 | -0.679017 |
| 2                | 6                | 0              | -0.159893               | -1.793698 | -0.160418 |
| 3                | 6                | 0              | 0.959297                | -0.705446 | 1.730433  |
| 4                | 6                | 0              | 2.196145                | -1.056654 | 1.201855  |
| 5                | 6                | 0              | 2.218260                | -1.772205 | 0.010699  |
| 6                | 1                | 0              | 1.157208                | -2.719203 | -1.603355 |
| 7                | 1                | 0              | -1.081252               | -2.049614 | -0.672749 |
| 8                | 1                | 0              | 0.892792                | -0.154209 | 2.662533  |
| 9                | 1                | 0              | 3.119051                | -0.783603 | 1.697747  |
| 10               | 7                | 0              | 3.532825                | -2.119404 | -0.566901 |
| 11               | 8                | 0              | 3.545670                | -2.770339 | -1.595850 |
| 12               | 8                | 0              | 4.527647                | -1.727185 | 0.015560  |
| 13               | 6                | 0              | -0.187360               | -1.071779 | 1.029108  |
| 14               | 6                | 0              | -2.040376               | 1.086541  | -1.531845 |
| 15               | 6                | 0              | -1.217876               | 1.353383  | -0.571928 |
| 16               | 6                | 0              | -3.393092               | 0.631044  | -1.298198 |
| 17               | 8                | 0              | -4.218125               | 1.211359  | -0.592169 |
| 18               | 8                | 0              | -3.683316               | -0.509487 | -1.939113 |
| 19               | 6                | 0              | 0.196821                | 1.734706  | -0.450094 |
| 20               | 6                | 0              | 1.094027                | 1.200857  | -1.387338 |
| 21               | 6                | 0              | 0.687007                | 2.599528  | 0.538152  |
| 22               | 6                | 0              | 2.450849                | 1.502246  | -1.333224 |
| 23               | 1                | 0              | 0.715237                | 0.534697  | -2.155576 |
| 24               | 6                | 0              | 2.042431                | 2.907507  | 0.610104  |
| 25               | 6                | 0              | 2.896594                | 2.342283  | -0.324014 |
| 26               | 1                | 0              | 3.154931                | 1.087277  | -2.046577 |
| 27               | 1                | 0              | 2.432484                | 3.575991  | 1.368987  |
| 28               | 9                | 0              | 4.213639                | 2.627529  | -0.252729 |
| 29               | 7                | 0              | -1.847161               | 1.104128  | 1.064727  |
| 30               | 16               | 0              | -1.761935               | -0.546289 | 1.651293  |

|    |   |   |           |           |           |
|----|---|---|-----------|-----------|-----------|
| 31 | 8 | 0 | -1.721460 | -0.471401 | 3.098755  |
| 32 | 8 | 0 | -2.822960 | -1.233212 | 0.941402  |
| 33 | 1 | 0 | 0.020576  | 3.071596  | 1.253355  |
| 34 | 1 | 0 | -1.454536 | 1.727577  | 1.775765  |
| 35 | 6 | 0 | -4.961881 | -1.083306 | -1.642005 |
| 36 | 1 | 0 | -5.761690 | -0.411503 | -1.958281 |
| 37 | 1 | 0 | -5.002124 | -2.014238 | -2.203773 |
| 38 | 1 | 0 | -5.043684 | -1.276502 | -0.570603 |
| 39 | 1 | 0 | -2.850430 | 1.331458  | 0.939308  |

### Int1'

| Center<br>Number | Atomic<br>Number | Atomic<br>Type | Coordinates (Angstroms) |           |           |
|------------------|------------------|----------------|-------------------------|-----------|-----------|
|                  |                  |                | X                       | Y         | Z         |
| 1                | 6                | 0              | 0.888910                | -2.220881 | -0.344418 |
| 2                | 6                | 0              | -0.327587               | -1.729909 | 0.124169  |
| 3                | 6                | 0              | 0.879656                | -0.412376 | 1.821361  |
| 4                | 6                | 0              | 2.083402                | -0.883614 | 1.328201  |
| 5                | 6                | 0              | 2.051192                | -1.773797 | 0.263435  |
| 6                | 1                | 0              | 0.933503                | -2.915498 | -1.173103 |
| 7                | 1                | 0              | -1.268677               | -2.006349 | -0.339872 |
| 8                | 1                | 0              | 0.844425                | 0.288814  | 2.647184  |
| 9                | 1                | 0              | 3.028653                | -0.572380 | 1.753374  |
| 10               | 7                | 0              | 3.336413                | -2.240671 | -0.286788 |
| 11               | 8                | 0              | 3.308974                | -3.153671 | -1.090033 |
| 12               | 8                | 0              | 4.346487                | -1.675430 | 0.088846  |
| 13               | 6                | 0              | -0.287289               | -0.846001 | 1.194843  |
| 14               | 6                | 0              | -1.825482               | 0.773863  | -1.718782 |
| 15               | 6                | 0              | -1.252370               | 1.262134  | -0.476598 |
| 16               | 6                | 0              | -3.201933               | 0.400906  | -1.434424 |
| 17               | 8                | 0              | -4.121254               | 1.117374  | -0.982751 |
| 18               | 8                | 0              | -3.472723               | -0.883382 | -1.803821 |
| 19               | 6                | 0              | 0.253793                | 1.628716  | -0.634031 |
| 20               | 6                | 0              | 1.134808                | 0.975638  | -1.518854 |
| 21               | 6                | 0              | 0.823741                | 2.556715  | 0.245569  |
| 22               | 6                | 0              | 2.515464                | 1.201189  | -1.483758 |
| 23               | 1                | 0              | 0.710345                | 0.250421  | -2.209977 |
| 24               | 6                | 0              | 2.191515                | 2.801065  | 0.304686  |
| 25               | 6                | 0              | 3.024138                | 2.100465  | -0.553184 |
| 26               | 1                | 0              | 3.198164                | 0.675882  | -2.146794 |
| 27               | 1                | 0              | 2.615788                | 3.521052  | 1.002236  |
| 28               | 9                | 0              | 4.352063                | 2.310194  | -0.472837 |

|    |    |   |           |           |           |
|----|----|---|-----------|-----------|-----------|
| 29 | 7  | 0 | -1.768448 | 1.390691  | 0.488143  |
| 30 | 16 | 0 | -1.809459 | -0.147428 | 1.701124  |
| 31 | 8  | 0 | -1.757000 | 0.359678  | 3.054598  |
| 32 | 8  | 0 | -2.943637 | -0.865806 | 1.187798  |
| 33 | 1  | 0 | 0.205873  | 3.152873  | 0.919829  |
| 34 | 1  | 0 | -1.351346 | 2.181115  | 1.023911  |
| 35 | 6  | 0 | -4.763296 | -1.373556 | -1.453208 |
| 36 | 1  | 0 | -5.546944 | -0.823157 | -1.976337 |
| 37 | 1  | 0 | -4.782026 | -2.424192 | -1.759590 |
| 38 | 1  | 0 | -4.926294 | -1.294869 | -0.374572 |
| 39 | 1  | 0 | -2.821979 | 1.593801  | 0.404251  |

---

## Int2

| Center<br>Number | Atomic<br>Number | Atomic<br>Type | Coordinates (Angstroms) |           |           |
|------------------|------------------|----------------|-------------------------|-----------|-----------|
|                  |                  |                | X                       | Y         | Z         |
| 1                | 6                | 0              | 1.102416                | -0.438725 | -1.187445 |
| 2                | 6                | 0              | -0.268394               | -0.614279 | -1.063924 |
| 3                | 6                | 0              | 0.091721                | -2.577582 | 0.320583  |
| 4                | 6                | 0              | 1.465955                | -2.436364 | 0.178244  |
| 5                | 6                | 0              | 1.936804                | -1.349760 | -0.548857 |
| 6                | 1                | 0              | 1.520089                | 0.376487  | -1.766688 |
| 7                | 1                | 0              | -0.960064               | 0.065090  | -1.548538 |
| 8                | 1                | 0              | -0.323431               | -3.394309 | 0.900790  |
| 9                | 1                | 0              | 2.163262                | -3.127726 | 0.635428  |
| 10               | 7                | 0              | 3.381517                | -1.140775 | -0.623046 |
| 11               | 8                | 0              | 3.777465                | 0.003169  | -0.826063 |
| 12               | 8                | 0              | 4.114602                | -2.095576 | -0.466223 |
| 13               | 6                | 0              | -0.763087               | -1.657177 | -0.283170 |
| 14               | 7                | 0              | -2.748087               | -0.779562 | 1.347355  |
| 15               | 16               | 0              | -2.524759               | -1.706711 | 0.093042  |
| 16               | 8                | 0              | -2.807591               | -3.135450 | 0.337912  |
| 17               | 8                | 0              | -3.172262               | -1.100370 | -1.083837 |
| 18               | 1                | 0              | -2.439963               | -1.291618 | 2.174464  |

---

## TS2

| Center<br>Number | Atomic<br>Number | Atomic<br>Type | Coordinates (Angstroms) |          |          |
|------------------|------------------|----------------|-------------------------|----------|----------|
|                  |                  |                | X                       | Y        | Z        |
| 1                | 6                | 0              | 3.609002                | 0.448681 | 0.295305 |

|    |    |   |           |           |           |
|----|----|---|-----------|-----------|-----------|
| 2  | 6  | 0 | 2.484940  | 1.197935  | 0.629065  |
| 3  | 6  | 0 | 1.438760  | 0.579833  | -1.476826 |
| 4  | 6  | 0 | 2.553511  | -0.173838 | -1.819253 |
| 5  | 6  | 0 | 3.615441  | -0.218929 | -0.922428 |
| 6  | 1  | 0 | 4.461263  | 0.380871  | 0.960308  |
| 7  | 1  | 0 | 2.430171  | 1.724524  | 1.575569  |
| 8  | 1  | 0 | 0.589099  | 0.626344  | -2.150995 |
| 9  | 1  | 0 | 2.601836  | -0.720331 | -2.752626 |
| 10 | 7  | 0 | 4.793628  | -1.022898 | -1.273303 |
| 11 | 8  | 0 | 5.709310  | -1.081962 | -0.468542 |
| 12 | 8  | 0 | 4.798815  | -1.592728 | -2.352487 |
| 13 | 6  | 0 | 1.414977  | 1.258759  | -0.259938 |
| 14 | 6  | 0 | -0.658615 | -0.960229 | 0.847423  |
| 15 | 6  | 0 | -1.608702 | -0.305433 | 0.368638  |
| 16 | 6  | 0 | 0.613003  | -1.394121 | 1.284404  |
| 17 | 8  | 0 | 1.409304  | -2.057973 | 0.627595  |
| 18 | 8  | 0 | 0.869221  | -1.041936 | 2.571067  |
| 19 | 6  | 0 | 2.097879  | -1.532996 | 3.108695  |
| 20 | 1  | 0 | 2.105360  | -2.625378 | 3.113790  |
| 21 | 1  | 0 | 2.946066  | -1.170777 | 2.523467  |
| 22 | 1  | 0 | 2.147440  | -1.149304 | 4.126268  |
| 23 | 6  | 0 | -3.023684 | -0.434992 | 0.009407  |
| 24 | 6  | 0 | -3.456349 | -1.663220 | -0.513185 |
| 25 | 6  | 0 | -3.962595 | 0.583464  | 0.218976  |
| 26 | 6  | 0 | -4.796711 | -1.877635 | -0.821456 |
| 27 | 1  | 0 | -2.730622 | -2.453163 | -0.676556 |
| 28 | 6  | 0 | -5.308028 | 0.381562  | -0.077806 |
| 29 | 6  | 0 | -5.693659 | -0.845520 | -0.594203 |
| 30 | 1  | 0 | -5.143630 | -2.819458 | -1.231749 |
| 31 | 1  | 0 | -6.048325 | 1.156874  | 0.085581  |
| 32 | 9  | 0 | -6.999381 | -1.043484 | -0.891501 |
| 33 | 7  | 0 | -1.344837 | 1.569712  | -0.237042 |
| 34 | 16 | 0 | 0.006950  | 2.318229  | 0.128603  |
| 35 | 8  | 0 | 0.218522  | 3.511937  | -0.720997 |
| 36 | 8  | 0 | 0.072263  | 2.522462  | 1.584450  |
| 37 | 1  | 0 | -3.627857 | 1.534187  | 0.614930  |
| 38 | 1  | 0 | -1.523610 | 1.649273  | -1.239316 |

---

### Int3

---

| Center<br>Number | Atomic<br>Number | Atomic<br>Type | Coordinates (Angstroms) |   |   |
|------------------|------------------|----------------|-------------------------|---|---|
|                  |                  |                | X                       | Y | Z |

---

|    |    |   |           |           |           |
|----|----|---|-----------|-----------|-----------|
| 1  | 6  | 0 | 3.610780  | 0.426331  | 0.289647  |
| 2  | 6  | 0 | 2.504963  | 1.185956  | 0.636314  |
| 3  | 6  | 0 | 1.420068  | 0.568496  | -1.451746 |
| 4  | 6  | 0 | 2.519760  | -0.200592 | -1.802947 |
| 5  | 6  | 0 | 3.593294  | -0.249908 | -0.922221 |
| 6  | 1  | 0 | 4.473341  | 0.348049  | 0.939911  |
| 7  | 1  | 0 | 2.461739  | 1.716056  | 1.582895  |
| 8  | 1  | 0 | 0.557486  | 0.615279  | -2.112589 |
| 9  | 1  | 0 | 2.552747  | -0.757144 | -2.730523 |
| 10 | 7  | 0 | 4.752013  | -1.067502 | -1.283592 |
| 11 | 8  | 0 | 5.679336  | -1.125179 | -0.494016 |
| 12 | 8  | 0 | 4.732630  | -1.647394 | -2.355938 |
| 13 | 6  | 0 | 1.428013  | 1.251422  | -0.238144 |
| 14 | 6  | 0 | -0.683998 | -0.906746 | 0.804896  |
| 15 | 6  | 0 | -1.539356 | -0.053699 | 0.285272  |
| 16 | 6  | 0 | 0.579011  | -1.334694 | 1.221288  |
| 17 | 8  | 0 | 1.391160  | -2.018474 | 0.586068  |
| 18 | 8  | 0 | 0.855118  | -1.008801 | 2.540183  |
| 19 | 6  | 0 | 2.074530  | -1.535325 | 3.045315  |
| 20 | 1  | 0 | 2.076283  | -2.631928 | 3.034563  |
| 21 | 1  | 0 | 2.932837  | -1.185529 | 2.464230  |
| 22 | 1  | 0 | 2.151125  | -1.176810 | 4.072704  |
| 23 | 6  | 0 | -2.995910 | -0.351812 | 0.000057  |
| 24 | 6  | 0 | -3.434924 | -1.652559 | -0.296313 |
| 25 | 6  | 0 | -3.953652 | 0.670178  | 0.006979  |
| 26 | 6  | 0 | -4.773597 | -1.920023 | -0.588910 |
| 27 | 1  | 0 | -2.707111 | -2.459408 | -0.302208 |
| 28 | 6  | 0 | -5.294681 | 0.423579  | -0.272952 |
| 29 | 6  | 0 | -5.684049 | -0.869134 | -0.579499 |
| 30 | 1  | 0 | -5.114586 | -2.921066 | -0.832868 |
| 31 | 1  | 0 | -6.030881 | 1.218601  | -0.263166 |
| 32 | 9  | 0 | -6.978828 | -1.106146 | -0.871853 |
| 33 | 7  | 0 | -1.309024 | 1.451586  | -0.182868 |
| 34 | 16 | 0 | 0.051566  | 2.304356  | 0.174344  |
| 35 | 8  | 0 | 0.179728  | 3.485585  | -0.692867 |
| 36 | 8  | 0 | 0.092769  | 2.521223  | 1.617641  |
| 37 | 1  | 0 | -3.647760 | 1.680393  | 0.246908  |
| 38 | 1  | 0 | -1.541178 | 1.554041  | -1.172224 |

---

**TS2'**

---

| Center<br>Number | Atomic<br>Number | Atomic<br>Type | Coordinates (Angstroms) |           |           |
|------------------|------------------|----------------|-------------------------|-----------|-----------|
|                  |                  |                | X                       | Y         | Z         |
| 1                | 6                | 0              | 1.094787                | -2.259990 | -0.629473 |
| 2                | 6                | 0              | -0.108675               | -1.879396 | -0.039715 |
| 3                | 6                | 0              | 1.113010                | -0.663569 | 1.677160  |
| 4                | 6                | 0              | 2.318036                | -1.026817 | 1.092050  |
| 5                | 6                | 0              | 2.278376                | -1.817553 | -0.053262 |
| 6                | 1                | 0              | 1.117089                | -2.873267 | -1.521799 |
| 7                | 1                | 0              | -1.058368               | -2.184689 | -0.464794 |
| 8                | 1                | 0              | 1.106740                | -0.045839 | 2.570086  |
| 9                | 1                | 0              | 3.266951                | -0.704917 | 1.502784  |
| 10               | 7                | 0              | 3.549284                | -2.184954 | -0.692557 |
| 11               | 8                | 0              | 3.510945                | -2.916737 | -1.668293 |
| 12               | 8                | 0              | 4.579812                | -1.734740 | -0.218758 |
| 13               | 6                | 0              | -0.087298               | -1.086635 | 1.103178  |
| 14               | 6                | 0              | -2.247769               | 1.093630  | -1.293663 |
| 15               | 6                | 0              | -1.319059               | 1.397905  | -0.504052 |
| 16               | 6                | 0              | -3.589027               | 0.597076  | -1.304066 |
| 17               | 8                | 0              | -4.582023               | 1.215558  | -0.942086 |
| 18               | 8                | 0              | -3.672008               | -0.644158 | -1.829234 |
| 19               | 6                | 0              | 0.077707                | 1.821888  | -0.447127 |
| 20               | 6                | 0              | 0.990494                | 1.211886  | -1.319025 |
| 21               | 6                | 0              | 0.536348                | 2.807301  | 0.437192  |
| 22               | 6                | 0              | 2.338713                | 1.558867  | -1.301254 |
| 23               | 1                | 0              | 0.635587                | 0.450307  | -2.005921 |
| 24               | 6                | 0              | 1.880197                | 3.166951  | 0.467570  |
| 25               | 6                | 0              | 2.753334                | 2.525275  | -0.399018 |
| 26               | 1                | 0              | 3.057771                | 1.086716  | -1.962399 |
| 27               | 1                | 0              | 2.250561                | 3.928567  | 1.144534  |
| 28               | 9                | 0              | 4.062571                | 2.862329  | -0.364443 |
| 29               | 7                | 0              | -1.714275               | 1.076709  | 1.460131  |
| 30               | 16               | 0              | -1.630463               | -0.477049 | 1.808213  |
| 31               | 8                | 0              | -1.507022               | -0.717752 | 3.261455  |
| 32               | 8                | 0              | -2.704963               | -1.187286 | 1.100527  |
| 33               | 1                | 0              | -0.162078               | 3.307606  | 1.100483  |
| 34               | 1                | 0              | -1.069917               | 1.563933  | 2.086162  |
| 35               | 6                | 0              | -4.966226               | -1.246049 | -1.782414 |
| 36               | 1                | 0              | -5.683253               | -0.664636 | -2.365744 |
| 37               | 1                | 0              | -4.845285               | -2.238838 | -2.212229 |
| 38               | 1                | 0              | -5.312201               | -1.319090 | -0.748980 |

---

**Int3'**

---

| Center<br>Number | Atomic<br>Number | Atomic<br>Type | Coordinates (Angstroms) |           |           |
|------------------|------------------|----------------|-------------------------|-----------|-----------|
|                  |                  |                | X                       | Y         | Z         |
| 1                | 6                | 0              | 0.577828                | -2.401574 | -0.574721 |
| 2                | 6                | 0              | -0.495449               | -1.717625 | -0.026198 |
| 3                | 6                | 0              | 0.929087                | -0.935691 | 1.807562  |
| 4                | 6                | 0              | 2.010058                | -1.606409 | 1.252103  |
| 5                | 6                | 0              | 1.807072                | -2.324314 | 0.079563  |
| 6                | 1                | 0              | 0.485377                | -2.968282 | -1.485560 |
| 7                | 1                | 0              | -1.468335               | -1.696625 | -0.527030 |
| 8                | 1                | 0              | 1.033003                | -0.365750 | 2.720029  |
| 9                | 1                | 0              | 2.987305                | -1.590313 | 1.717024  |
| 10               | 7                | 0              | 2.945055                | -3.045420 | -0.504253 |
| 11               | 8                | 0              | 2.754551                | -3.682782 | -1.525603 |
| 12               | 8                | 0              | 4.021878                | -2.968058 | 0.061814  |
| 13               | 6                | 0              | -0.299511               | -1.004003 | 1.150083  |
| 14               | 6                | 0              | -1.810592               | 1.058741  | -1.420293 |
| 15               | 6                | 0              | -1.191823               | 1.443816  | -0.088717 |
| 16               | 6                | 0              | -3.143107               | 0.569377  | -1.378262 |
| 17               | 8                | 0              | -4.240974               | 1.158566  | -1.375624 |
| 18               | 8                | 0              | -3.181639               | -0.816111 | -1.695096 |
| 19               | 6                | 0              | 0.291974                | 1.977496  | -0.501019 |
| 20               | 6                | 0              | 1.298674                | 1.219135  | -1.113525 |
| 21               | 6                | 0              | 0.692397                | 3.215553  | 0.045738  |
| 22               | 6                | 0              | 2.644704                | 1.624908  | -1.116807 |
| 23               | 1                | 0              | 1.027775                | 0.253515  | -1.556556 |
| 24               | 6                | 0              | 2.012574                | 3.646521  | 0.054305  |
| 25               | 6                | 0              | 2.974203                | 2.828972  | -0.504367 |
| 26               | 1                | 0              | 3.425859                | 1.015154  | -1.553841 |
| 27               | 1                | 0              | 2.299691                | 4.598377  | 0.493188  |
| 28               | 9                | 0              | 4.263254                | 3.229292  | -0.455963 |
| 29               | 7                | 0              | -1.392320               | 1.456291  | 0.891200  |
| 30               | 16               | 0              | -1.664375               | -0.057623 | 1.752245  |
| 31               | 8                | 0              | -1.516219               | 0.101571  | 3.206464  |
| 32               | 8                | 0              | -2.902954               | -0.561562 | 1.224209  |
| 33               | 1                | 0              | -0.063143               | 3.857025  | 0.498571  |
| 34               | 1                | 0              | -0.623852               | 1.970148  | 1.344491  |
| 35               | 6                | 0              | -4.450934               | -1.429156 | -1.541008 |
| 36               | 1                | 0              | -5.189740               | -1.001045 | -2.216676 |
| 37               | 1                | 0              | -4.304107               | -2.491054 | -1.776786 |
| 38               | 1                | 0              | -4.816340               | -1.332385 | -0.517680 |

---



## Int4

---

| Center<br>Number | Atomic<br>Number | Atomic<br>Type | Coordinates (Angstroms) |           |           |
|------------------|------------------|----------------|-------------------------|-----------|-----------|
|                  |                  |                | X                       | Y         | Z         |
| 1                | 6                | 0              | 3.787190                | 0.056084  | 0.559079  |
| 2                | 6                | 0              | 2.789052                | 0.969093  | 0.961887  |
| 3                | 6                | 0              | 1.811948                | 0.912757  | -1.257774 |
| 4                | 6                | 0              | 2.803820                | -0.008890 | -1.677967 |
| 5                | 6                | 0              | 3.756542                | -0.339433 | -0.757041 |
| 6                | 1                | 0              | 4.546820                | -0.324623 | 1.245015  |
| 7                | 1                | 0              | 2.708000                | 1.306261  | 1.992908  |
| 8                | 1                | 0              | 1.009134                | 1.193349  | -1.933288 |
| 9                | 1                | 0              | 2.819537                | -0.445867 | -2.685544 |
| 10               | 7                | 0              | 4.904294                | -1.209282 | -1.229587 |
| 11               | 8                | 0              | 5.737139                | -1.491033 | -0.414432 |
| 12               | 8                | 0              | 4.892276                | -1.525971 | -2.387377 |
| 13               | 6                | 0              | 1.939713                | 1.481807  | 0.001696  |
| 14               | 6                | 0              | -0.569376               | -0.331893 | 0.971196  |
| 15               | 6                | 0              | -1.335952               | 0.494470  | 0.270968  |
| 16               | 6                | 0              | -0.445020               | -1.661418 | 1.149731  |
| 17               | 8                | 0              | 0.106305                | -2.512263 | 0.414782  |
| 18               | 8                | 0              | -0.825311               | -2.030398 | 2.454699  |
| 19               | 6                | 0              | -0.580416               | -3.381709 | 2.773533  |
| 20               | 1                | 0              | -1.101813               | -4.063786 | 2.093044  |
| 21               | 1                | 0              | 0.491330                | -3.637585 | 2.743052  |
| 22               | 1                | 0              | -0.958817               | -3.534752 | 3.796773  |
| 23               | 6                | 0              | -2.680884               | 0.194973  | -0.298872 |
| 24               | 6                | 0              | -2.943689               | -1.124473 | -0.672957 |
| 25               | 6                | 0              | -3.728680               | 1.133724  | -0.343888 |
| 26               | 6                | 0              | -4.218608               | -1.522748 | -1.084478 |
| 27               | 1                | 0              | -2.132197               | -1.845581 | -0.630533 |
| 28               | 6                | 0              | -5.011693               | 0.749493  | -0.736012 |
| 29               | 6                | 0              | -5.222522               | -0.564962 | -1.097264 |
| 30               | 1                | 0              | -4.436251               | -2.537500 | -1.374624 |
| 31               | 1                | 0              | -5.832433               | 1.457057  | -0.768054 |
| 32               | 9                | 0              | -6.459188               | -0.946154 | -1.489290 |
| 33               | 7                | 0              | -0.976638               | 1.934867  | 0.101014  |
| 34               | 16               | 0              | 0.495221                | 2.461642  | 0.595295  |
| 35               | 8                | 0              | 0.720054                | 3.707576  | -0.164884 |
| 36               | 8                | 0              | 0.566725                | 2.531943  | 2.047560  |
| 37               | 1                | 0              | -3.542456               | 2.156741  | -0.038085 |
| 38               | 1                | 0              | -1.161336               | 2.326220  | -0.825554 |

---

**TS3**

---

| Center<br>Number | Atomic<br>Number | Atomic<br>Type | Coordinates (Angstroms) |           |           |
|------------------|------------------|----------------|-------------------------|-----------|-----------|
|                  |                  |                | X                       | Y         | Z         |
| 1                | 6                | 0              | 3.692892                | 0.007500  | 0.604222  |
| 2                | 6                | 0              | 2.619638                | 0.753205  | 1.049934  |
| 3                | 6                | 0              | 1.710088                | 0.791702  | -1.218915 |
| 4                | 6                | 0              | 2.777776                | 0.037835  | -1.661878 |
| 5                | 6                | 0              | 3.753409                | -0.364219 | -0.743331 |
| 6                | 1                | 0              | 4.487553                | -0.282857 | 1.280561  |
| 7                | 1                | 0              | 2.543193                | 1.049110  | 2.089881  |
| 8                | 1                | 0              | 0.952231                | 1.125165  | -1.920968 |
| 9                | 1                | 0              | 2.876375                | -0.227983 | -2.707195 |
| 10               | 7                | 0              | 4.874049                | -1.145687 | -1.207183 |
| 11               | 8                | 0              | 5.735482                | -1.474699 | -0.396534 |
| 12               | 8                | 0              | 4.922948                | -1.454039 | -2.394645 |
| 13               | 6                | 0              | 1.576269                | 1.073323  | 0.158055  |
| 14               | 6                | 0              | -0.344253               | -0.189543 | 0.734696  |
| 15               | 6                | 0              | -1.304991               | 0.561226  | 0.215901  |
| 16               | 6                | 0              | -0.266261               | -1.569826 | 1.058805  |
| 17               | 8                | 0              | 0.305712                | -2.439448 | 0.395066  |
| 18               | 8                | 0              | -0.792257               | -1.866899 | 2.283356  |
| 19               | 6                | 0              | -0.642372               | -3.219911 | 2.712961  |
| 20               | 1                | 0              | -1.147042               | -3.902796 | 2.025432  |
| 21               | 1                | 0              | 0.413753                | -3.491399 | 2.776802  |
| 22               | 1                | 0              | -1.104030               | -3.270019 | 3.698057  |
| 23               | 6                | 0              | -2.662463               | 0.180790  | -0.247527 |
| 24               | 6                | 0              | -2.912931               | -1.133900 | -0.669941 |
| 25               | 6                | 0              | -3.714817               | 1.106558  | -0.264871 |
| 26               | 6                | 0              | -4.182094               | -1.523697 | -1.083826 |
| 27               | 1                | 0              | -2.100600               | -1.854379 | -0.687493 |
| 28               | 6                | 0              | -4.992977               | 0.732569  | -0.677646 |
| 29               | 6                | 0              | -5.196798               | -0.577259 | -1.077022 |
| 30               | 1                | 0              | -4.386914               | -2.534960 | -1.417564 |
| 31               | 1                | 0              | -5.816935               | 1.437554  | -0.687619 |
| 32               | 9                | 0              | -6.434031               | -0.949856 | -1.482967 |
| 33               | 7                | 0              | -1.026110               | 1.979871  | 0.076312  |
| 34               | 16               | 0              | 0.477744                | 2.425355  | 0.616370  |
| 35               | 8                | 0              | 0.841081                | 3.616518  | -0.160792 |
| 36               | 8                | 0              | 0.475075                | 2.536542  | 2.071904  |
| 37               | 1                | 0              | -3.541735               | 2.125616  | 0.065658  |
| 38               | 1                | 0              | -1.214069               | 2.388777  | -0.839213 |

---

**Int5**

---

| Center<br>Number | Atomic<br>Number | Atomic<br>Type | Coordinates (Angstroms) |           |           |
|------------------|------------------|----------------|-------------------------|-----------|-----------|
|                  |                  |                | X                       | Y         | Z         |
| 1                | 6                | 0              | 3.423610                | -0.460841 | 0.993289  |
| 2                | 6                | 0              | 2.108903                | -0.220324 | 1.211468  |
| 3                | 6                | 0              | 1.781108                | 0.054620  | -1.239582 |
| 4                | 6                | 0              | 3.099854                | -0.195619 | -1.430454 |
| 5                | 6                | 0              | 3.975075                | -0.408622 | -0.324223 |
| 6                | 1                | 0              | 4.071721                | -0.736825 | 1.817428  |
| 7                | 1                | 0              | 1.689577                | -0.303325 | 2.209039  |
| 8                | 1                | 0              | 1.112480                | 0.180174  | -2.085971 |
| 9                | 1                | 0              | 3.502385                | -0.269086 | -2.434542 |
| 10               | 7                | 0              | 5.311673                | -0.650357 | -0.530503 |
| 11               | 8                | 0              | 6.068081                | -0.872098 | 0.448316  |
| 12               | 8                | 0              | 5.778244                | -0.643273 | -1.697421 |
| 13               | 6                | 0              | 1.199393                | 0.198537  | 0.117235  |
| 14               | 6                | 0              | -0.243742               | -0.280429 | 0.221423  |
| 15               | 6                | 0              | -1.231912               | 0.635937  | 0.054731  |
| 16               | 6                | 0              | -0.456655               | -1.724649 | 0.435777  |
| 17               | 8                | 0              | 0.320021                | -2.588628 | 0.075337  |
| 18               | 8                | 0              | -1.582280               | -1.996736 | 1.110569  |
| 19               | 6                | 0              | -1.905061               | -3.384952 | 1.250802  |
| 20               | 1                | 0              | -2.008882               | -3.847397 | 0.266735  |
| 21               | 1                | 0              | -1.127183               | -3.899892 | 1.816865  |
| 22               | 1                | 0              | -2.850959               | -3.411941 | 1.787423  |
| 23               | 6                | 0              | -2.672274               | 0.395538  | -0.165461 |
| 24               | 6                | 0              | -3.098060               | -0.624430 | -1.025609 |
| 25               | 6                | 0              | -3.618506               | 1.221958  | 0.450809  |
| 26               | 6                | 0              | -4.452216               | -0.839048 | -1.249948 |
| 27               | 1                | 0              | -2.365360               | -1.244619 | -1.533628 |
| 28               | 6                | 0              | -4.979579               | 1.015534  | 0.242014  |
| 29               | 6                | 0              | -5.362319               | -0.013591 | -0.603483 |
| 30               | 1                | 0              | -4.804448               | -1.618300 | -1.916096 |
| 31               | 1                | 0              | -5.730664               | 1.634508  | 0.719223  |
| 32               | 9                | 0              | -6.679319               | -0.217211 | -0.817815 |
| 33               | 7                | 0              | -0.849366               | 1.981794  | 0.074340  |
| 34               | 16               | 0              | 0.814075                | 2.122465  | 0.405346  |
| 35               | 8                | 0              | 1.380809                | 3.040467  | -0.591567 |
| 36               | 8                | 0              | 0.968048                | 2.479762  | 1.820319  |
| 37               | 1                | 0              | -3.288602               | 2.018008  | 1.110467  |
| 38               | 1                | 0              | -1.216635               | 2.600431  | -0.646154 |

---

**Int6**

---

| Center<br>Number | Atomic<br>Number | Atomic<br>Type | Coordinates (Angstroms) |           |           |
|------------------|------------------|----------------|-------------------------|-----------|-----------|
|                  |                  |                | X                       | Y         | Z         |
| 1                | 6                | 0              | 4.355607                | 0.112382  | 1.167716  |
| 2                | 6                | 0              | 3.013135                | -0.219248 | 1.198482  |
| 3                | 6                | 0              | 3.047146                | -0.663041 | -1.170391 |
| 4                | 6                | 0              | 4.395993                | -0.348357 | -1.223740 |
| 5                | 6                | 0              | 5.027169                | 0.045163  | -0.051427 |
| 6                | 1                | 0              | 4.888221                | 0.408846  | 2.062320  |
| 7                | 1                | 0              | 2.473173                | -0.183056 | 2.139041  |
| 8                | 1                | 0              | 2.531646                | -0.968630 | -2.074916 |
| 9                | 1                | 0              | 4.957913                | -0.413759 | -2.146690 |
| 10               | 7                | 0              | 6.445557                | 0.382121  | -0.092612 |
| 11               | 8                | 0              | 6.990042                | 0.717326  | 0.948486  |
| 12               | 8                | 0              | 7.025149                | 0.313891  | -1.165984 |
| 13               | 6                | 0              | 2.324068                | -0.572717 | 0.026639  |
| 14               | 6                | 0              | 0.921745                | -1.069018 | 0.073101  |
| 15               | 6                | 0              | -0.003632               | -0.505617 | -0.782585 |
| 16               | 6                | 0              | 0.692917                | -2.171887 | 1.001140  |
| 17               | 8                | 0              | 1.578038                | -2.813371 | 1.537905  |
| 18               | 8                | 0              | -0.613050               | -2.458256 | 1.260750  |
| 19               | 6                | 0              | -0.821897               | -3.690587 | 1.959045  |
| 20               | 1                | 0              | -0.331548               | -4.512393 | 1.434762  |
| 21               | 1                | 0              | -0.432291               | -3.628422 | 2.976165  |
| 22               | 1                | 0              | -1.899988               | -3.850891 | 1.972261  |
| 23               | 6                | 0              | -1.332805               | -1.069552 | -1.134312 |
| 24               | 6                | 0              | -1.489114               | -2.432957 | -1.412087 |
| 25               | 6                | 0              | -2.436961               | -0.217271 | -1.251909 |
| 26               | 6                | 0              | -2.729239               | -2.947936 | -1.763917 |
| 27               | 1                | 0              | -0.628917               | -3.092000 | -1.354288 |
| 28               | 6                | 0              | -3.689962               | -0.718997 | -1.594641 |
| 29               | 6                | 0              | -3.810484               | -2.078590 | -1.840158 |
| 30               | 1                | 0              | -2.868514               | -3.999393 | -1.986701 |
| 31               | 1                | 0              | -4.558617               | -0.075559 | -1.675501 |
| 32               | 9                | 0              | -5.012458               | -2.572306 | -2.172369 |
| 33               | 7                | 0              | 0.331219                | 0.649462  | -1.402255 |
| 34               | 16               | 0              | 1.295335                | 1.868166  | -0.469198 |
| 35               | 8                | 0              | 2.459630                | 2.187811  | -1.335638 |
| 36               | 8                | 0              | 0.291415                | 3.013846  | -0.581690 |
| 37               | 1                | 0              | -2.320560               | 0.846157  | -1.064763 |
| 38               | 1                | 0              | -0.347819               | 1.066976  | -2.032643 |
| 39               | 1                | 0              | -1.117262               | 2.891892  | 0.035614  |

|    |    |   |           |           |          |
|----|----|---|-----------|-----------|----------|
| 40 | 6  | 0 | -2.267656 | 1.797080  | 1.154441 |
| 41 | 8  | 0 | -2.089380 | 2.862641  | 0.323815 |
| 42 | 8  | 0 | -3.462934 | 1.588328  | 1.505936 |
| 43 | 8  | 0 | -1.265530 | 1.109945  | 1.452114 |
| 44 | 19 | 0 | -4.648908 | 3.590263  | 0.262502 |
| 45 | 19 | 0 | -2.818425 | -0.965060 | 1.923812 |

---

## TS4

---

| Center<br>Number | Atomic<br>Number | Atomic<br>Type | Coordinates (Angstroms) |           |           |
|------------------|------------------|----------------|-------------------------|-----------|-----------|
|                  |                  |                | X                       | Y         | Z         |
| 1                | 6                | 0              | -1.722873               | 0.162849  | 2.463555  |
| 2                | 6                | 0              | -0.625522               | -0.395827 | 1.813514  |
| 3                | 6                | 0              | -2.080774               | -2.080552 | 0.805054  |
| 4                | 6                | 0              | -3.179703               | -1.522602 | 1.445834  |
| 5                | 6                | 0              | -2.970119               | -0.410120 | 2.254121  |
| 6                | 1                | 0              | -1.617686               | 1.030292  | 3.102974  |
| 7                | 1                | 0              | 0.366605                | 0.027441  | 1.925631  |
| 8                | 1                | 0              | -2.199510               | -2.943513 | 0.157838  |
| 9                | 1                | 0              | -4.174902               | -1.929568 | 1.318632  |
| 10               | 7                | 0              | -4.139680               | 0.206761  | 2.906269  |
| 11               | 8                | 0              | -3.946359               | 1.162054  | 3.637892  |
| 12               | 8                | 0              | -5.237167               | -0.268729 | 2.672768  |
| 13               | 6                | 0              | -0.826309               | -1.503422 | 0.996120  |
| 14               | 6                | 0              | 0.854252                | 0.896888  | -1.428972 |
| 15               | 6                | 0              | -0.067747               | -0.063006 | -1.550564 |
| 16               | 6                | 0              | 0.461274                | 2.304424  | -1.531892 |
| 17               | 8                | 0              | 0.350465                | 2.929953  | -2.575779 |
| 18               | 8                | 0              | 0.316581                | 2.903651  | -0.329954 |
| 19               | 6                | 0              | -1.549014               | 0.102373  | -1.694253 |
| 20               | 6                | 0              | -2.242327               | 1.030247  | -0.904120 |
| 21               | 6                | 0              | -2.284530               | -0.693150 | -2.584445 |
| 22               | 6                | 0              | -3.626879               | 1.158336  | -0.986093 |
| 23               | 1                | 0              | -1.697062               | 1.639372  | -0.190343 |
| 24               | 6                | 0              | -3.668919               | -0.577688 | -2.685291 |
| 25               | 6                | 0              | -4.311117               | 0.344410  | -1.874344 |
| 26               | 1                | 0              | -4.170190               | 1.860895  | -0.362758 |
| 27               | 1                | 0              | -4.242016               | -1.186349 | -3.375753 |
| 28               | 9                | 0              | -5.657210               | 0.453378  | -1.953810 |
| 29               | 7                | 0              | 0.369238                | -1.457515 | -1.480540 |
| 30               | 16               | 0              | 0.540991                | -2.126138 | 0.034449  |
| 31               | 8                | 0              | 0.390243                | -3.569003 | -0.147491 |

|    |    |   |           |           |           |
|----|----|---|-----------|-----------|-----------|
| 32 | 8  | 0 | 1.767813  | -1.611885 | 0.635626  |
| 33 | 1  | 0 | -1.783568 | -1.409179 | -3.230649 |
| 34 | 1  | 0 | -0.193752 | -2.102694 | -2.032666 |
| 35 | 6  | 0 | -0.000967 | 4.298645  | -0.360968 |
| 36 | 1  | 0 | -0.957548 | 4.459276  | -0.863885 |
| 37 | 1  | 0 | -0.062637 | 4.610337  | 0.679945  |
| 38 | 1  | 0 | 2.226389  | 0.599044  | -1.323101 |
| 39 | 6  | 0 | 4.050005  | 0.590580  | -0.238591 |
| 40 | 8  | 0 | 3.365064  | 0.211720  | -1.315376 |
| 41 | 8  | 0 | 5.031937  | -0.151972 | 0.112538  |
| 42 | 8  | 0 | 3.716455  | 1.641072  | 0.386740  |
| 43 | 19 | 0 | 4.004283  | -2.349022 | -0.956562 |
| 44 | 19 | 0 | 5.631784  | 1.367562  | 2.213431  |
| 45 | 1  | 0 | 0.780087  | 4.856278  | -0.881072 |

### Int7

| Center<br>Number | Atomic<br>Number | Atomic<br>Type | Coordinates (Angstroms) |           |           |
|------------------|------------------|----------------|-------------------------|-----------|-----------|
|                  |                  |                | X                       | Y         | Z         |
| 1                | 6                | 0              | -0.864249               | 2.449802  | -0.319855 |
| 2                | 6                | 0              | 0.116469                | 1.550173  | 0.087236  |
| 3                | 6                | 0              | -1.174988               | 1.089193  | 2.119992  |
| 4                | 6                | 0              | -2.148119               | 1.994421  | 1.714617  |
| 5                | 6                | 0              | -1.966615               | 2.647116  | 0.501990  |
| 6                | 1                | 0              | -0.784493               | 2.981235  | -1.259498 |
| 7                | 1                | 0              | 0.998947                | 1.353220  | -0.536688 |
| 8                | 1                | 0              | -1.272347               | 0.547679  | 3.054427  |
| 9                | 1                | 0              | -3.027973               | 2.189443  | 2.313442  |
| 10               | 7                | 0              | -3.004939               | 3.595727  | 0.061486  |
| 11               | 8                | 0              | -2.840748               | 4.162138  | -1.003401 |
| 12               | 8                | 0              | -3.968849               | 3.758373  | 0.787041  |
| 13               | 6                | 0              | -0.065690               | 0.890400  | 1.302526  |
| 14               | 6                | 0              | 0.484258                | -1.317193 | -1.304865 |
| 15               | 6                | 0              | -0.110579               | -1.675192 | -0.161159 |
| 16               | 6                | 0              | -0.370043               | -1.169660 | -2.518759 |
| 17               | 8                | 0              | -0.754460               | -2.071243 | -3.226973 |
| 18               | 8                | 0              | -0.622061               | 0.122565  | -2.788377 |
| 19               | 6                | 0              | -1.574787               | -1.896615 | 0.065635  |
| 20               | 6                | 0              | -2.512192               | -0.950660 | -0.363767 |
| 21               | 6                | 0              | -2.032918               | -3.036758 | 0.742524  |
| 22               | 6                | 0              | -3.872688               | -1.133543 | -0.138167 |
| 23               | 1                | 0              | -2.171056               | -0.050290 | -0.872520 |

|    |    |   |           |           |           |
|----|----|---|-----------|-----------|-----------|
| 24 | 6  | 0 | -3.389614 | -3.237292 | 0.974452  |
| 25 | 6  | 0 | -4.284849 | -2.276789 | 0.528689  |
| 26 | 1  | 0 | -4.606766 | -0.403304 | -0.459541 |
| 27 | 1  | 0 | -3.752637 | -4.119411 | 1.485840  |
| 28 | 9  | 0 | -5.597256 | -2.460065 | 0.754598  |
| 29 | 7  | 0 | 0.684903  | -1.773195 | 1.052559  |
| 30 | 16 | 0 | 1.125366  | -0.331713 | 1.798087  |
| 31 | 8  | 0 | 1.023537  | -0.566413 | 3.236372  |
| 32 | 8  | 0 | 2.419970  | 0.079000  | 1.251444  |
| 33 | 1  | 0 | -1.328307 | -3.795227 | 1.074624  |
| 34 | 1  | 0 | 0.228352  | -2.332689 | 1.774207  |
| 35 | 6  | 0 | -1.423939 | 0.352112  | -3.948121 |
| 36 | 1  | 0 | -2.396638 | -0.133805 | -3.835492 |
| 37 | 1  | 0 | -1.546915 | 1.431313  | -4.017245 |
| 38 | 1  | 0 | 1.407022  | -1.166032 | -1.391281 |
| 39 | 6  | 0 | 3.516197  | 0.104217  | -1.324325 |
| 40 | 8  | 0 | 3.051404  | -1.076067 | -1.579747 |
| 41 | 8  | 0 | 4.674672  | 0.198990  | -0.755828 |
| 42 | 8  | 0 | 2.824430  | 1.156925  | -1.592862 |
| 43 | 19 | 0 | 4.115326  | -2.020437 | 0.614918  |
| 44 | 19 | 0 | 3.837590  | 2.328033  | 0.534139  |
| 45 | 1  | 0 | -0.925487 | -0.036715 | -4.836184 |

### Int8

| Center<br>Number | Atomic<br>Number | Atomic<br>Type | Coordinates (Angstroms) |           |           |
|------------------|------------------|----------------|-------------------------|-----------|-----------|
|                  |                  |                | X                       | Y         | Z         |
| 1                | 6                | 0              | -4.594945               | -0.871676 | 0.791044  |
| 2                | 6                | 0              | -3.334756               | -1.534355 | 0.634412  |
| 3                | 6                | 0              | -2.846376               | -0.237184 | -1.308101 |
| 4                | 6                | 0              | -4.069788               | 0.459309  | -1.184007 |
| 5                | 6                | 0              | -4.861651               | 0.036268  | -0.171113 |
| 6                | 1                | 0              | -5.273602               | -1.072349 | 1.603837  |
| 7                | 1                | 0              | -3.020227               | -2.297931 | 1.339769  |
| 8                | 1                | 0              | -2.142795               | 0.005890  | -2.100826 |
| 9                | 1                | 0              | -4.360964               | 1.280731  | -1.855347 |
| 10               | 7                | 0              | -6.259056               | 0.719545  | -0.088115 |
| 11               | 8                | 0              | -6.955302               | 0.357693  | 0.797433  |
| 12               | 8                | 0              | -6.484715               | 1.541161  | -0.910288 |
| 13               | 6                | 0              | -2.717538               | -1.344638 | -0.553378 |
| 14               | 6                | 0              | -0.352818               | 0.038027  | 1.039336  |
| 15               | 6                | 0              | 0.190293                | -0.233853 | -0.150981 |

|    |    |   |           |           |           |
|----|----|---|-----------|-----------|-----------|
| 16 | 6  | 0 | -1.306126 | 1.054999  | 1.251895  |
| 17 | 8  | 0 | -2.085590 | 1.210656  | 2.242706  |
| 18 | 8  | 0 | -1.386005 | 2.028461  | 0.238778  |
| 19 | 6  | 0 | 1.185694  | 0.786336  | -0.586809 |
| 20 | 6  | 0 | 1.652713  | 1.621668  | 0.433150  |
| 21 | 6  | 0 | 1.768949  | 0.848693  | -1.840666 |
| 22 | 6  | 0 | 2.648064  | 2.566909  | 0.193570  |
| 23 | 1  | 0 | 1.233541  | 1.502712  | 1.426937  |
| 24 | 6  | 0 | 2.779303  | 1.776311  | -2.111574 |
| 25 | 6  | 0 | 3.181109  | 2.615119  | -1.083548 |
| 26 | 1  | 0 | 3.017562  | 3.230560  | 0.962696  |
| 27 | 1  | 0 | 3.244341  | 1.871923  | -3.085748 |
| 28 | 9  | 0 | 4.154737  | 3.523645  | -1.332689 |
| 29 | 7  | 0 | 0.194818  | -1.394630 | -0.956384 |
| 30 | 16 | 0 | -1.071942 | -2.279311 | -0.761861 |
| 31 | 8  | 0 | -1.492638 | -2.897892 | -2.045197 |
| 32 | 8  | 0 | -0.990701 | -3.235158 | 0.362781  |
| 33 | 1  | 0 | 1.424940  | 0.176535  | -2.619507 |
| 34 | 1  | 0 | 2.059529  | -1.909066 | -0.739510 |
| 35 | 6  | 0 | -2.183558 | 3.161857  | 0.521234  |
| 36 | 1  | 0 | -1.897325 | 3.642369  | 1.460545  |
| 37 | 1  | 0 | -2.024960 | 3.849139  | -0.313770 |
| 38 | 1  | 0 | -3.249230 | 2.901981  | 0.586085  |
| 39 | 1  | 0 | -1.079370 | -1.143348 | 1.411240  |
| 40 | 6  | 0 | 3.232896  | -1.394857 | 0.687015  |
| 41 | 8  | 0 | 2.282620  | -1.464962 | 1.476824  |
| 42 | 8  | 0 | 4.398747  | -0.956508 | 0.918357  |
| 43 | 8  | 0 | 3.044069  | -1.846363 | -0.604528 |
| 44 | 19 | 0 | 3.620811  | -0.164816 | 3.354491  |
| 45 | 19 | 0 | 5.286242  | -0.712957 | -1.552109 |

---

## TS5

---

| Center<br>Number | Atomic<br>Number | Atomic<br>Type | Coordinates (Angstroms) |           |           |
|------------------|------------------|----------------|-------------------------|-----------|-----------|
|                  |                  |                | X                       | Y         | Z         |
| 1                | 6                | 0              | -4.607697               | -0.966367 | 0.787960  |
| 2                | 6                | 0              | -3.341188               | -1.497493 | 0.776675  |
| 3                | 6                | 0              | -2.832467               | -0.208486 | -1.246999 |
| 4                | 6                | 0              | -4.093167               | 0.325462  | -1.220192 |
| 5                | 6                | 0              | -4.985877               | -0.027418 | -0.187741 |
| 6                | 1                | 0              | -5.325404               | -1.273787 | 1.539487  |
| 7                | 1                | 0              | -3.042595               | -2.222089 | 1.526727  |



|    |    |   |           |           |           |
|----|----|---|-----------|-----------|-----------|
| 8  | 1  | 0 | -2.152002 | 0.050204  | -2.052997 |
| 9  | 1  | 0 | -4.420738 | 1.001427  | -2.001315 |
| 10 | 7  | 0 | -6.291202 | 0.523131  | -0.167574 |
| 11 | 8  | 0 | -7.072712 | 0.184383  | 0.728763  |
| 12 | 8  | 0 | -6.615069 | 1.332424  | -1.044865 |
| 13 | 6  | 0 | -2.368810 | -1.046609 | -0.174270 |
| 14 | 6  | 0 | -0.850262 | -0.106480 | 0.827691  |
| 15 | 6  | 0 | 0.164999  | -0.225487 | -0.200212 |
| 16 | 6  | 0 | -1.465147 | 1.147474  | 1.237315  |
| 17 | 8  | 0 | -2.061303 | 1.307080  | 2.293380  |
| 18 | 8  | 0 | -1.445750 | 2.080952  | 0.268529  |
| 19 | 6  | 0 | 1.143387  | 0.831650  | -0.527466 |
| 20 | 6  | 0 | 1.604635  | 1.699997  | 0.470028  |
| 21 | 6  | 0 | 1.658615  | 0.932637  | -1.825096 |
| 22 | 6  | 0 | 2.568002  | 2.659655  | 0.183076  |
| 23 | 1  | 0 | 1.225329  | 1.605862  | 1.483322  |
| 24 | 6  | 0 | 2.614959  | 1.894652  | -2.133944 |
| 25 | 6  | 0 | 3.048556  | 2.733324  | -1.117562 |
| 26 | 1  | 0 | 2.947628  | 3.335791  | 0.940635  |
| 27 | 1  | 0 | 3.018491  | 2.001627  | -3.134497 |
| 28 | 9  | 0 | 3.981235  | 3.665102  | -1.405728 |
| 29 | 7  | 0 | 0.223910  | -1.332984 | -0.910506 |
| 30 | 16 | 0 | -1.106343 | -2.293604 | -0.652312 |
| 31 | 8  | 0 | -1.462495 | -2.922487 | -1.927137 |
| 32 | 8  | 0 | -0.900138 | -3.188320 | 0.495722  |
| 33 | 1  | 0 | 1.296763  | 0.257148  | -2.593340 |
| 34 | 1  | 0 | 2.120667  | -1.923050 | -0.746207 |
| 35 | 6  | 0 | -2.180469 | 3.277233  | 0.538081  |
| 36 | 1  | 0 | -1.798111 | 3.766642  | 1.435944  |
| 37 | 1  | 0 | -2.038046 | 3.913407  | -0.333193 |
| 38 | 1  | 0 | -3.239796 | 3.044567  | 0.671732  |
| 39 | 1  | 0 | -0.799822 | -0.852412 | 1.615639  |
| 40 | 6  | 0 | 3.321526  | -1.330207 | 0.640082  |
| 41 | 8  | 0 | 2.389794  | -1.387628 | 1.468240  |
| 42 | 8  | 0 | 4.489450  | -0.897529 | 0.818643  |
| 43 | 8  | 0 | 3.081636  | -1.787514 | -0.638190 |
| 44 | 19 | 0 | 3.845451  | -0.122430 | 3.344105  |
| 45 | 19 | 0 | 5.466347  | -1.017400 | -1.680214 |

---

## Int9

---

| Center<br>Number | Atomic<br>Number | Atomic<br>Type | Coordinates (Angstroms) |   |   |
|------------------|------------------|----------------|-------------------------|---|---|
|                  |                  |                | X                       | Y | Z |

---

|    |    |   |           |           |           |
|----|----|---|-----------|-----------|-----------|
| 1  | 6  | 0 | -4.543345 | -0.923276 | 0.765244  |
| 2  | 6  | 0 | -3.308956 | -1.482755 | 0.737612  |
| 3  | 6  | 0 | -2.781876 | -0.146884 | -1.269401 |
| 4  | 6  | 0 | -4.018188 | 0.407709  | -1.209807 |
| 5  | 6  | 0 | -4.926151 | 0.087868  | -0.158213 |
| 6  | 1  | 0 | -5.273602 | -1.252949 | 1.500637  |
| 7  | 1  | 0 | -3.033127 | -2.246331 | 1.455869  |
| 8  | 1  | 0 | -2.116995 | 0.109090  | -2.087926 |
| 9  | 1  | 0 | -4.348064 | 1.087231  | -1.984347 |
| 10 | 7  | 0 | -6.168756 | 0.680845  | -0.088115 |
| 11 | 8  | 0 | -6.968202 | 0.344793  | 0.810333  |
| 12 | 8  | 0 | -6.484715 | 1.554061  | -0.923188 |
| 13 | 6  | 0 | -2.227338 | -0.957638 | -0.140578 |
| 14 | 6  | 0 | -0.946218 | -0.232873 | 0.691036  |
| 15 | 6  | 0 | 0.203193  | -0.298353 | -0.292881 |
| 16 | 6  | 0 | -1.460926 | 1.080799  | 1.187395  |
| 17 | 8  | 0 | -2.033990 | 1.210656  | 2.242706  |
| 18 | 8  | 0 | -1.386005 | 2.028461  | 0.251678  |
| 19 | 6  | 0 | 1.211494  | 0.747636  | -0.548109 |
| 20 | 6  | 0 | 1.639813  | 1.621668  | 0.458950  |
| 21 | 6  | 0 | 1.781849  | 0.835793  | -1.827766 |
| 22 | 6  | 0 | 2.635164  | 2.554009  | 0.206470  |
| 23 | 1  | 0 | 1.207741  | 1.554312  | 1.452737  |
| 24 | 6  | 0 | 2.766403  | 1.776311  | -2.098674 |
| 25 | 6  | 0 | 3.181109  | 2.615119  | -1.070648 |
| 26 | 1  | 0 | 2.991762  | 3.230560  | 0.975596  |
| 27 | 1  | 0 | 3.205641  | 1.871923  | -3.085748 |
| 28 | 9  | 0 | 4.141837  | 3.510745  | -1.319789 |
| 29 | 7  | 0 | 0.246418  | -1.368830 | -1.007984 |
| 30 | 16 | 0 | -1.136442 | -2.318011 | -0.761861 |
| 31 | 8  | 0 | -1.505538 | -2.872092 | -2.058097 |
| 32 | 8  | 0 | -0.913301 | -3.248058 | 0.349881  |
| 33 | 1  | 0 | 1.437840  | 0.163635  | -2.606607 |
| 34 | 1  | 0 | 2.111129  | -2.012266 | -0.752410 |
| 35 | 6  | 0 | -2.183558 | 3.187657  | 0.508334  |
| 36 | 1  | 0 | -1.884425 | 3.655269  | 1.447645  |
| 37 | 1  | 0 | -2.012060 | 3.862039  | -0.326670 |
| 38 | 1  | 0 | -3.236330 | 2.901981  | 0.560285  |
| 39 | 1  | 0 | -0.666570 | -0.872448 | 1.578940  |
| 40 | 6  | 0 | 3.232896  | -1.394857 | 0.687015  |
| 41 | 8  | 0 | 2.256820  | -1.452062 | 1.463924  |
| 42 | 8  | 0 | 4.385847  | -0.956508 | 0.918357  |
| 43 | 8  | 0 | 3.056969  | -1.846363 | -0.604528 |

|    |    |   |          |           |           |
|----|----|---|----------|-----------|-----------|
| 44 | 19 | 0 | 3.620811 | -0.164816 | 3.354491  |
| 45 | 19 | 0 | 5.286242 | -0.712957 | -1.552109 |

---

**TS6**

---

| Center<br>Number | Atomic<br>Number | Atomic<br>Type | Coordinates (Angstroms) |           |           |
|------------------|------------------|----------------|-------------------------|-----------|-----------|
|                  |                  |                | X                       | Y         | Z         |
| 1                | 6                | 0              | 0.438488                | -0.903282 | -1.460691 |
| 2                | 6                | 0              | 0.944407                | 0.270524  | -0.957780 |
| 3                | 6                | 0              | 0.899530                | -0.706497 | 1.284298  |
| 4                | 6                | 0              | 0.358957                | -1.864720 | 0.780351  |
| 5                | 6                | 0              | 0.066681                | -1.942104 | -0.587507 |
| 6                | 1                | 0              | 0.348951                | -1.055753 | -2.529489 |
| 7                | 1                | 0              | 1.256972                | 1.081884  | -1.606991 |
| 8                | 1                | 0              | 1.165384                | -0.629663 | 2.331557  |
| 9                | 1                | 0              | 0.166696                | -2.723557 | 1.412455  |
| 10               | 7                | 0              | -0.535059               | -3.130343 | -1.102522 |
| 11               | 8                | 0              | -0.755209               | -3.206320 | -2.315332 |
| 12               | 8                | 0              | -0.838644               | -4.031829 | -0.322788 |
| 13               | 6                | 0              | 1.004858                | 0.443991  | 0.455962  |
| 14               | 6                | 0              | 4.326367                | 1.350912  | -1.541843 |
| 15               | 6                | 0              | 4.208437                | 0.720339  | -0.375850 |
| 16               | 6                | 0              | 3.881662                | 2.666697  | -1.858550 |
| 17               | 8                | 0              | 4.493798                | 3.724542  | -1.781973 |
| 18               | 8                | 0              | 2.639929                | 2.628677  | -2.477172 |
| 19               | 6                | 0              | 4.747983                | -0.657162 | -0.183489 |
| 20               | 6                | 0              | 5.713141                | -1.134278 | -1.088684 |
| 21               | 6                | 0              | 4.355396                | -1.518089 | 0.849890  |
| 22               | 6                | 0              | 6.270596                | -2.396628 | -0.962838 |
| 23               | 1                | 0              | 5.987483                | -0.463409 | -1.897371 |
| 24               | 6                | 0              | 4.902790                | -2.795520 | 0.989010  |
| 25               | 6                | 0              | 5.858421                | -3.211633 | 0.084701  |
| 26               | 1                | 0              | 7.018701                | -2.763549 | -1.658681 |
| 27               | 1                | 0              | 4.584416                | -3.465854 | 1.780471  |
| 28               | 9                | 0              | 6.410405                | -4.445008 | 0.215806  |
| 29               | 7                | 0              | 3.617232                | 1.249123  | 0.858890  |
| 30               | 16               | 0              | 2.061655                | 1.766398  | 1.068037  |
| 31               | 8                | 0              | 1.914680                | 1.830749  | 2.528118  |
| 32               | 8                | 0              | 1.829842                | 2.947286  | 0.254286  |
| 33               | 1                | 0              | 3.574805                | -1.213827 | 1.540147  |
| 34               | 1                | 0              | 3.946765                | 0.846045  | 1.728642  |
| 35               | 6                | 0              | 2.034553                | 3.891770  | -2.649691 |

|    |    |   |           |           |           |
|----|----|---|-----------|-----------|-----------|
| 36 | 1  | 0 | 2.499556  | 4.448829  | -3.473380 |
| 37 | 1  | 0 | 0.981229  | 3.695008  | -2.861264 |
| 38 | 1  | 0 | 2.123696  | 4.484646  | -1.734811 |
| 39 | 6  | 0 | -2.702231 | -1.023870 | -2.538854 |
| 40 | 6  | 0 | -2.840054 | 0.129595  | -1.769318 |
| 41 | 6  | 0 | -4.777841 | -0.867711 | -0.663853 |
| 42 | 6  | 0 | -4.617111 | -2.029166 | -1.406305 |
| 43 | 6  | 0 | -3.594653 | -2.068223 | -2.346141 |
| 44 | 1  | 0 | -1.912805 | -1.134242 | -3.270920 |
| 45 | 1  | 0 | -2.147192 | 0.965725  | -1.875173 |
| 46 | 1  | 0 | -5.591273 | -0.757391 | 0.045360  |
| 47 | 1  | 0 | -5.273325 | -2.882922 | -1.295343 |
| 48 | 7  | 0 | -3.504933 | -3.249515 | -3.218838 |
| 49 | 8  | 0 | -2.900028 | -3.133475 | -4.265511 |
| 50 | 8  | 0 | -4.090881 | -4.258707 | -2.861942 |
| 51 | 6  | 0 | -3.899241 | 0.196046  | -0.866553 |
| 52 | 6  | 0 | -0.860119 | 1.688416  | 0.825078  |
| 53 | 6  | 0 | -1.878406 | 1.218758  | 1.536788  |
| 54 | 6  | 0 | -0.937248 | 2.714362  | -0.193212 |
| 55 | 8  | 0 | -0.843934 | 2.547280  | -1.402365 |
| 56 | 8  | 0 | -1.043256 | 3.952258  | 0.345340  |
| 57 | 6  | 0 | -1.732628 | 0.238047  | 2.649182  |
| 58 | 6  | 0 | -2.570138 | -0.879222 | 2.746110  |
| 59 | 6  | 0 | -0.749394 | 0.430652  | 3.625784  |
| 60 | 6  | 0 | -2.434735 | -1.794528 | 3.785073  |
| 61 | 1  | 0 | -3.314990 | -1.055467 | 1.972956  |
| 62 | 6  | 0 | -0.605964 | -0.472610 | 4.675203  |
| 63 | 6  | 0 | -1.453390 | -1.567724 | 4.736814  |
| 64 | 1  | 0 | -3.059166 | -2.678054 | 3.857391  |
| 65 | 1  | 0 | 0.155391  | -0.341984 | 5.436627  |
| 66 | 9  | 0 | -1.321491 | -2.443498 | 5.758135  |
| 67 | 7  | 0 | -3.279426 | 1.616770  | 1.426437  |
| 68 | 16 | 0 | -4.188085 | 1.701976  | 0.056404  |
| 69 | 8  | 0 | -5.570472 | 1.651847  | 0.537618  |
| 70 | 8  | 0 | -3.747411 | 2.798229  | -0.784609 |
| 71 | 1  | 0 | -0.072569 | 1.275195  | 3.520804  |
| 72 | 1  | 0 | -3.871686 | 1.318477  | 2.194116  |
| 73 | 6  | 0 | -1.032769 | 4.996621  | -0.611015 |
| 74 | 1  | 0 | -1.841451 | 4.860846  | -1.334934 |
| 75 | 1  | 0 | -1.175949 | 5.920412  | -0.047276 |
| 76 | 1  | 0 | -0.077048 | 5.022059  | -1.140924 |

---

**Int10**

---

| Center<br>Number | Atomic<br>Number | Atomic<br>Type | Coordinates (Angstroms) |           |           |
|------------------|------------------|----------------|-------------------------|-----------|-----------|
|                  |                  |                | X                       | Y         | Z         |
| 1                | 6                | 0              | -0.489160               | 0.893570  | -1.419767 |
| 2                | 6                | 0              | -0.808506               | -0.338449 | -0.980601 |
| 3                | 6                | 0              | -0.640245               | 0.464250  | 1.336861  |
| 4                | 6                | 0              | -0.259572               | 1.679288  | 0.874668  |
| 5                | 6                | 0              | -0.021412               | 1.904599  | -0.511472 |
| 6                | 1                | 0              | -0.595079               | 1.154125  | -2.478619 |
| 7                | 1                | 0              | -1.223721               | -1.069319 | -1.667806 |
| 8                | 1                | 0              | -0.896461               | 0.346996  | 2.384854  |
| 9                | 1                | 0              | -0.196366               | 2.542018  | 1.561444  |
| 10               | 7                | 0              | 0.458096                | 3.088176  | -0.961069 |
| 11               | 8                | 0              | 0.493437                | 3.345374  | -2.192258 |
| 12               | 8                | 0              | 0.924212                | 3.930870  | -0.147451 |
| 13               | 6                | 0              | -0.494503               | -0.805739 | 0.464198  |
| 14               | 6                | 0              | -4.246743               | -1.156920 | -1.532849 |
| 15               | 6                | 0              | -4.042262               | -0.572639 | -0.356456 |
| 16               | 6                | 0              | -3.973152               | -2.493014 | -1.900609 |
| 17               | 8                | 0              | -4.678633               | -3.492369 | -1.737287 |
| 18               | 8                | 0              | -2.843725               | -2.592313 | -2.697017 |
| 19               | 6                | 0              | -4.483305               | 0.827041  | -0.060264 |
| 20               | 6                | 0              | -5.401576               | 1.443315  | -0.934226 |
| 21               | 6                | 0              | -4.027018               | 1.565118  | 1.029640  |
| 22               | 6                | 0              | -5.829033               | 2.750835  | -0.737020 |
| 23               | 1                | 0              | -5.747341               | 0.873610  | -1.780219 |
| 24               | 6                | 0              | -4.452335               | 2.873168  | 1.255103  |
| 25               | 6                | 0              | -5.349722               | 3.442737  | 0.368351  |
| 26               | 1                | 0              | -6.528257               | 3.228809  | -1.407727 |
| 27               | 1                | 0              | -4.091309               | 3.455505  | 2.102465  |
| 28               | 9                | 0              | -5.753670               | 4.714224  | 0.569466  |
| 29               | 7                | 0              | -3.436257               | -1.207545 | 0.824239  |
| 30               | 16               | 0              | -1.946836               | -1.919712 | 0.944062  |
| 31               | 8                | 0              | -1.815203               | -2.191906 | 2.386335  |
| 32               | 8                | 0              | -1.877061               | -3.048351 | 0.017887  |
| 33               | 1                | 0              | -3.276148               | 1.154268  | 1.696536  |
| 34               | 1                | 0              | -3.677903               | -0.811358 | 1.720940  |
| 35               | 6                | 0              | -2.465433               | -3.918558 | -3.022200 |
| 36               | 1                | 0              | -3.221014               | -4.417552 | -3.622440 |
| 37               | 1                | 0              | -1.538650               | -3.840521 | -3.592654 |
| 38               | 1                | 0              | -2.292401               | -4.502787 | -2.113760 |
| 39               | 6                | 0              | 2.628767                | 1.302868  | -2.512409 |

|    |    |   |           |           |           |
|----|----|---|-----------|-----------|-----------|
| 40 | 6  | 0 | 2.834836  | 0.082123  | -1.884956 |
| 41 | 6  | 0 | 4.537125  | 1.103284  | -0.462814 |
| 42 | 6  | 0 | 4.303900  | 2.332297  | -1.072045 |
| 43 | 6  | 0 | 3.372703  | 2.392513  | -2.092077 |
| 44 | 1  | 0 | 1.888022  | 1.424207  | -3.302809 |
| 45 | 1  | 0 | 2.263699  | -0.788856 | -2.177855 |
| 46 | 1  | 0 | 5.298210  | 1.001744  | 0.303435  |
| 47 | 1  | 0 | 4.852942  | 3.225057  | -0.781583 |
| 48 | 7  | 0 | 3.192843  | 3.669952  | -2.793097 |
| 49 | 8  | 0 | 2.773999  | 3.631027  | -3.940708 |
| 50 | 8  | 0 | 3.497339  | 4.689485  | -2.210661 |
| 51 | 6  | 0 | 3.800274  | -0.000060 | -0.894301 |
| 52 | 6  | 0 | 0.732704  | -1.595878 | 0.506683  |
| 53 | 6  | 0 | 1.796845  | -1.347633 | 1.337127  |
| 54 | 6  | 0 | 0.920064  | -2.656365 | -0.588906 |
| 55 | 8  | 0 | 0.864593  | -2.431899 | -1.778333 |
| 56 | 8  | 0 | 1.120680  | -3.895285 | -0.112174 |
| 57 | 6  | 0 | 1.645276  | -0.580961 | 2.602149  |
| 58 | 6  | 0 | 2.353213  | 0.609256  | 2.806443  |
| 59 | 6  | 0 | 0.808802  | -1.075738 | 3.601616  |
| 60 | 6  | 0 | 2.145285  | 1.349282  | 3.959723  |
| 61 | 1  | 0 | 3.004870  | 0.991356  | 2.035159  |
| 62 | 6  | 0 | 0.593856  | -0.353688 | 4.766845  |
| 63 | 6  | 0 | 1.250973  | 0.858322  | 4.915156  |
| 64 | 1  | 0 | 2.631400  | 2.305456  | 4.126217  |
| 65 | 1  | 0 | -0.070670 | -0.700782 | 5.547201  |
| 66 | 9  | 0 | 1.028458  | 1.593278  | 6.008417  |
| 67 | 7  | 0 | 3.171562  | -1.784901 | 1.189587  |
| 68 | 16 | 0 | 4.146954  | -1.593108 | -0.171692 |
| 69 | 8  | 0 | 5.516185  | -1.570780 | 0.348534  |
| 70 | 8  | 0 | 3.750724  | -2.604328 | -1.141233 |
| 71 | 1  | 0 | 0.273399  | -2.009104 | 3.437550  |
| 72 | 1  | 0 | 3.729949  | -1.598641 | 2.027193  |
| 73 | 6  | 0 | 1.189756  | -4.906878 | -1.134763 |
| 74 | 1  | 0 | 2.046499  | -4.708658 | -1.783743 |
| 75 | 1  | 0 | 1.315533  | -5.855378 | -0.607380 |
| 76 | 1  | 0 | 0.277331  | -4.906661 | -1.728917 |

---

**TS7**

---

| Center<br>Number | Atomic<br>Number | Atomic<br>Type | Coordinates (Angstroms) |   |   |
|------------------|------------------|----------------|-------------------------|---|---|
|                  |                  |                | X                       | Y | Z |

---

|    |    |   |           |           |           |
|----|----|---|-----------|-----------|-----------|
| 1  | 6  | 0 | 1.914679  | -2.951902 | 0.000699  |
| 2  | 6  | 0 | 0.576472  | -2.614495 | -0.130118 |
| 3  | 6  | 0 | 1.196520  | -0.486594 | -1.092920 |
| 4  | 6  | 0 | 2.542282  | -0.791398 | -0.941360 |
| 5  | 6  | 0 | 2.874166  | -2.017958 | -0.384238 |
| 6  | 1  | 0 | 2.222244  | -3.899727 | 0.424790  |
| 7  | 1  | 0 | -0.191894 | -3.299122 | 0.204990  |
| 8  | 1  | 0 | 0.915779  | 0.469750  | -1.516598 |
| 9  | 1  | 0 | 3.302179  | -0.079377 | -1.242211 |
| 10 | 7  | 0 | 4.283539  | -2.331634 | -0.173820 |
| 11 | 8  | 0 | 4.595724  | -3.486278 | 0.043578  |
| 12 | 8  | 0 | 5.092017  | -1.408698 | -0.221285 |
| 13 | 6  | 0 | 0.202571  | -1.365351 | -0.653922 |
| 14 | 6  | 0 | -1.221479 | -0.951000 | -0.702907 |
| 15 | 6  | 0 | -1.669061 | 0.134038  | -0.000296 |
| 16 | 6  | 0 | -2.128449 | -1.842699 | -1.461723 |
| 17 | 8  | 0 | -1.980125 | -3.045361 | -1.564564 |
| 18 | 8  | 0 | -3.121410 | -1.188532 | -2.084858 |
| 19 | 6  | 0 | -3.122335 | 0.406281  | 0.199046  |
| 20 | 6  | 0 | -3.963237 | -0.592745 | 0.700571  |
| 21 | 6  | 0 | -3.641196 | 1.680626  | -0.044882 |
| 22 | 6  | 0 | -5.309856 | -0.336936 | 0.929155  |
| 23 | 1  | 0 | -3.549857 | -1.571874 | 0.924359  |
| 24 | 6  | 0 | -4.988696 | 1.951409  | 0.171700  |
| 25 | 6  | 0 | -5.796613 | 0.932904  | 0.653184  |
| 26 | 1  | 0 | -5.977459 | -1.094974 | 1.322147  |
| 27 | 1  | 0 | -5.414547 | 2.928521  | -0.024581 |
| 28 | 9  | 0 | -7.098315 | 1.187309  | 0.869540  |
| 29 | 7  | 0 | -0.813204 | 0.944211  | 0.730542  |
| 30 | 16 | 0 | 0.113709  | -0.208525 | 2.385781  |
| 31 | 8  | 0 | -0.137139 | 0.823036  | 3.406829  |
| 32 | 8  | 0 | -0.838097 | -1.331334 | 2.436751  |
| 33 | 1  | 0 | -2.990387 | 2.464046  | -0.422421 |
| 34 | 1  | 0 | -1.353103 | 1.589059  | 1.307409  |
| 35 | 6  | 0 | -4.106003 | -2.019462 | -2.701769 |
| 36 | 1  | 0 | -4.832440 | -1.340550 | -3.143705 |
| 37 | 1  | 0 | -4.585772 | -2.655092 | -1.953528 |
| 38 | 1  | 0 | 0.135128  | 1.647691  | 0.186617  |
| 39 | 1  | 0 | -3.651939 | -2.648343 | -3.469160 |
| 40 | 6  | 0 | 2.214960  | 2.129623  | 0.126869  |
| 41 | 8  | 0 | 2.292139  | 1.589872  | 1.264677  |
| 42 | 8  | 0 | 3.231856  | 2.391388  | -0.607139 |
| 43 | 8  | 0 | 1.014491  | 2.435699  | -0.372475 |
| 44 | 19 | 0 | 4.846146  | 1.081429  | 1.039906  |

|    |    |   |          |          |           |
|----|----|---|----------|----------|-----------|
| 45 | 19 | 0 | 1.948655 | 3.551633 | -2.561388 |
|----|----|---|----------|----------|-----------|

---

### Int11

---

| Center<br>Number | Atomic<br>Number | Atomic<br>Type | Coordinates (Angstroms) |           |           |
|------------------|------------------|----------------|-------------------------|-----------|-----------|
|                  |                  |                | X                       | Y         | Z         |
| 1                | 6                | 0              | 1.700142                | -2.942642 | 0.566083  |
| 2                | 6                | 0              | 0.363085                | -2.617779 | 0.427977  |
| 3                | 6                | 0              | 0.913975                | -1.101009 | -1.386220 |
| 4                | 6                | 0              | 2.261381                | -1.402285 | -1.249209 |
| 5                | 6                | 0              | 2.633818                | -2.317501 | -0.267193 |
| 6                | 1                | 0              | 2.038334                | -3.647936 | 1.309343  |
| 7                | 1                | 0              | -0.370631               | -3.067066 | 1.076510  |
| 8                | 1                | 0              | 0.639793                | -0.360838 | -2.147832 |
| 9                | 1                | 0              | 2.987882                | -0.894368 | -1.893632 |
| 10               | 7                | 0              | 4.050461                | -2.603212 | -0.081510 |
| 11               | 8                | 0              | 4.359923                | -3.558660 | 0.609782  |
| 12               | 8                | 0              | 4.867156                | -1.882081 | -0.631522 |
| 13               | 6                | 0              | -0.051171               | -1.671085 | -0.550037 |
| 14               | 6                | 0              | -1.466763               | -1.243614 | -0.602941 |
| 15               | 6                | 0              | -1.849589               | 0.066211  | -0.546051 |
| 16               | 6                | 0              | -2.493378               | -2.325661 | -0.635411 |
| 17               | 8                | 0              | -2.400019               | -3.387791 | -0.053791 |
| 18               | 8                | 0              | -3.532366               | -2.016513 | -1.417579 |
| 19               | 6                | 0              | -3.229459               | 0.496990  | -0.224277 |
| 20               | 6                | 0              | -3.929313               | -0.083398 | 0.840906  |
| 21               | 6                | 0              | -3.822439               | 1.527784  | -0.960026 |
| 22               | 6                | 0              | -5.212367               | 0.347836  | 1.156269  |
| 23               | 1                | 0              | -3.458588               | -0.853632 | 1.441371  |
| 24               | 6                | 0              | -5.108806               | 1.966383  | -0.661880 |
| 25               | 6                | 0              | -5.777936               | 1.370053  | 0.393610  |
| 26               | 1                | 0              | -5.776347               | -0.067159 | 1.978440  |
| 27               | 1                | 0              | -5.586054               | 2.750378  | -1.234923 |
| 28               | 9                | 0              | -7.008696               | 1.790235  | 0.690760  |
| 29               | 7                | 0              | -0.962549               | 1.133591  | -0.585793 |
| 30               | 16               | 0              | 0.544059                | 0.833935  | 1.654931  |
| 31               | 8                | 0              | 0.470202                | 2.230555  | 2.039162  |
| 32               | 8                | 0              | -0.437503               | -0.038574 | 2.269557  |
| 33               | 1                | 0              | -3.275354               | 1.976531  | -1.793719 |
| 34               | 1                | 0              | -1.358870               | 2.057813  | -0.481538 |
| 35               | 6                | 0              | -4.631225               | -2.939949 | -1.368719 |
| 36               | 1                | 0              | -5.374424               | -2.555305 | -2.045701 |



|    |    |   |           |           |           |
|----|----|---|-----------|-----------|-----------|
| 37 | 1  | 0 | -5.021299 | -2.991286 | -0.350097 |
| 38 | 1  | 0 | -0.315130 | 1.044001  | -1.075901 |
| 39 | 1  | 0 | -4.302741 | -3.935012 | -1.676550 |
| 40 | 6  | 0 | 2.406854  | 1.972059  | 0.168673  |
| 41 | 8  | 0 | 2.119281  | 0.895696  | 0.838422  |
| 42 | 8  | 0 | 3.612264  | 2.060393  | -0.387580 |
| 43 | 8  | 0 | 1.546497  | 2.915530  | 0.004412  |
| 44 | 19 | 0 | 4.403563  | -0.241873 | 0.446661  |
| 45 | 19 | 0 | 3.009439  | 4.400471  | -1.389116 |

---

## TS8

| Center<br>Number | Atomic<br>Number | Atomic<br>Type | Coordinates (Angstroms) |           |           |
|------------------|------------------|----------------|-------------------------|-----------|-----------|
|                  |                  |                | X                       | Y         | Z         |
| 1                | 6                | 0              | -4.993880               | 0.354499  | 0.647928  |
| 2                | 6                | 0              | -3.712964               | 0.392465  | 1.154660  |
| 3                | 6                | 0              | -2.830102               | 0.210408  | -1.095885 |
| 4                | 6                | 0              | -4.108845               | 0.172550  | -1.603763 |
| 5                | 6                | 0              | -5.198317               | 0.240931  | -0.730383 |
| 6                | 1                | 0              | -5.850913               | 0.408172  | 1.308645  |
| 7                | 1                | 0              | -3.561524               | 0.477447  | 2.220686  |
| 8                | 1                | 0              | -2.002172               | 0.164606  | -1.794688 |
| 9                | 1                | 0              | -4.281970               | 0.096014  | -2.670250 |
| 10               | 7                | 0              | -6.532519               | 0.198898  | -1.253421 |
| 11               | 8                | 0              | -7.476076               | 0.259791  | -0.468613 |
| 12               | 8                | 0              | -6.686543               | 0.103158  | -2.468956 |
| 13               | 6                | 0              | -2.570450               | 0.311246  | 0.304184  |
| 14               | 6                | 0              | -1.227904               | 0.348944  | 0.797789  |
| 15               | 6                | 0              | -0.107475               | 0.115771  | -0.141161 |
| 16               | 6                | 0              | -0.884207               | 0.428472  | 2.180512  |
| 17               | 8                | 0              | -1.624988               | 0.511816  | 3.154523  |
| 18               | 8                | 0              | 0.483387                | 0.341776  | 2.374840  |
| 19               | 6                | 0              | 0.863380                | 0.001769  | 3.706852  |
| 20               | 1                | 0              | 0.758712                | 0.855398  | 4.380463  |
| 21               | 1                | 0              | 0.252572                | -0.822873 | 4.077213  |
| 22               | 1                | 0              | 1.904569                | -0.319156 | 3.655089  |
| 23               | 6                | 0              | 0.798564                | 1.226737  | -0.534770 |
| 24               | 6                | 0              | 0.528484                | 2.517929  | -0.056616 |
| 25               | 6                | 0              | 1.908387                | 1.028414  | -1.372782 |
| 26               | 6                | 0              | 1.351979                | 3.587572  | -0.385013 |
| 27               | 1                | 0              | -0.338114               | 2.674534  | 0.576124  |

|    |    |   |           |           |           |
|----|----|---|-----------|-----------|-----------|
| 28 | 6  | 0 | 2.737942  | 2.088436  | -1.713384 |
| 29 | 6  | 0 | 2.441531  | 3.351493  | -1.213947 |
| 30 | 1  | 0 | 1.158232  | 4.589787  | -0.021539 |
| 31 | 1  | 0 | 3.603147  | 1.950149  | -2.351132 |
| 32 | 9  | 0 | 3.238737  | 4.373102  | -1.537840 |
| 33 | 7  | 0 | 0.031128  | -1.066842 | -0.631757 |
| 34 | 16 | 0 | -0.779338 | -2.638643 | 0.195556  |
| 35 | 8  | 0 | -0.399220 | -3.616705 | -0.842331 |
| 36 | 8  | 0 | 0.117564  | -2.668148 | 1.391562  |
| 37 | 1  | 0 | 2.153257  | 0.040928  | -1.749386 |
| 38 | 1  | 0 | 0.821096  | -1.321564 | -1.234788 |
| 39 | 1  | 0 | 1.689852  | -1.935360 | 1.250120  |
| 40 | 6  | 0 | 3.166079  | -1.434193 | 0.080960  |
| 41 | 8  | 0 | 2.520754  | -1.401568 | 1.281589  |
| 42 | 8  | 0 | 4.184277  | -0.702375 | 0.014343  |
| 43 | 8  | 0 | 2.679895  | -2.136794 | -0.841934 |
| 44 | 19 | 0 | 3.143941  | 1.196445  | 1.622119  |
| 45 | 19 | 0 | 4.917015  | -1.886464 | -2.287905 |

## Int12

| Center<br>Number | Atomic<br>Number | Atomic<br>Type | Coordinates (Angstroms) |           |           |
|------------------|------------------|----------------|-------------------------|-----------|-----------|
|                  |                  |                | X                       | Y         | Z         |
| 1                | 6                | 0              | -3.059304               | -1.345512 | -2.228642 |
| 2                | 6                | 0              | -1.717409               | -0.987251 | -2.219282 |
| 3                | 6                | 0              | -1.903126               | -0.327952 | 0.103584  |
| 4                | 6                | 0              | -3.245596               | -0.687685 | 0.112860  |
| 5                | 6                | 0              | -3.796059               | -1.182461 | -1.065229 |
| 6                | 1                | 0              | -3.529049               | -1.735502 | -3.119609 |
| 7                | 1                | 0              | -1.127323               | -1.099988 | -3.117300 |
| 8                | 1                | 0              | -1.422187               | 0.031991  | 1.005366  |
| 9                | 1                | 0              | -3.850105               | -0.591942 | 1.000728  |
| 10               | 7                | 0              | -5.211433               | -1.556977 | -1.067441 |
| 11               | 8                | 0              | -5.690794               | -1.991036 | -2.103454 |
| 12               | 8                | 0              | -5.844084               | -1.418891 | -0.038097 |
| 13               | 6                | 0              | -1.121697               | -0.464878 | -1.057487 |
| 14               | 6                | 0              | 0.316955                | -0.127758 | -1.033335 |
| 15               | 6                | 0              | 0.814859                | 0.985269  | -0.371944 |
| 16               | 6                | 0              | 1.211866                | -1.217072 | -1.475470 |
| 17               | 8                | 0              | 0.943221                | -2.411066 | -1.395284 |
| 18               | 8                | 0              | 2.371928                | -0.773543 | -1.984354 |
| 19               | 6                | 0              | 3.386103                | -1.734655 | -2.226274 |

|    |    |   |           |           |           |
|----|----|---|-----------|-----------|-----------|
| 20 | 1  | 0 | 3.829231  | -2.064636 | -1.269943 |
| 21 | 1  | 0 | 2.989220  | -2.584331 | -2.783393 |
| 22 | 1  | 0 | 4.159878  | -1.208599 | -2.794604 |
| 23 | 6  | 0 | -0.089731 | 2.113938  | -0.011308 |
| 24 | 6  | 0 | -0.937528 | 2.664968  | -0.977542 |
| 25 | 6  | 0 | -0.064973 | 2.660731  | 1.274678  |
| 26 | 6  | 0 | -1.760847 | 3.742286  | -0.661389 |
| 27 | 1  | 0 | -0.959006 | 2.247144  | -1.972761 |
| 28 | 6  | 0 | -0.890195 | 3.732343  | 1.606217  |
| 29 | 6  | 0 | -1.724931 | 4.247876  | 0.623621  |
| 30 | 1  | 0 | -2.422951 | 4.189885  | -1.403097 |
| 31 | 1  | 0 | -0.893514 | 4.160595  | 2.605044  |
| 32 | 9  | 0 | -2.520357 | 5.286697  | 0.937429  |
| 33 | 7  | 0 | 2.141851  | 1.045253  | 0.025150  |
| 34 | 16 | 0 | 3.415594  | 1.729069  | -1.334639 |
| 35 | 8  | 0 | 3.579051  | 3.092495  | -0.746785 |
| 36 | 8  | 0 | 4.604863  | 0.865984  | -1.091371 |
| 37 | 1  | 0 | 0.565197  | 2.198041  | 2.030697  |
| 38 | 1  | 0 | 2.241433  | 1.872698  | 0.612547  |
| 39 | 1  | 0 | 2.332418  | -0.227964 | 0.710099  |
| 40 | 6  | 0 | 1.468253  | -1.051080 | 2.005478  |
| 41 | 8  | 0 | 2.415533  | -0.884492 | 1.021329  |
| 42 | 8  | 0 | 1.270134  | -2.252543 | 2.415450  |
| 43 | 8  | 0 | 0.883394  | -0.021580 | 2.435484  |
| 44 | 19 | 0 | 2.324674  | -3.668320 | 0.541466  |
| 45 | 19 | 0 | -0.744583 | -1.416941 | 3.996170  |

---

## TS9

---

| Center<br>Number | Atomic<br>Number | Atomic<br>Type | Coordinates (Angstroms) |           |           |
|------------------|------------------|----------------|-------------------------|-----------|-----------|
|                  |                  |                | X                       | Y         | Z         |
| 1                | 6                | 0              | -2.986858               | -1.138605 | -2.346158 |
| 2                | 6                | 0              | -1.634584               | -0.834243 | -2.277181 |
| 3                | 6                | 0              | -1.857406               | -0.308819 | 0.072794  |
| 4                | 6                | 0              | -3.210732               | -0.605584 | 0.022513  |
| 5                | 6                | 0              | -3.752316               | -1.012119 | -1.192657 |
| 6                | 1                | 0              | -3.449897               | -1.462363 | -3.269538 |
| 7                | 1                | 0              | -1.019758               | -0.924718 | -3.166875 |
| 8                | 1                | 0              | -1.385558               | -0.015355 | 1.006784  |
| 9                | 1                | 0              | -3.840289               | -0.540970 | 0.901082  |
| 10               | 7                | 0              | -5.178357               | -1.330982 | -1.255946 |
| 11               | 8                | 0              | -5.639659               | -1.693571 | -2.325901 |

|    |    |   |           |           |           |
|----|----|---|-----------|-----------|-----------|
| 12 | 8  | 0 | -5.837837 | -1.218626 | -0.235027 |
| 13 | 6  | 0 | -1.056053 | -0.401625 | -1.076377 |
| 14 | 6  | 0 | 0.393575  | -0.106313 | -0.983289 |
| 15 | 6  | 0 | 0.867979  | 0.980751  | -0.298166 |
| 16 | 6  | 0 | 1.280936  | -1.201379 | -1.428545 |
| 17 | 8  | 0 | 0.952680  | -2.377828 | -1.478414 |
| 18 | 8  | 0 | 2.485251  | -0.780544 | -1.817781 |
| 19 | 6  | 0 | 3.458845  | -1.781875 | -2.108493 |
| 20 | 1  | 0 | 3.754359  | -2.286925 | -1.185220 |
| 21 | 1  | 0 | 3.065490  | -2.504830 | -2.823952 |
| 22 | 1  | 0 | 4.314285  | -1.245566 | -2.511158 |
| 23 | 6  | 0 | -0.022069 | 2.119597  | 0.057149  |
| 24 | 6  | 0 | -0.810474 | 2.730669  | -0.923536 |
| 25 | 6  | 0 | -0.047285 | 2.610310  | 1.368137  |
| 26 | 6  | 0 | -1.614898 | 3.819583  | -0.607963 |
| 27 | 1  | 0 | -0.787390 | 2.352477  | -1.940900 |
| 28 | 6  | 0 | -0.854590 | 3.692530  | 1.699535  |
| 29 | 6  | 0 | -1.620924 | 4.277244  | 0.701535  |
| 30 | 1  | 0 | -2.225965 | 4.314739  | -1.353595 |
| 31 | 1  | 0 | -0.902761 | 4.081671  | 2.710187  |
| 32 | 9  | 0 | -2.399220 | 5.326358  | 1.015106  |
| 33 | 7  | 0 | 2.189768  | 1.074962  | 0.123356  |
| 34 | 16 | 0 | 3.648731  | 1.746822  | -1.285065 |
| 35 | 8  | 0 | 3.823427  | 3.086070  | -0.689290 |
| 36 | 8  | 0 | 4.742059  | 0.814517  | -0.962835 |
| 37 | 1  | 0 | 0.531586  | 2.092931  | 2.127676  |
| 38 | 1  | 0 | 2.280109  | 1.852678  | 0.775997  |
| 39 | 1  | 0 | 2.432176  | -0.071850 | 0.685631  |
| 40 | 6  | 0 | 1.277818  | -1.287192 | 1.986650  |
| 41 | 8  | 0 | 2.331926  | -1.274896 | 1.167945  |
| 42 | 8  | 0 | 0.803582  | -2.429231 | 2.305667  |
| 43 | 8  | 0 | 0.794844  | -0.191760 | 2.406534  |
| 44 | 19 | 0 | 1.966883  | -3.872956 | 0.514656  |
| 45 | 19 | 0 | -0.974723 | -1.417928 | 3.929251  |

---

### Int13

---

| Center<br>Number | Atomic<br>Number | Atomic<br>Type | Coordinates (Angstroms) |          |          |
|------------------|------------------|----------------|-------------------------|----------|----------|
|                  |                  |                | X                       | Y        | Z        |
| 1                | 6                | 0              | -0.778100               | 3.126663 | 1.336892 |
| 2                | 6                | 0              | -0.132838               | 1.949599 | 1.679141 |
| 3                | 6                | 0              | -1.465757               | 0.739545 | 0.072051 |

|    |    |   |           |           |           |
|----|----|---|-----------|-----------|-----------|
| 4  | 6  | 0 | -2.122135 | 1.907616  | -0.280899 |
| 5  | 6  | 0 | -1.768500 | 3.089351  | 0.360847  |
| 6  | 1  | 0 | -0.532429 | 4.063949  | 1.819985  |
| 7  | 1  | 0 | 0.619101  | 1.955141  | 2.456931  |
| 8  | 1  | 0 | -1.727939 | -0.182386 | -0.434187 |
| 9  | 1  | 0 | -2.885236 | 1.915129  | -1.048671 |
| 10 | 7  | 0 | -2.453599 | 4.323632  | -0.002302 |
| 11 | 8  | 0 | -2.109500 | 5.358256  | 0.548745  |
| 12 | 8  | 0 | -3.339772 | 4.266204  | -0.841546 |
| 13 | 6  | 0 | -0.466124 | 0.728988  | 1.062996  |
| 14 | 6  | 0 | 0.260407  | -0.518185 | 1.391597  |
| 15 | 6  | 0 | -0.355588 | -1.759258 | 1.361671  |
| 16 | 6  | 0 | 1.686526  | -0.373374 | 1.711976  |
| 17 | 8  | 0 | 2.389642  | 0.557291  | 1.369283  |
| 18 | 8  | 0 | 2.195675  | -1.382055 | 2.469314  |
| 19 | 6  | 0 | 3.620987  | -1.363610 | 2.598536  |
| 20 | 1  | 0 | 4.089443  | -1.391639 | 1.612554  |
| 21 | 1  | 0 | 3.945551  | -0.466641 | 3.127323  |
| 22 | 1  | 0 | 3.887112  | -2.256329 | 3.163021  |
| 23 | 6  | 0 | -1.740008 | -1.978486 | 0.863546  |
| 24 | 6  | 0 | -2.742750 | -1.037502 | 1.132636  |
| 25 | 6  | 0 | -2.067120 | -3.150855 | 0.171200  |
| 26 | 6  | 0 | -4.042591 | -1.242255 | 0.694612  |
| 27 | 1  | 0 | -2.499499 | -0.144330 | 1.700141  |
| 28 | 6  | 0 | -3.366179 | -3.364425 | -0.283659 |
| 29 | 6  | 0 | -4.327968 | -2.403897 | -0.012333 |
| 30 | 1  | 0 | -4.833361 | -0.529734 | 0.898488  |
| 31 | 1  | 0 | -3.636482 | -4.255957 | -0.837813 |
| 32 | 9  | 0 | -5.581673 | -2.603764 | -0.442347 |
| 33 | 7  | 0 | 0.238939  | -2.856980 | 1.874846  |
| 34 | 16 | 0 | 4.001824  | -0.598960 | -0.602948 |
| 35 | 8  | 0 | 4.590711  | -1.226333 | -1.815261 |
| 36 | 8  | 0 | 4.735435  | 0.636623  | -0.197979 |
| 37 | 1  | 0 | -1.289836 | -3.877182 | -0.061594 |
| 38 | 1  | 0 | -0.264568 | -3.730454 | 1.899536  |
| 39 | 6  | 0 | 1.437102  | -0.438353 | -1.533552 |
| 40 | 8  | 0 | 2.580183  | 0.263028  | -1.292184 |
| 41 | 8  | 0 | 0.454869  | 0.288098  | -1.864579 |
| 42 | 8  | 0 | 1.436481  | -1.682709 | -1.396333 |
| 43 | 19 | 0 | 1.651924  | 2.644019  | -1.016923 |
| 44 | 19 | 0 | -1.002426 | -1.881900 | -2.428757 |
| 45 | 1  | 0 | 1.250198  | -2.925744 | 1.893450  |

---

**P**

---

| Center<br>Number | Atomic<br>Number | Atomic<br>Type | Coordinates (Angstroms) |           |           |
|------------------|------------------|----------------|-------------------------|-----------|-----------|
|                  |                  |                | X                       | Y         | Z         |
| 1                | 6                | 0              | -2.282735               | 0.034259  | -0.990749 |
| 2                | 6                | 0              | -0.898088               | -0.096654 | -1.004472 |
| 3                | 6                | 0              | -1.022595               | -1.741599 | 0.766053  |
| 4                | 6                | 0              | -2.402304               | -1.634126 | 0.778905  |
| 5                | 6                | 0              | -3.008532               | -0.740549 | -0.099412 |
| 6                | 1                | 0              | -2.790162               | 0.702974  | -1.669881 |
| 7                | 1                | 0              | -0.305184               | 0.489721  | -1.691451 |
| 8                | 1                | 0              | -0.537962               | -2.428933 | 1.446930  |
| 9                | 1                | 0              | -3.018077               | -2.214831 | 1.460360  |
| 10               | 7                | 0              | -4.469527               | -0.610108 | -0.079042 |
| 11               | 8                | 0              | -4.979779               | 0.181945  | -0.849338 |
| 12               | 8                | 0              | -5.100416               | -1.304922 | 0.701215  |
| 13               | 6                | 0              | -0.254688               | -0.968994 | -0.117590 |
| 14               | 6                | 0              | 1.232844                | -1.096567 | -0.109810 |
| 15               | 6                | 0              | 2.048545                | -0.026138 | -0.162861 |
| 16               | 6                | 0              | 1.750000                | -2.497955 | -0.145153 |
| 17               | 8                | 0              | 1.123415                | -3.434521 | -0.619065 |
| 18               | 8                | 0              | 2.911816                | -2.643787 | 0.486344  |
| 19               | 6                | 0              | 1.601648                | 1.376181  | 0.011295  |
| 20               | 6                | 0              | 0.883476                | 1.756336  | 1.148276  |
| 21               | 6                | 0              | 1.906474                | 2.315174  | -0.981007 |
| 22               | 6                | 0              | 0.476190                | 3.076659  | 1.301539  |
| 23               | 1                | 0              | 0.665279                | 1.024824  | 1.913463  |
| 24               | 6                | 0              | 1.495854                | 3.632616  | -0.833774 |
| 25               | 6                | 0              | 0.783286                | 3.986262  | 0.307406  |
| 26               | 1                | 0              | -0.067950               | 3.408091  | 2.182913  |
| 27               | 1                | 0              | 1.705601                | 4.394624  | -1.587214 |
| 28               | 9                | 0              | 0.390877                | 5.271035  | 0.452420  |
| 29               | 7                | 0              | 3.441842                | -0.132645 | -0.277922 |
| 30               | 1                | 0              | 2.431239                | 1.976802  | -1.874684 |
| 31               | 6                | 0              | 3.555093                | -3.907731 | 0.309643  |
| 32               | 1                | 0              | 4.455883                | -3.880093 | 0.933139  |
| 33               | 1                | 0              | 3.830409                | -4.016371 | -0.744921 |
| 34               | 1                | 0              | 2.895128                | -4.723558 | 0.623920  |
| 35               | 1                | 0              | 3.854856                | 0.690319  | -0.714345 |
| 36               | 1                | 0              | 3.729751                | -0.856378 | -0.674238 |

---

**Ps**

---

| Center<br>Number | Atomic<br>Number | Atomic<br>Type | Coordinates (Angstroms) |           |           |
|------------------|------------------|----------------|-------------------------|-----------|-----------|
|                  |                  |                | X                       | Y         | Z         |
| 1                | 6                | 0              | -3.525113               | 0.455582  | 1.094641  |
| 2                | 6                | 0              | -2.147814               | 0.603720  | 1.011492  |
| 3                | 6                | 0              | -2.136127               | -0.591965 | -1.091402 |
| 4                | 6                | 0              | -3.514278               | -0.757667 | -1.019643 |
| 5                | 6                | 0              | -4.180322               | -0.227294 | 0.076234  |
| 6                | 1                | 0              | -4.088830               | 0.850944  | 1.929961  |
| 7                | 1                | 0              | -1.605497               | 1.119127  | 1.794440  |
| 8                | 1                | 0              | -1.594253               | -0.975344 | -1.950923 |
| 9                | 1                | 0              | -4.066039               | -1.273593 | -1.794808 |
| 10               | 7                | 0              | -5.634754               | -0.393655 | 0.162258  |
| 11               | 8                | 0              | -6.210553               | 0.093596  | 1.120171  |
| 12               | 8                | 0              | -6.193730               | -1.011222 | -0.728260 |
| 13               | 6                | 0              | -1.439222               | 0.078553  | -0.077638 |
| 14               | 6                | 0              | 0.038955                | 0.234839  | -0.160484 |
| 15               | 6                | 0              | 0.860580                | -0.842216 | -0.039654 |
| 16               | 6                | 0              | 0.522726                | 1.627985  | -0.301178 |
| 17               | 8                | 0              | -0.096007               | 2.595510  | 0.095102  |
| 18               | 8                | 0              | 1.688971                | 1.731945  | -0.950835 |
| 19               | 6                | 0              | 2.342897                | -0.777151 | 0.083567  |
| 20               | 6                | 0              | 2.929304                | -0.004086 | 1.090904  |
| 21               | 6                | 0              | 3.150646                | -1.533488 | -0.768533 |
| 22               | 6                | 0              | 4.310059                | 0.032088  | 1.234683  |
| 23               | 1                | 0              | 2.293462                | 0.555574  | 1.769982  |
| 24               | 6                | 0              | 4.535961                | -1.501914 | -0.639899 |
| 25               | 6                | 0              | 5.086327                | -0.716557 | 0.360633  |
| 26               | 1                | 0              | 4.788493                | 0.619715  | 2.009433  |
| 27               | 1                | 0              | 5.183815                | -2.069084 | -1.297739 |
| 28               | 9                | 0              | 6.421768                | -0.682805 | 0.494190  |
| 29               | 7                | 0              | 0.354609                | -2.109026 | 0.183916  |
| 30               | 1                | 0              | 2.700754                | -2.135035 | -1.553166 |
| 31               | 1                | 0              | 1.000870                | -2.878201 | 0.060041  |
| 32               | 6                | 0              | 2.242599                | 3.048797  | -1.007144 |
| 33               | 1                | 0              | 3.188923                | 2.948589  | -1.534445 |
| 34               | 1                | 0              | 2.406078                | 3.434150  | 0.001430  |
| 35               | 1                | 0              | -0.587898               | -2.308288 | -0.128888 |
| 36               | 1                | 0              | 1.572699                | 3.721469  | -1.545140 |

---

**Int14**

---

| Center<br>Number | Atomic<br>Number | Atomic<br>Type | Coordinates (Angstroms) |           |           |
|------------------|------------------|----------------|-------------------------|-----------|-----------|
|                  |                  |                | X                       | Y         | Z         |
| 1                | 6                | 0              | -3.803008               | -0.870689 | -0.980014 |
| 2                | 6                | 0              | -2.436481               | -0.677885 | -0.839304 |
| 3                | 6                | 0              | -2.707679               | -0.335866 | 1.541781  |
| 4                | 6                | 0              | -4.080357               | -0.513211 | 1.416703  |
| 5                | 6                | 0              | -4.598476               | -0.781779 | 0.156961  |
| 6                | 1                | 0              | -4.253060               | -1.076648 | -1.942908 |
| 7                | 1                | 0              | -1.778520               | -0.686266 | -1.703511 |
| 8                | 1                | 0              | -2.280767               | -0.130392 | 2.517990  |
| 9                | 1                | 0              | -4.740133               | -0.453380 | 2.272786  |
| 10               | 7                | 0              | -6.043673               | -0.988218 | 0.021988  |
| 11               | 8                | 0              | -6.481420               | -1.264880 | -1.082153 |
| 12               | 8                | 0              | -6.734572               | -0.874158 | 1.020266  |
| 13               | 6                | 0              | -1.882141               | -0.410916 | 0.416564  |
| 14               | 6                | 0              | -0.376938               | -0.281025 | 0.514458  |
| 15               | 6                | 0              | 0.246164                | 1.093249  | 0.781438  |
| 16               | 6                | 0              | 0.117554                | -1.281739 | 1.549879  |
| 17               | 8                | 0              | 0.449784                | -2.423645 | 1.288909  |
| 18               | 8                | 0              | 0.112199                | -0.787409 | 2.781344  |
| 19               | 6                | 0              | 1.740715                | 1.037306  | 0.931242  |
| 20               | 6                | 0              | 2.496746                | 0.020684  | 0.339249  |
| 21               | 6                | 0              | 2.402121                | 2.031190  | 1.663540  |
| 22               | 6                | 0              | 3.886628                | 0.014765  | 0.430323  |
| 23               | 1                | 0              | 2.040321                | -0.783131 | -0.232060 |
| 24               | 6                | 0              | 3.786638                | 2.031490  | 1.780138  |
| 25               | 6                | 0              | 4.506105                | 1.023730  | 1.150326  |
| 26               | 1                | 0              | 4.464241                | -0.760077 | -0.062849 |
| 27               | 1                | 0              | 4.310608                | 2.790945  | 2.349322  |
| 28               | 9                | 0              | 5.845354                | 1.027689  | 1.249317  |
| 29               | 7                | 0              | -0.267199               | 2.253804  | 0.854934  |
| 30               | 16               | 0              | -1.973937               | 2.759485  | 0.840121  |
| 31               | 8                | 0              | -1.713380               | 4.245835  | 0.847855  |
| 32               | 8                | 0              | -2.486819               | 2.320219  | -0.520295 |
| 33               | 1                | 0              | 1.815253                | 2.802135  | 2.151918  |
| 34               | 1                | 0              | -1.403446               | 2.773818  | -1.662398 |
| 35               | 6                | 0              | 0.526978                | -1.679544 | 3.828117  |
| 36               | 1                | 0              | 0.413108                | -1.118823 | 4.752086  |
| 37               | 1                | 0              | 1.569319                | -1.966442 | 3.680325  |
| 38               | 1                | 0              | 0.036344                | -0.612773 | -0.448972 |
| 39               | 6                | 0              | 0.360981                | 2.175239  | -2.161608 |



|    |    |   |           |           |           |
|----|----|---|-----------|-----------|-----------|
| 40 | 8  | 0 | -0.049429 | 0.994645  | -2.220173 |
| 41 | 8  | 0 | 1.554444  | 2.573987  | -2.166174 |
| 42 | 8  | 0 | -0.581666 | 3.170808  | -2.070335 |
| 43 | 19 | 0 | 2.290771  | -0.088930 | -2.773174 |
| 44 | 19 | 0 | 0.803078  | 4.567961  | -0.303281 |
| 45 | 1  | 0 | -0.105092 | -2.568310 | 3.832348  |
| 46 | 6  | 0 | 1.751922  | -2.878716 | -1.583011 |
| 47 | 8  | 0 | 2.943927  | -2.383100 | -1.466992 |
| 48 | 8  | 0 | 1.528960  | -4.106410 | -1.246082 |
| 49 | 8  | 0 | 0.778287  | -2.123174 | -1.979834 |
| 50 | 19 | 0 | 2.990237  | -3.645577 | 0.865785  |
| 51 | 19 | 0 | -0.985382 | -3.649779 | -0.812473 |

### TS10

| Center<br>Number | Atomic<br>Number | Atomic<br>Type | Coordinates (Angstroms) |           |           |
|------------------|------------------|----------------|-------------------------|-----------|-----------|
|                  |                  |                | X                       | Y         | Z         |
| 1                | 6                | 0              | -3.644125               | -0.713318 | 0.692450  |
| 2                | 6                | 0              | -2.274831               | -0.526067 | 0.566431  |
| 3                | 6                | 0              | -2.609698               | 0.460818  | -1.620797 |
| 4                | 6                | 0              | -3.983423               | 0.288593  | -1.504746 |
| 5                | 6                | 0              | -4.474841               | -0.294173 | -0.342158 |
| 6                | 1                | 0              | -4.072734               | -1.168677 | 1.576432  |
| 7                | 1                | 0              | -1.593266               | -0.855193 | 1.347966  |
| 8                | 1                | 0              | -2.211371               | 0.907612  | -2.527391 |
| 9                | 1                | 0              | -4.663006               | 0.594230  | -2.289928 |
| 10               | 7                | 0              | -5.922376               | -0.460809 | -0.198699 |
| 11               | 8                | 0              | -6.341661               | -0.972722 | 0.825871  |
| 12               | 8                | 0              | -6.636685               | -0.075713 | -1.109868 |
| 13               | 6                | 0              | -1.743034               | 0.067023  | -0.589436 |
| 14               | 6                | 0              | -0.268933               | 0.362669  | -0.626968 |
| 15               | 6                | 0              | 0.699447                | -0.777064 | -0.748128 |
| 16               | 6                | 0              | 0.020537                | 1.532484  | -1.522932 |
| 17               | 8                | 0              | -0.265826               | 2.684599  | -1.223274 |
| 18               | 8                | 0              | 0.591411                | 1.218995  | -2.682781 |
| 19               | 6                | 0              | 2.150548                | -0.378245 | -0.810586 |
| 20               | 6                | 0              | 2.635079                | 0.791001  | -0.218014 |
| 21               | 6                | 0              | 3.043443                | -1.190517 | -1.521295 |
| 22               | 6                | 0              | 3.989711                | 1.114437  | -0.275411 |
| 23               | 1                | 0              | 1.982774                | 1.470984  | 0.325889  |
| 24               | 6                | 0              | 4.394528                | -0.876835 | -1.601834 |
| 25               | 6                | 0              | 4.846229                | 0.270076  | -0.962680 |

|    |    |   |           |           |           |
|----|----|---|-----------|-----------|-----------|
| 26 | 1  | 0 | 4.374959  | 2.008556  | 0.203141  |
| 27 | 1  | 0 | 5.092270  | -1.494466 | -2.155933 |
| 28 | 9  | 0 | 6.152785  | 0.575694  | -1.026673 |
| 29 | 7  | 0 | 0.508114  | -2.043330 | -0.739079 |
| 30 | 16 | 0 | -0.982303 | -2.920800 | -1.105930 |
| 31 | 8  | 0 | -0.302996 | -4.122641 | -1.717134 |
| 32 | 8  | 0 | -1.534462 | -3.278734 | 0.268158  |
| 33 | 1  | 0 | 2.658344  | -2.060695 | -2.042611 |
| 34 | 1  | 0 | -0.447079 | -3.578320 | 1.378015  |
| 35 | 6  | 0 | 0.956987  | 2.313830  | -3.533086 |
| 36 | 1  | 0 | 1.323661  | 1.863107  | -4.452029 |
| 37 | 1  | 0 | 1.745331  | 2.903535  | -3.060026 |
| 38 | 1  | 0 | -0.116439 | 0.896773  | 0.516124  |
| 39 | 6  | 0 | 0.920240  | -2.501870 | 2.206220  |
| 40 | 8  | 0 | 0.086571  | -1.626495 | 2.537307  |
| 41 | 8  | 0 | 2.172324  | -2.387052 | 2.170146  |
| 42 | 8  | 0 | 0.433089  | -3.734021 | 1.841557  |
| 43 | 19 | 0 | 1.839535  | 0.302491  | 2.781459  |
| 44 | 19 | 0 | 2.153052  | -4.162495 | -0.089189 |
| 45 | 1  | 0 | 0.090582  | 2.945962  | -3.730517 |
| 46 | 6  | 0 | 0.296132  | 2.794090  | 1.764796  |
| 47 | 8  | 0 | 1.574126  | 2.847102  | 1.802819  |
| 48 | 8  | 0 | -0.424879 | 3.845884  | 1.764998  |
| 49 | 8  | 0 | -0.292142 | 1.608691  | 1.680605  |
| 50 | 19 | 0 | 1.252711  | 4.758419  | -0.068118 |
| 51 | 19 | 0 | -2.514632 | 2.794342  | 0.693326  |

---

### Int15

---

| Center<br>Number | Atomic<br>Number | Atomic<br>Type | Coordinates (Angstroms) |           |           |
|------------------|------------------|----------------|-------------------------|-----------|-----------|
|                  |                  |                | X                       | Y         | Z         |
| 1                | 6                | 0              | -3.568216               | -0.925133 | 0.629285  |
| 2                | 6                | 0              | -2.210985               | -0.664300 | 0.506317  |
| 3                | 6                | 0              | -2.604571               | 0.370305  | -1.647971 |
| 4                | 6                | 0              | -3.966853               | 0.124951  | -1.534432 |
| 5                | 6                | 0              | -4.424749               | -0.517851 | -0.389190 |
| 6                | 1                | 0              | -3.968696               | -1.427936 | 1.500677  |
| 7                | 1                | 0              | -1.522459               | -0.986287 | 1.281290  |
| 8                | 1                | 0              | -2.233376               | 0.866011  | -2.540323 |
| 9                | 1                | 0              | -4.663654               | 0.418468  | -2.309179 |
| 10               | 7                | 0              | -5.860050               | -0.763349 | -0.248083 |
| 11               | 8                | 0              | -6.248245               | -1.334385 | 0.757632  |

|    |    |   |           |           |           |
|----|----|---|-----------|-----------|-----------|
| 12 | 8  | 0 | -6.597932 | -0.382044 | -1.142340 |
| 13 | 6  | 0 | -1.696610 | -0.002063 | -0.624431 |
| 14 | 6  | 0 | -0.258907 | 0.342335  | -0.714061 |
| 15 | 6  | 0 | 0.752266  | -0.703476 | -0.762671 |
| 16 | 6  | 0 | -0.020844 | 1.562562  | -1.486109 |
| 17 | 8  | 0 | -0.465568 | 2.688617  | -1.198771 |
| 18 | 8  | 0 | 0.706559  | 1.385244  | -2.600215 |
| 19 | 6  | 0 | 2.204131  | -0.261420 | -0.800472 |
| 20 | 6  | 0 | 2.638906  | 0.928717  | -0.210401 |
| 21 | 6  | 0 | 3.137731  | -1.047182 | -1.488336 |
| 22 | 6  | 0 | 3.982997  | 1.295842  | -0.244655 |
| 23 | 1  | 0 | 1.950233  | 1.585354  | 0.293812  |
| 24 | 6  | 0 | 4.479612  | -0.690478 | -1.545802 |
| 25 | 6  | 0 | 4.881035  | 0.474474  | -0.906835 |
| 26 | 1  | 0 | 4.330271  | 2.207060  | 0.230703  |
| 27 | 1  | 0 | 5.207159  | -1.288736 | -2.082624 |
| 28 | 9  | 0 | 6.178011  | 0.822923  | -0.946417 |
| 29 | 7  | 0 | 0.641145  | -2.004568 | -0.731736 |
| 30 | 16 | 0 | -0.773485 | -2.937121 | -1.156846 |
| 31 | 8  | 0 | -0.021217 | -4.089062 | -1.786301 |
| 32 | 8  | 0 | -1.340393 | -3.378008 | 0.194701  |
| 33 | 1  | 0 | 2.790923  | -1.931444 | -2.012645 |
| 34 | 1  | 0 | -0.271283 | -3.618819 | 1.306755  |
| 35 | 6  | 0 | 1.074370  | 2.553071  | -3.342593 |
| 36 | 1  | 0 | 1.550304  | 2.188307  | -4.249766 |
| 37 | 1  | 0 | 1.782417  | 3.158915  | -2.763854 |
| 38 | 1  | 0 | -0.283594 | 1.287653  | 1.184505  |
| 39 | 6  | 0 | 1.015500  | -2.497386 | 2.212659  |
| 40 | 8  | 0 | 0.131836  | -1.673858 | 2.549202  |
| 41 | 8  | 0 | 2.260195  | -2.313547 | 2.199060  |
| 42 | 8  | 0 | 0.601194  | -3.744548 | 1.815274  |
| 43 | 19 | 0 | 1.780428  | 0.351554  | 2.743623  |
| 44 | 19 | 0 | 2.378618  | -4.042252 | -0.085287 |
| 45 | 1  | 0 | 0.192589  | 3.148327  | -3.580850 |
| 46 | 6  | 0 | 0.083369  | 2.799475  | 1.750084  |
| 47 | 8  | 0 | 1.320787  | 2.884023  | 1.751770  |
| 48 | 8  | 0 | -0.735297 | 3.733804  | 1.829007  |
| 49 | 8  | 0 | -0.456061 | 1.503236  | 1.622867  |
| 50 | 19 | 0 | 0.812325  | 4.884953  | -0.001703 |
| 51 | 19 | 0 | -2.749834 | 2.609205  | 0.674425  |

---

**Int16**

---

| Center<br>Number | Atomic<br>Number | Atomic<br>Type | Coordinates (Angstroms) |           |           |
|------------------|------------------|----------------|-------------------------|-----------|-----------|
|                  |                  |                | X                       | Y         | Z         |
| 1                | 6                | 0              | -3.908203               | 1.067315  | -1.512271 |
| 2                | 6                | 0              | -2.834191               | 0.304699  | -1.074426 |
| 3                | 6                | 0              | -3.839057               | 0.126944  | 1.114097  |
| 4                | 6                | 0              | -4.929645               | 0.874369  | 0.688506  |
| 5                | 6                | 0              | -4.937435               | 1.341111  | -0.620398 |
| 6                | 1                | 0              | -3.963392               | 1.436768  | -2.528844 |
| 7                | 1                | 0              | -2.007468               | 0.037074  | -1.738782 |
| 8                | 1                | 0              | -3.829657               | -0.242084 | 2.136230  |
| 9                | 1                | 0              | -5.756164               | 1.106767  | 1.353657  |
| 10               | 7                | 0              | -6.082244               | 2.135286  | -1.074329 |
| 11               | 8                | 0              | -6.070392               | 2.549489  | -2.223680 |
| 12               | 8                | 0              | -6.985016               | 2.351306  | -0.284893 |
| 13               | 6                | 0              | -2.786367               | -0.152482 | 0.248624  |
| 14               | 6                | 0              | -1.597011               | -0.997625 | 0.655168  |
| 15               | 6                | 0              | -0.227176               | -0.320867 | 0.553548  |
| 16               | 6                | 0              | -1.835727               | -1.737431 | 1.952745  |
| 17               | 8                | 0              | -2.660995               | -2.614288 | 2.065306  |
| 18               | 8                | 0              | -1.058436               | -1.325903 | 2.955579  |
| 19               | 6                | 0              | -0.148512               | 1.126509  | 0.220811  |
| 20               | 6                | 0              | -0.633379               | 2.043938  | 1.146248  |
| 21               | 6                | 0              | 0.510474                | 1.567747  | -0.928099 |
| 22               | 6                | 0              | -0.400619               | 3.404679  | 0.978241  |
| 23               | 1                | 0              | -1.167218               | 1.694392  | 2.028870  |
| 24               | 6                | 0              | 0.738279                | 2.926859  | -1.122425 |
| 25               | 6                | 0              | 0.297993                | 3.807526  | -0.148003 |
| 26               | 1                | 0              | -0.736041               | 4.140191  | 1.700688  |
| 27               | 1                | 0              | 1.253504                | 3.303144  | -1.999916 |
| 28               | 9                | 0              | 0.599726                | 5.124413  | -0.287043 |
| 29               | 7                | 0              | 0.879072                | -0.920657 | 0.739040  |
| 30               | 16               | 0              | 0.940294                | -2.621807 | 1.249463  |
| 31               | 8                | 0              | 1.752864                | -3.182924 | 0.092475  |
| 32               | 8                | 0              | 1.787673                | -2.494847 | 2.481916  |
| 33               | 1                | 0              | 0.806165                | 0.836191  | -1.672890 |
| 34               | 1                | 0              | 2.430557                | -0.075363 | 0.518658  |
| 35               | 6                | 0              | -1.111917               | -2.133341 | 4.136153  |
| 36               | 1                | 0              | -0.401385               | -1.693550 | 4.828109  |
| 37               | 1                | 0              | -0.818187               | -3.153268 | 3.886689  |
| 38               | 1                | 0              | -1.568055               | -1.596306 | 0.100450  |
| 39               | 6                | 0              | 3.386864                | 1.616580  | 0.474210  |

|    |    |   |           |           |           |
|----|----|---|-----------|-----------|-----------|
| 40 | 8  | 0 | 2.685559  | 2.031308  | 1.415038  |
| 41 | 8  | 0 | 4.255099  | 2.259890  | -0.178510 |
| 42 | 8  | 0 | 3.235573  | 0.306528  | 0.076960  |
| 43 | 19 | 0 | 3.222931  | 4.544511  | 0.771576  |
| 44 | 19 | 0 | 5.802070  | 0.278226  | -0.922265 |
| 45 | 1  | 0 | -2.118485 | -2.130924 | 4.553293  |
| 46 | 6  | 0 | -0.451348 | -2.357646 | -2.103625 |
| 47 | 8  | 0 | -0.278460 | -1.074353 | -2.248611 |
| 48 | 8  | 0 | 0.280789  | -3.181770 | -2.787398 |
| 49 | 8  | 0 | -1.301273 | -2.823023 | -1.269028 |
| 50 | 19 | 0 | 2.306518  | -1.586217 | -1.919286 |
| 51 | 19 | 0 | 0.087101  | -5.015512 | -0.927028 |

## TS11

| Center<br>Number | Atomic<br>Number | Atomic<br>Type | Coordinates (Angstroms) |           |           |
|------------------|------------------|----------------|-------------------------|-----------|-----------|
|                  |                  |                | X                       | Y         | Z         |
| 1                | 6                | 0              | -3.904990               | 1.077035  | -1.511284 |
| 2                | 6                | 0              | -2.832787               | 0.316519  | -1.073243 |
| 3                | 6                | 0              | -3.845113               | 0.128577  | 1.113872  |
| 4                | 6                | 0              | -4.929375               | 0.882892  | 0.688009  |
| 5                | 6                | 0              | -4.939389               | 1.351413  | -0.620321 |
| 6                | 1                | 0              | -3.958460               | 1.447968  | -2.527417 |
| 7                | 1                | 0              | -2.014623               | 0.053004  | -1.741425 |
| 8                | 1                | 0              | -3.832973               | -0.237432 | 2.135485  |
| 9                | 1                | 0              | -5.751792               | 1.115851  | 1.352477  |
| 10               | 7                | 0              | -6.073247               | 2.148117  | -1.074511 |
| 11               | 8                | 0              | -6.063425               | 2.564746  | -2.222971 |
| 12               | 8                | 0              | -6.981525               | 2.363954  | -0.286177 |
| 13               | 6                | 0              | -2.778324               | -0.160639 | 0.249290  |
| 14               | 6                | 0              | -1.595586               | -0.981231 | 0.665295  |
| 15               | 6                | 0              | -0.247086               | -0.334685 | 0.552001  |
| 16               | 6                | 0              | -1.837308               | -1.736460 | 1.934079  |
| 17               | 8                | 0              | -2.671079               | -2.609797 | 2.062959  |
| 18               | 8                | 0              | -1.062251               | -1.331071 | 2.955726  |
| 19               | 6                | 0              | -0.146900               | 1.121918  | 0.220625  |
| 20               | 6                | 0              | -0.629665               | 2.043981  | 1.151454  |
| 21               | 6                | 0              | 0.512766                | 1.567133  | -0.923643 |
| 22               | 6                | 0              | -0.393899               | 3.404405  | 0.984675  |
| 23               | 1                | 0              | -1.164301               | 1.690194  | 2.029207  |
| 24               | 6                | 0              | 0.743559                | 2.925952  | -1.116749 |
| 25               | 6                | 0              | 0.305442                | 3.806555  | -0.141313 |

|    |    |   |           |           |           |
|----|----|---|-----------|-----------|-----------|
| 26 | 1  | 0 | -0.727606 | 4.140034  | 1.707770  |
| 27 | 1  | 0 | 1.259446  | 3.301985  | -1.993949 |
| 28 | 9  | 0 | 0.610540  | 5.123008  | -0.278969 |
| 29 | 7  | 0 | 0.880572  | -0.923135 | 0.742640  |
| 30 | 16 | 0 | 0.934937  | -2.620712 | 1.247749  |
| 31 | 8  | 0 | 1.747365  | -3.183915 | 0.084931  |
| 32 | 8  | 0 | 1.781786  | -2.503885 | 2.481050  |
| 33 | 1  | 0 | 0.810903  | 0.839915  | -1.669133 |
| 34 | 1  | 0 | 2.420567  | -0.084631 | 0.517546  |
| 35 | 6  | 0 | -1.118762 | -2.141343 | 4.129698  |
| 36 | 1  | 0 | -0.403944 | -1.708183 | 4.825917  |
| 37 | 1  | 0 | -0.832437 | -3.167110 | 3.886027  |
| 38 | 1  | 0 | -1.504145 | -1.863548 | -0.247707 |
| 39 | 6  | 0 | 3.389560  | 1.609318  | 0.478227  |
| 40 | 8  | 0 | 2.689371  | 2.025231  | 1.419372  |
| 41 | 8  | 0 | 4.258763  | 2.251112  | -0.174351 |
| 42 | 8  | 0 | 3.235635  | 0.299589  | 0.080429  |
| 43 | 19 | 0 | 3.234002  | 4.537724  | 0.774443  |
| 44 | 19 | 0 | 5.804718  | 0.275343  | -0.927667 |
| 45 | 1  | 0 | -2.124498 | -2.133514 | 4.553268  |
| 46 | 6  | 0 | -0.437398 | -2.336971 | -2.117558 |
| 47 | 8  | 0 | -0.280019 | -1.076528 | -2.248408 |
| 48 | 8  | 0 | 0.261243  | -3.180565 | -2.778633 |
| 49 | 8  | 0 | -1.311008 | -2.796175 | -1.237859 |
| 50 | 19 | 0 | 2.303783  | -1.587930 | -1.921935 |
| 51 | 19 | 0 | 0.078098  | -5.014234 | -0.926182 |

---

### Int17

---

| Center<br>Number | Atomic<br>Number | Atomic<br>Type | Coordinates (Angstroms) |           |           |
|------------------|------------------|----------------|-------------------------|-----------|-----------|
|                  |                  |                | X                       | Y         | Z         |
| 1                | 6                | 0              | -3.908015               | 1.072239  | -1.508011 |
| 2                | 6                | 0              | -2.834606               | 0.319879  | -1.070836 |
| 3                | 6                | 0              | -3.850139               | 0.119746  | 1.118129  |
| 4                | 6                | 0              | -4.928620               | 0.879922  | 0.693209  |
| 5                | 6                | 0              | -4.948029               | 1.346956  | -0.615589 |
| 6                | 1                | 0              | -3.963289               | 1.441966  | -2.524480 |
| 7                | 1                | 0              | -2.031481               | 0.063024  | -1.747134 |
| 8                | 1                | 0              | -3.829144               | -0.238015 | 2.140176  |
| 9                | 1                | 0              | -5.743074               | 1.113058  | 1.358798  |
| 10               | 7                | 0              | -6.069201               | 2.142440  | -1.068816 |
| 11               | 8                | 0              | -6.068950               | 2.556880  | -2.218082 |

|    |    |   |           |           |           |
|----|----|---|-----------|-----------|-----------|
| 12 | 8  | 0 | -6.982867 | 2.359267  | -0.278903 |
| 13 | 6  | 0 | -2.763674 | -0.183646 | 0.252087  |
| 14 | 6  | 0 | -1.586483 | -0.961143 | 0.680895  |
| 15 | 6  | 0 | -0.273524 | -0.354796 | 0.544281  |
| 16 | 6  | 0 | -1.825417 | -1.735466 | 1.909427  |
| 17 | 8  | 0 | -2.663059 | -2.611455 | 2.068197  |
| 18 | 8  | 0 | -1.058697 | -1.324977 | 2.957983  |
| 19 | 6  | 0 | -0.147452 | 1.115537  | 0.211801  |
| 20 | 6  | 0 | -0.630886 | 2.044789  | 1.149161  |
| 21 | 6  | 0 | 0.511473  | 1.567811  | -0.925828 |
| 22 | 6  | 0 | -0.396748 | 3.405316  | 0.981332  |
| 23 | 1  | 0 | -1.164691 | 1.684129  | 2.020463  |
| 24 | 6  | 0 | 0.740642  | 2.926719  | -1.119975 |
| 25 | 6  | 0 | 0.301762  | 3.807651  | -0.145158 |
| 26 | 1  | 0 | -0.731038 | 4.141033  | 1.704092  |
| 27 | 1  | 0 | 1.255855  | 3.302638  | -1.997630 |
| 28 | 9  | 0 | 0.604841  | 5.124243  | -0.284064 |
| 29 | 7  | 0 | 0.889693  | -0.921346 | 0.740608  |
| 30 | 16 | 0 | 0.937840  | -2.611162 | 1.250647  |
| 31 | 8  | 0 | 1.749250  | -3.184404 | 0.081655  |
| 32 | 8  | 0 | 1.785932  | -2.496871 | 2.482724  |
| 33 | 1  | 0 | 0.817533  | 0.847589  | -1.670916 |
| 34 | 1  | 0 | 2.407468  | -0.089148 | 0.508179  |
| 35 | 6  | 0 | -1.112488 | -2.132607 | 4.126912  |
| 36 | 1  | 0 | -0.401154 | -1.693724 | 4.830123  |
| 37 | 1  | 0 | -0.819971 | -3.164296 | 3.900093  |
| 38 | 1  | 0 | -1.398128 | -2.284316 | -0.782525 |
| 39 | 6  | 0 | 3.388577  | 1.613265  | 0.475128  |
| 40 | 8  | 0 | 2.688164  | 2.028545  | 1.416376  |
| 41 | 8  | 0 | 4.257192  | 2.255782  | -0.177868 |
| 42 | 8  | 0 | 3.235694  | 0.303459  | 0.077673  |
| 43 | 19 | 0 | 3.227924  | 4.541307  | 0.773189  |
| 44 | 19 | 0 | 5.801686  | 0.272618  | -0.922774 |
| 45 | 1  | 0 | -2.118852 | -2.129200 | 4.556029  |
| 46 | 6  | 0 | -0.409094 | -2.310328 | -2.136237 |
| 47 | 8  | 0 | -0.280926 | -1.084662 | -2.246524 |
| 48 | 8  | 0 | 0.241322  | -3.181043 | -2.763011 |
| 49 | 8  | 0 | -1.316584 | -2.763438 | -1.186320 |
| 50 | 19 | 0 | 2.303665  | -1.587867 | -1.918531 |
| 51 | 19 | 0 | 0.081044  | -5.014991 | -0.925946 |

---

**TS12**

---

| Center<br>Number | Atomic<br>Number | Atomic<br>Type | Coordinates (Angstroms) |           |           |
|------------------|------------------|----------------|-------------------------|-----------|-----------|
|                  |                  |                | X                       | Y         | Z         |
| 1                | 6                | 0              | -4.026002               | 0.984460  | -1.275553 |
| 2                | 6                | 0              | -2.860905               | 0.456380  | -0.748219 |
| 3                | 6                | 0              | -3.980616               | 0.064362  | 1.359262  |
| 4                | 6                | 0              | -5.152481               | 0.581697  | 0.837363  |
| 5                | 6                | 0              | -5.165822               | 1.046480  | -0.477153 |
| 6                | 1                | 0              | -4.075281               | 1.324736  | -2.304018 |
| 7                | 1                | 0              | -1.989287               | 0.349171  | -1.385442 |
| 8                | 1                | 0              | -3.973054               | -0.295107 | 2.378608  |
| 9                | 1                | 0              | -6.053868               | 0.645151  | 1.437938  |
| 10               | 7                | 0              | -6.390555               | 1.592680  | -1.024432 |
| 11               | 8                | 0              | -6.376387               | 2.015669  | -2.174312 |
| 12               | 8                | 0              | -7.387133               | 1.612838  | -0.314348 |
| 13               | 6                | 0              | -2.795060               | -0.001217 | 0.591043  |
| 14               | 6                | 0              | -1.549371               | -0.529167 | 1.147002  |
| 15               | 6                | 0              | -0.281104               | -0.057130 | 0.702546  |
| 16               | 6                | 0              | -1.660468               | -1.488972 | 2.242764  |
| 17               | 8                | 0              | -2.578573               | -2.273033 | 2.427327  |
| 18               | 8                | 0              | -0.642222               | -1.387756 | 3.130693  |
| 19               | 6                | 0              | -0.153671               | 1.357089  | 0.221345  |
| 20               | 6                | 0              | -0.661777               | 2.379836  | 1.025880  |
| 21               | 6                | 0              | 0.559459                | 1.680620  | -0.933637 |
| 22               | 6                | 0              | -0.423033               | 3.713289  | 0.717450  |
| 23               | 1                | 0              | -1.227093               | 2.123040  | 1.917418  |
| 24               | 6                | 0              | 0.798180                | 3.011024  | -1.265747 |
| 25               | 6                | 0              | 0.315087                | 3.995939  | -0.420620 |
| 26               | 1                | 0              | -0.786340               | 4.521142  | 1.341899  |
| 27               | 1                | 0              | 1.350544                | 3.287063  | -2.158003 |
| 28               | 9                | 0              | 0.610245                | 5.286989  | -0.701594 |
| 29               | 7                | 0              | 0.860820                | -0.715633 | 0.749881  |
| 30               | 16               | 0              | 0.997950                | -2.450147 | 1.120234  |
| 31               | 8                | 0              | 1.682061                | -2.913287 | -0.162419 |
| 32               | 8                | 0              | 1.977489                | -2.446854 | 2.255527  |
| 33               | 1                | 0              | 0.898171                | 0.886310  | -1.584344 |
| 34               | 1                | 0              | 1.876913                | -0.235941 | 0.467917  |
| 35               | 6                | 0              | -0.573154               | -2.422959 | 4.105067  |
| 36               | 1                | 0              | 0.349763                | -2.251534 | 4.654385  |
| 37               | 1                | 0              | -0.540687               | -3.400961 | 3.617568  |
| 38               | 1                | 0              | -1.567454               | -1.980328 | -0.687585 |
| 39               | 6                | 0              | 3.346932                | 1.409796  | 0.433227  |



|    |    |   |           |           |           |
|----|----|---|-----------|-----------|-----------|
| 40 | 8  | 0 | 2.675007  | 1.861155  | 1.406143  |
| 41 | 8  | 0 | 4.281976  | 2.087171  | -0.141396 |
| 42 | 8  | 0 | 3.099106  | 0.189426  | -0.028068 |
| 43 | 19 | 0 | 3.255002  | 4.315148  | 0.798154  |
| 44 | 19 | 0 | 5.720735  | -0.016243 | -0.646609 |
| 45 | 1  | 0 | -1.437600 | -2.383410 | 4.773706  |
| 46 | 6  | 0 | -0.421586 | -2.174464 | -2.216814 |
| 47 | 8  | 0 | -0.296475 | -0.930566 | -2.240457 |
| 48 | 8  | 0 | 0.171650  | -3.025569 | -2.912682 |
| 49 | 8  | 0 | -1.299614 | -2.703651 | -1.281709 |
| 50 | 19 | 0 | 2.369729  | -1.346025 | -2.124872 |
| 51 | 19 | 0 | 0.237758  | -4.944245 | -1.086842 |

### Int18

| Center<br>Number | Atomic<br>Number | Atomic<br>Type | Coordinates (Angstroms) |           |           |
|------------------|------------------|----------------|-------------------------|-----------|-----------|
|                  |                  |                | X                       | Y         | Z         |
| 1                | 6                | 0              | -2.984723               | 0.072351  | -1.418716 |
| 2                | 6                | 0              | -1.819834               | -0.017985 | -0.685508 |
| 3                | 6                | 0              | -2.319356               | -2.328621 | -0.158192 |
| 4                | 6                | 0              | -3.486635               | -2.245444 | -0.887713 |
| 5                | 6                | 0              | -3.827213               | -1.041195 | -1.516662 |
| 6                | 1                | 0              | -3.242250               | 0.989160  | -1.936199 |
| 7                | 1                | 0              | -1.148507               | 0.833766  | -0.665393 |
| 8                | 1                | 0              | -2.074979               | -3.264910 | 0.325905  |
| 9                | 1                | 0              | -4.149036               | -3.099382 | -0.967871 |
| 10               | 7                | 0              | -5.036618               | -0.953850 | -2.277623 |
| 11               | 8                | 0              | -5.329454               | 0.119151  | -2.807410 |
| 12               | 8                | 0              | -5.748199               | -1.954352 | -2.380408 |
| 13               | 6                | 0              | -1.442910               | -1.213927 | -0.004233 |
| 14               | 6                | 0              | -0.240945               | -1.275768 | 0.793427  |
| 15               | 6                | 0              | 0.355768                | -0.068203 | 1.371142  |
| 16               | 6                | 0              | 0.298096                | -2.575806 | 1.154516  |
| 17               | 8                | 0              | 0.169945                | -3.625249 | 0.527792  |
| 18               | 8                | 0              | 0.970663                | -2.564388 | 2.332404  |
| 19               | 6                | 0              | -0.568381               | 1.027257  | 1.821089  |
| 20               | 6                | 0              | -1.736700               | 0.717124  | 2.523704  |
| 21               | 6                | 0              | -0.241977               | 2.365646  | 1.587401  |
| 22               | 6                | 0              | -2.563718               | 1.726442  | 3.012587  |
| 23               | 1                | 0              | -1.997085               | -0.323841 | 2.693171  |
| 24               | 6                | 0              | -1.063632               | 3.389219  | 2.052215  |
| 25               | 6                | 0              | -2.203007               | 3.041472  | 2.762577  |

|    |    |   |           |           |           |
|----|----|---|-----------|-----------|-----------|
| 26 | 1  | 0 | -3.466943 | 1.508168  | 3.571545  |
| 27 | 1  | 0 | -0.837967 | 4.434709  | 1.871193  |
| 28 | 9  | 0 | -3.003845 | 4.031825  | 3.227297  |
| 29 | 7  | 0 | 1.609080  | 0.178388  | 1.606149  |
| 30 | 16 | 0 | 2.881685  | -0.880005 | 1.014086  |
| 31 | 8  | 0 | 3.644189  | 0.114641  | 0.138877  |
| 32 | 8  | 0 | 3.656758  | -1.138692 | 2.289970  |
| 33 | 1  | 0 | 0.647712  | 2.589358  | 1.008658  |
| 34 | 6  | 0 | 1.717046  | -3.738365 | 2.638446  |
| 35 | 1  | 0 | 2.261500  | -3.512221 | 3.553249  |
| 36 | 1  | 0 | 2.421380  | -3.961482 | 1.832258  |
| 37 | 1  | 0 | 0.766362  | -0.681167 | -1.150861 |
| 38 | 1  | 0 | 1.051940  | -4.591998 | 2.786893  |
| 39 | 6  | 0 | 1.543725  | 0.841431  | -2.051599 |
| 40 | 8  | 0 | 0.860385  | 1.612781  | -1.347227 |
| 41 | 8  | 0 | 2.423074  | 1.144543  | -2.898244 |
| 42 | 8  | 0 | 1.339971  | -0.516729 | -1.921262 |
| 43 | 19 | 0 | 2.286130  | 3.741779  | -2.202316 |
| 44 | 19 | 0 | 4.052819  | -0.914157 | -2.275185 |
| 45 | 1  | 0 | 1.855972  | 0.989476  | 2.136414  |

---

### TS13

| Center<br>Number | Atomic<br>Number | Atomic<br>Type | Coordinates (Angstroms) |           |           |
|------------------|------------------|----------------|-------------------------|-----------|-----------|
|                  |                  |                | X                       | Y         | Z         |
| 1                | 6                | 0              | -1.240135               | 1.344482  | -1.062335 |
| 2                | 6                | 0              | -0.922335               | 0.038615  | -0.862654 |
| 3                | 6                | 0              | 0.079484                | 0.635881  | 1.293195  |
| 4                | 6                | 0              | -0.233207               | 1.941536  | 1.059741  |
| 5                | 6                | 0              | -0.844891               | 2.349918  | -0.146105 |
| 6                | 1                | 0              | -1.813928               | 1.632669  | -1.936255 |
| 7                | 1                | 0              | -1.256503               | -0.698825 | -1.576431 |
| 8                | 1                | 0              | 0.508489                | 0.380328  | 2.249146  |
| 9                | 1                | 0              | -0.018676               | 2.689598  | 1.814941  |
| 10               | 7                | 0              | -1.188124               | 3.677289  | -0.360777 |
| 11               | 8                | 0              | -1.747110               | 3.998947  | -1.425216 |
| 12               | 8                | 0              | -0.939012               | 4.527089  | 0.517222  |
| 13               | 6                | 0              | -0.163486               | -0.429814 | 0.310872  |
| 14               | 6                | 0              | -4.426625               | -1.740098 | -0.610937 |
| 15               | 6                | 0              | -3.966849               | -0.909252 | 0.325962  |
| 16               | 6                | 0              | -4.182450               | -3.140527 | -0.671718 |
| 17               | 8                | 0              | -4.730861               | -4.037229 | -0.026826 |

|    |    |   |           |           |           |
|----|----|---|-----------|-----------|-----------|
| 18 | 8  | 0 | -3.359382 | -3.469749 | -1.729624 |
| 19 | 6  | 0 | -4.369658 | 0.531058  | 0.364972  |
| 20 | 6  | 0 | -5.518779 | 0.945462  | -0.327839 |
| 21 | 6  | 0 | -3.631699 | 1.511310  | 1.038142  |
| 22 | 6  | 0 | -5.911730 | 2.276096  | -0.357815 |
| 23 | 1  | 0 | -6.087281 | 0.186881  | -0.855333 |
| 24 | 6  | 0 | -3.998234 | 2.857145  | 1.009533  |
| 25 | 6  | 0 | -5.136199 | 3.215128  | 0.311538  |
| 26 | 1  | 0 | -6.800256 | 2.597630  | -0.890581 |
| 27 | 1  | 0 | -3.388767 | 3.619436  | 1.485428  |
| 28 | 9  | 0 | -5.506934 | 4.513267  | 0.273549  |
| 29 | 7  | 0 | -3.096983 | -1.281918 | 1.439348  |
| 30 | 16 | 0 | -1.516148 | -1.847778 | 1.310714  |
| 31 | 8  | 0 | -1.110621 | -1.979859 | 2.734304  |
| 32 | 8  | 0 | -1.555253 | -3.094776 | 0.516015  |
| 33 | 1  | 0 | -2.714815 | 1.240372  | 1.551505  |
| 34 | 1  | 0 | -3.139572 | -0.657048 | 2.240117  |
| 35 | 6  | 0 | -2.968008 | -4.828411 | -1.775351 |
| 36 | 1  | 0 | -3.831822 | -5.495200 | -1.842330 |
| 37 | 1  | 0 | -2.350107 | -4.939548 | -2.668634 |
| 38 | 1  | 0 | -2.385959 | -5.089183 | -0.885708 |
| 39 | 6  | 0 | 1.862409  | 1.990529  | -2.102733 |
| 40 | 6  | 0 | 2.172554  | 0.634389  | -2.118419 |
| 41 | 6  | 0 | 4.453327  | 1.151958  | -1.399127 |
| 42 | 6  | 0 | 4.147401  | 2.507132  | -1.393514 |
| 43 | 6  | 0 | 2.853780  | 2.886485  | -1.730157 |
| 44 | 1  | 0 | 0.872265  | 2.347543  | -2.355916 |
| 45 | 1  | 0 | 1.424623  | -0.099774 | -2.405247 |
| 46 | 1  | 0 | 5.445352  | 0.802565  | -1.133639 |
| 47 | 1  | 0 | 4.883157  | 3.254373  | -1.126531 |
| 48 | 7  | 0 | 2.511291  | 4.318745  | -1.681571 |
| 49 | 8  | 0 | 1.350839  | 4.629326  | -1.874118 |
| 50 | 8  | 0 | 3.408933  | 5.107465  | -1.445251 |
| 51 | 6  | 0 | 3.457274  | 0.241498  | -1.747797 |
| 52 | 6  | 0 | 0.954870  | -1.421923 | -0.000662 |
| 53 | 6  | 0 | 2.188494  | -1.390267 | 0.573689  |
| 54 | 6  | 0 | 0.709806  | -2.429490 | -1.101283 |
| 55 | 8  | 0 | 0.154452  | -2.226230 | -2.158981 |
| 56 | 8  | 0 | 1.183941  | -3.627735 | -0.753120 |
| 57 | 6  | 0 | 2.543423  | -0.832853 | 1.902712  |
| 58 | 6  | 0 | 3.525598  | 0.155713  | 2.033722  |
| 59 | 6  | 0 | 1.950034  | -1.376440 | 3.047527  |
| 60 | 6  | 0 | 3.881146  | 0.635744  | 3.287383  |
| 61 | 1  | 0 | 3.994742  | 0.575934  | 1.149393  |

|    |    |   |          |           |           |
|----|----|---|----------|-----------|-----------|
| 62 | 6  | 0 | 2.308237 | -0.915590 | 4.309469  |
| 63 | 6  | 0 | 3.262928 | 0.086235  | 4.402403  |
| 64 | 1  | 0 | 4.621957 | 1.416533  | 3.412686  |
| 65 | 1  | 0 | 1.862235 | -1.318325 | 5.211394  |
| 66 | 9  | 0 | 3.608499 | 0.538852  | 5.616746  |
| 67 | 7  | 0 | 3.330254 | -1.925997 | -0.074214 |
| 68 | 16 | 0 | 3.823709 | -1.497122 | -1.621936 |
| 69 | 8  | 0 | 5.266755 | -1.691060 | -1.600372 |
| 70 | 8  | 0 | 3.008189 | -2.188546 | -2.604392 |
| 71 | 1  | 0 | 1.178743 | -2.131746 | 2.942898  |
| 72 | 1  | 0 | 4.149940 | -2.032990 | 0.518081  |
| 73 | 6  | 0 | 1.078746 | -4.633412 | -1.760956 |
| 74 | 1  | 0 | 1.606183 | -4.311498 | -2.660729 |
| 75 | 1  | 0 | 1.541117 | -5.523935 | -1.339595 |
| 76 | 1  | 0 | 0.030431 | -4.823863 | -1.997119 |

### Int19

| Center<br>Number | Atomic<br>Number | Atomic<br>Type | Coordinates (Angstroms) |           |           |
|------------------|------------------|----------------|-------------------------|-----------|-----------|
|                  |                  |                | X                       | Y         | Z         |
| 1                | 6                | 0              | -1.622608               | 0.941789  | -1.592206 |
| 2                | 6                | 0              | -0.985113               | -0.159560 | -1.031278 |
| 3                | 6                | 0              | 0.716605                | 1.290669  | -0.125024 |
| 4                | 6                | 0              | 0.079506                | 2.396773  | -0.649517 |
| 5                | 6                | 0              | -1.090607               | 2.201202  | -1.382636 |
| 6                | 1                | 0              | -2.559439               | 0.801720  | -2.119295 |
| 7                | 1                | 0              | -1.430660               | -1.135720 | -1.163489 |
| 8                | 1                | 0              | 1.660839                | 1.438776  | 0.384209  |
| 9                | 1                | 0              | 0.485558                | 3.393456  | -0.529159 |
| 10               | 7                | 0              | -1.791645               | 3.364477  | -1.916555 |
| 11               | 8                | 0              | -2.706550               | 3.181323  | -2.704591 |
| 12               | 8                | 0              | -1.433235               | 4.471884  | -1.541094 |
| 13               | 6                | 0              | 0.184085                | -0.010409 | -0.277783 |
| 14               | 6                | 0              | -4.288911               | -0.767685 | -1.051318 |
| 15               | 6                | 0              | -3.971518               | -0.469504 | 0.217548  |
| 16               | 6                | 0              | -4.359511               | -2.139347 | -1.462224 |
| 17               | 8                | 0              | -5.327584               | -2.895742 | -1.542398 |
| 18               | 8                | 0              | -3.118062               | -2.583948 | -1.884651 |
| 19               | 6                | 0              | -3.696592               | 0.944483  | 0.621045  |
| 20               | 6                | 0              | -4.288683               | 2.012930  | -0.062930 |
| 21               | 6                | 0              | -2.744797               | 1.245130  | 1.612500  |
| 22               | 6                | 0              | -3.939603               | 3.333420  | 0.201740  |

|    |    |   |           |           |           |
|----|----|---|-----------|-----------|-----------|
| 23 | 1  | 0 | -5.011054 | 1.787048  | -0.840567 |
| 24 | 6  | 0 | -2.371607 | 2.559947  | 1.879740  |
| 25 | 6  | 0 | -2.975364 | 3.584196  | 1.165674  |
| 26 | 1  | 0 | -4.389354 | 4.162387  | -0.335326 |
| 27 | 1  | 0 | -1.605882 | 2.795766  | 2.612012  |
| 28 | 9  | 0 | -2.617268 | 4.863882  | 1.417123  |
| 29 | 7  | 0 | -3.762066 | -1.456693 | 1.254042  |
| 30 | 16 | 0 | -2.225858 | -2.336763 | 1.255632  |
| 31 | 8  | 0 | -1.677778 | -1.911958 | 2.616956  |
| 32 | 8  | 0 | -2.687910 | -3.775434 | 1.312733  |
| 33 | 1  | 0 | -2.258960 | 0.434383  | 2.153051  |
| 34 | 1  | 0 | -3.815996 | -1.036377 | 2.182330  |
| 35 | 6  | 0 | -3.012003 | -3.964599 | -2.178847 |
| 36 | 1  | 0 | -3.696947 | -4.255590 | -2.978999 |
| 37 | 1  | 0 | -1.975397 | -4.129415 | -2.478124 |
| 38 | 1  | 0 | -3.229199 | -4.566550 | -1.288736 |
| 39 | 6  | 0 | 2.563481  | 0.600144  | -2.715218 |
| 40 | 6  | 0 | 2.786847  | -0.641153 | -2.134965 |
| 41 | 6  | 0 | 4.593639  | 0.304666  | -0.786823 |
| 42 | 6  | 0 | 4.389217  | 1.543291  | -1.387036 |
| 43 | 6  | 0 | 3.359997  | 1.661586  | -2.313456 |
| 44 | 1  | 0 | 1.767412  | 0.751713  | -3.435469 |
| 45 | 1  | 0 | 2.163203  | -1.490230 | -2.395176 |
| 46 | 1  | 0 | 5.372029  | 0.168268  | -0.042690 |
| 47 | 1  | 0 | 4.991407  | 2.404915  | -1.129635 |
| 48 | 7  | 0 | 3.061139  | 2.995330  | -2.859262 |
| 49 | 8  | 0 | 2.006868  | 3.137212  | -3.451125 |
| 50 | 8  | 0 | 3.875814  | 3.881088  | -2.672843 |
| 51 | 6  | 0 | 3.771685  | -0.756556 | -1.156614 |
| 52 | 6  | 0 | 0.933540  | -1.199672 | 0.206338  |
| 53 | 6  | 0 | 1.901742  | -1.140496 | 1.171151  |
| 54 | 6  | 0 | 0.637911  | -2.504084 | -0.474321 |
| 55 | 8  | 0 | 0.301982  | -2.633689 | -1.634903 |
| 56 | 8  | 0 | 0.698774  | -3.522584 | 0.383417  |
| 57 | 6  | 0 | 1.933231  | -0.139783 | 2.260640  |
| 58 | 6  | 0 | 3.086294  | 0.604976  | 2.536857  |
| 59 | 6  | 0 | 0.773655  | 0.050890  | 3.028608  |
| 60 | 6  | 0 | 3.069518  | 1.588908  | 3.518629  |
| 61 | 1  | 0 | 3.991672  | 0.446570  | 1.957719  |
| 62 | 6  | 0 | 0.753703  | 1.024866  | 4.018720  |
| 63 | 6  | 0 | 1.894988  | 1.787385  | 4.229692  |
| 64 | 1  | 0 | 3.939320  | 2.198039  | 3.734359  |
| 65 | 1  | 0 | -0.118180 | 1.187953  | 4.642585  |
| 66 | 9  | 0 | 1.870657  | 2.737123  | 5.176093  |

|    |    |   |           |           |           |
|----|----|---|-----------|-----------|-----------|
| 67 | 7  | 0 | 3.006902  | -2.000729 | 1.135858  |
| 68 | 16 | 0 | 3.891381  | -2.298991 | -0.265697 |
| 69 | 8  | 0 | 5.252078  | -2.511839 | 0.205752  |
| 70 | 8  | 0 | 3.232868  | -3.312532 | -1.072629 |
| 71 | 1  | 0 | -0.069548 | -0.631662 | 2.885346  |
| 72 | 1  | 0 | 3.598346  | -2.038656 | 1.961666  |
| 73 | 6  | 0 | 0.340770  | -4.798483 | -0.149305 |
| 74 | 1  | 0 | 0.924037  | -4.996325 | -1.050491 |
| 75 | 1  | 0 | 0.590381  | -5.520401 | 0.627613  |
| 76 | 1  | 0 | -0.731868 | -4.829504 | -0.371511 |

---

## Int20

---

| Center<br>Number | Atomic<br>Number | Atomic<br>Type | Coordinates (Angstroms) |           |           |
|------------------|------------------|----------------|-------------------------|-----------|-----------|
|                  |                  |                | X                       | Y         | Z         |
| 1                | 6                | 0              | 4.939078                | -2.158460 | 1.302552  |
| 2                | 6                | 0              | 4.191954                | -2.097055 | 0.142660  |
| 3                | 6                | 0              | 3.117094                | -0.089380 | 0.926811  |
| 4                | 6                | 0              | 3.852543                | -0.136444 | 2.103851  |
| 5                | 6                | 0              | 4.762609                | -1.176990 | 2.268706  |
| 6                | 1                | 0              | 5.663106                | -2.956546 | 1.464314  |
| 7                | 1                | 0              | 4.313078                | -2.861393 | -0.615513 |
| 8                | 1                | 0              | 2.398829                | 0.714321  | 0.786222  |
| 9                | 1                | 0              | 3.717714                | 0.605045  | 2.880448  |
| 10               | 7                | 0              | 5.553823                | -1.237657 | 3.496832  |
| 11               | 8                | 0              | 6.335689                | -2.157319 | 3.624747  |
| 12               | 8                | 0              | 5.384918                | -0.364259 | 4.332082  |
| 13               | 6                | 0              | 3.276604                | -1.051962 | -0.073083 |
| 14               | 6                | 0              | -3.360448               | -0.976379 | -1.165823 |
| 15               | 6                | 0              | -4.185971               | -0.329851 | -0.326185 |
| 16               | 6                | 0              | -3.206290               | -2.374018 | -1.211753 |
| 17               | 8                | 0              | -3.646327               | -3.173211 | -2.080083 |
| 18               | 8                | 0              | -2.265269               | -2.881898 | -0.293481 |
| 19               | 6                | 0              | -4.168027               | 1.172799  | -0.219547 |
| 20               | 6                | 0              | -3.779270               | 1.982329  | -1.307393 |
| 21               | 6                | 0              | -4.522967               | 1.829371  | 0.976369  |
| 22               | 6                | 0              | -3.787968               | 3.371367  | -1.230378 |
| 23               | 1                | 0              | -3.461370               | 1.474709  | -2.218913 |
| 24               | 6                | 0              | -4.525770               | 3.227506  | 1.074364  |
| 25               | 6                | 0              | -4.168045               | 3.972951  | -0.035148 |
| 26               | 1                | 0              | -3.510805               | 3.995419  | -2.072160 |
| 27               | 1                | 0              | -4.804404               | 3.734979  | 1.988362  |

|    |    |   |           |           |           |
|----|----|---|-----------|-----------|-----------|
| 28 | 9  | 0 | -4.208691 | 5.329181  | 0.038893  |
| 29 | 7  | 0 | -5.162359 | -0.954019 | 0.586291  |
| 30 | 16 | 0 | -4.499795 | -1.701438 | 2.018675  |
| 31 | 8  | 0 | -5.290163 | -0.935840 | 3.079758  |
| 32 | 8  | 0 | -4.983867 | -3.132409 | 1.937249  |
| 33 | 1  | 0 | -4.797419 | 1.242771  | 1.842826  |
| 34 | 1  | 0 | -5.849631 | -0.290926 | 0.950156  |
| 35 | 6  | 0 | -1.955112 | -4.257626 | -0.452451 |
| 36 | 1  | 0 | -1.551365 | -4.463713 | -1.449278 |
| 37 | 1  | 0 | -1.201292 | -4.496673 | 0.309609  |
| 38 | 1  | 0 | -2.839227 | -4.892036 | -0.317279 |
| 39 | 6  | 0 | -0.115706 | -0.363593 | 1.675188  |
| 40 | 6  | 0 | -0.172291 | -0.741821 | 0.322417  |
| 41 | 6  | 0 | -0.756236 | 1.551681  | -0.296759 |
| 42 | 6  | 0 | -0.721058 | 1.935981  | 1.052365  |
| 43 | 6  | 0 | -0.343760 | 0.970409  | 1.956795  |
| 44 | 1  | 0 | 0.088660  | -1.081971 | 2.478344  |
| 45 | 1  | 0 | -0.065848 | -1.783331 | 0.023518  |
| 46 | 1  | 0 | -1.082468 | 2.251504  | -1.064006 |
| 47 | 1  | 0 | -0.992929 | 2.942698  | 1.393007  |
| 48 | 7  | 0 | -0.184759 | 1.400487  | 3.386888  |
| 49 | 8  | 0 | 0.246140  | 0.583200  | 4.163224  |
| 50 | 8  | 0 | -0.471281 | 2.543274  | 3.650769  |
| 51 | 6  | 0 | -0.327874 | 0.282148  | -0.623277 |
| 52 | 6  | 0 | 2.464734  | -1.006407 | -1.311926 |
| 53 | 6  | 0 | 2.137119  | 0.146995  | -1.951639 |
| 54 | 6  | 0 | 1.992071  | -2.347062 | -1.804651 |
| 55 | 8  | 0 | 1.679215  | -3.270189 | -1.066535 |
| 56 | 8  | 0 | 2.046717  | -2.452012 | -3.125349 |
| 57 | 6  | 0 | 2.878910  | 1.420361  | -1.760711 |
| 58 | 6  | 0 | 2.213739  | 2.643264  | -1.677331 |
| 59 | 6  | 0 | 4.280756  | 1.399635  | -1.728494 |
| 60 | 6  | 0 | 2.925912  | 3.833775  | -1.513674 |
| 61 | 1  | 0 | 1.129909  | 2.692518  | -1.723916 |
| 62 | 6  | 0 | 5.005474  | 2.569111  | -1.581300 |
| 63 | 6  | 0 | 4.310049  | 3.761572  | -1.471359 |
| 64 | 1  | 0 | 2.425274  | 4.785285  | -1.428755 |
| 65 | 1  | 0 | 6.089084  | 2.576357  | -1.565387 |
| 66 | 9  | 0 | 5.005334  | 4.904786  | -1.338713 |
| 67 | 7  | 0 | 1.039597  | 0.240225  | -2.805022 |
| 68 | 16 | 0 | -0.563319 | -0.262644 | -2.335575 |
| 69 | 8  | 0 | -1.352959 | 0.634516  | -3.161760 |
| 70 | 8  | 0 | -0.578599 | -1.705070 | -2.469751 |
| 71 | 1  | 0 | 4.803135  | 0.449359  | -1.827775 |

|    |   |   |          |           |           |
|----|---|---|----------|-----------|-----------|
| 72 | 1 | 0 | 0.975972 | 1.074804  | -3.384613 |
| 73 | 6 | 0 | 1.522163 | -3.661046 | -3.664586 |
| 74 | 1 | 0 | 0.475585 | -3.773511 | -3.382054 |
| 75 | 1 | 0 | 1.619506 | -3.572143 | -4.743749 |
| 76 | 1 | 0 | 2.095018 | -4.520391 | -3.304166 |

---

## TS14

---

| Center<br>Number | Atomic<br>Number | Atomic<br>Type | Coordinates (Angstroms) |           |           |
|------------------|------------------|----------------|-------------------------|-----------|-----------|
|                  |                  |                | X                       | Y         | Z         |
| 1                | 6                | 0              | 5.040413                | -2.069082 | 1.271247  |
| 2                | 6                | 0              | 4.238973                | -2.061768 | 0.139885  |
| 3                | 6                | 0              | 3.151653                | -0.044821 | 0.906019  |
| 4                | 6                | 0              | 3.939615                | -0.039373 | 2.045998  |
| 5                | 6                | 0              | 4.876997                | -1.053622 | 2.206277  |
| 6                | 1                | 0              | 5.780334                | -2.841923 | 1.435172  |
| 7                | 1                | 0              | 4.350933                | -2.854685 | -0.591530 |
| 8                | 1                | 0              | 2.400880                | 0.726527  | 0.773411  |
| 9                | 1                | 0              | 3.821282                | 0.719289  | 2.809305  |
| 10               | 7                | 0              | 5.711369                | -1.059988 | 3.406713  |
| 11               | 8                | 0              | 6.518915                | -1.965452 | 3.540197  |
| 12               | 8                | 0              | 5.560766                | -0.158571 | 4.215341  |
| 13               | 6                | 0              | 3.291625                | -1.046803 | -0.069797 |
| 14               | 6                | 0              | -2.994631               | -0.886883 | -0.678349 |
| 15               | 6                | 0              | -4.017533               | -0.221718 | -0.116964 |
| 16               | 6                | 0              | -3.005593               | -2.332811 | -0.858125 |
| 17               | 8                | 0              | -3.648953               | -2.933009 | -1.706351 |
| 18               | 8                | 0              | -2.138435               | -2.993342 | -0.050150 |
| 19               | 6                | 0              | -4.098317               | 1.262048  | -0.097320 |
| 20               | 6                | 0              | -3.808692               | 2.010406  | -1.242351 |
| 21               | 6                | 0              | -4.488285               | 1.930468  | 1.071270  |
| 22               | 6                | 0              | -3.886214               | 3.400336  | -1.225843 |
| 23               | 1                | 0              | -3.502515               | 1.485706  | -2.143235 |
| 24               | 6                | 0              | -4.556801               | 3.319006  | 1.109779  |
| 25               | 6                | 0              | -4.254121               | 4.026865  | -0.044937 |
| 26               | 1                | 0              | -3.669631               | 3.997839  | -2.104578 |
| 27               | 1                | 0              | -4.840380               | 3.855270  | 2.008437  |
| 28               | 9                | 0              | -4.330083               | 5.371919  | -0.019158 |
| 29               | 7                | 0              | -5.073070               | -0.891906 | 0.544398  |
| 30               | 16               | 0              | -4.615376               | -1.780551 | 2.036364  |
| 31               | 8                | 0              | -5.497826               | -1.048203 | 3.023148  |
| 32               | 8                | 0              | -5.125201               | -3.169686 | 1.777991  |



|    |    |   |           |           |           |
|----|----|---|-----------|-----------|-----------|
| 33 | 1  | 0 | -4.724801 | 1.346992  | 1.958692  |
| 34 | 1  | 0 | -5.828003 | -0.261540 | 0.811777  |
| 35 | 6  | 0 | -1.947896 | -4.366332 | -0.366873 |
| 36 | 1  | 0 | -1.620099 | -4.475909 | -1.403745 |
| 37 | 1  | 0 | -1.175758 | -4.728252 | 0.311642  |
| 38 | 1  | 0 | -2.871880 | -4.931498 | -0.222516 |
| 39 | 6  | 0 | 0.039218  | -0.275326 | 1.647244  |
| 40 | 6  | 0 | -0.264479 | -0.803165 | 0.422074  |
| 41 | 6  | 0 | -0.952928 | 1.421391  | -0.348756 |
| 42 | 6  | 0 | -0.642279 | 1.940891  | 0.883896  |
| 43 | 6  | 0 | -0.176970 | 1.094782  | 1.902067  |
| 44 | 1  | 0 | 0.488518  | -0.891257 | 2.416743  |
| 45 | 1  | 0 | -0.076176 | -1.846445 | 0.204565  |
| 46 | 1  | 0 | -1.284489 | 2.074229  | -1.146493 |
| 47 | 1  | 0 | -0.720165 | 3.005684  | 1.069626  |
| 48 | 7  | 0 | 0.201078  | 1.645668  | 3.154261  |
| 49 | 8  | 0 | 0.725514  | 0.909456  | 3.994948  |
| 50 | 8  | 0 | -0.002147 | 2.844200  | 3.366242  |
| 51 | 6  | 0 | -0.911929 | 0.009200  | -0.567504 |
| 52 | 6  | 0 | 2.416965  | -1.065389 | -1.262207 |
| 53 | 6  | 0 | 2.003888  | 0.076250  | -1.886901 |
| 54 | 6  | 0 | 1.967594  | -2.424534 | -1.696224 |
| 55 | 8  | 0 | 1.728507  | -3.338563 | -0.934999 |
| 56 | 8  | 0 | 1.973146  | -2.555887 | -3.024967 |
| 57 | 6  | 0 | 2.748164  | 1.359170  | -1.803177 |
| 58 | 6  | 0 | 2.078656  | 2.585954  | -1.722121 |
| 59 | 6  | 0 | 4.148969  | 1.348897  | -1.867448 |
| 60 | 6  | 0 | 2.787344  | 3.780864  | -1.674045 |
| 61 | 1  | 0 | 0.995759  | 2.608015  | -1.663213 |
| 62 | 6  | 0 | 4.870024  | 2.532819  | -1.824892 |
| 63 | 6  | 0 | 4.171675  | 3.729273  | -1.723889 |
| 64 | 1  | 0 | 2.286136  | 4.738415  | -1.596708 |
| 65 | 1  | 0 | 5.952119  | 2.544955  | -1.880248 |
| 66 | 9  | 0 | 4.863185  | 4.876690  | -1.682737 |
| 67 | 7  | 0 | 0.866844  | 0.124345  | -2.688794 |
| 68 | 16 | 0 | -0.685720 | -0.471676 | -2.274668 |
| 69 | 8  | 0 | -1.526879 | 0.307301  | -3.177356 |
| 70 | 8  | 0 | -0.657715 | -1.923586 | -2.371006 |
| 71 | 1  | 0 | 4.671425  | 0.402558  | -1.961442 |
| 72 | 1  | 0 | 0.767613  | 0.947203  | -3.275350 |
| 73 | 6  | 0 | 1.484797  | -3.807865 | -3.510878 |
| 74 | 1  | 0 | 0.451642  | -3.946754 | -3.188914 |
| 75 | 1  | 0 | 1.543880  | -3.747787 | -4.595742 |
| 76 | 1  | 0 | 2.102505  | -4.627378 | -3.139003 |

---

**Int21**

---

| Center<br>Number | Atomic<br>Number | Atomic<br>Type | Coordinates (Angstroms) |           |           |
|------------------|------------------|----------------|-------------------------|-----------|-----------|
|                  |                  |                | X                       | Y         | Z         |
| 1                | 6                | 0              | 3.065613                | -0.227161 | -0.155875 |
| 2                | 6                | 0              | 1.691960                | -0.115261 | -0.005719 |
| 3                | 6                | 0              | 1.374762                | -0.588566 | -2.352274 |
| 4                | 6                | 0              | 2.746424                | -0.706846 | -2.523354 |
| 5                | 6                | 0              | 3.570346                | -0.518968 | -1.418893 |
| 6                | 1                | 0              | 3.740302                | -0.105668 | 0.682473  |
| 7                | 1                | 0              | 1.258232                | 0.091514  | 0.968617  |
| 8                | 1                | 0              | 0.715748                | -0.731013 | -3.202364 |
| 9                | 1                | 0              | 3.180478                | -0.932996 | -3.489009 |
| 10               | 7                | 0              | 5.016220                | -0.643655 | -1.588163 |
| 11               | 8                | 0              | 5.726312                | -0.480069 | -0.608302 |
| 12               | 8                | 0              | 5.445740                | -0.905752 | -2.700269 |
| 13               | 6                | 0              | 0.825868                | -0.278842 | -1.099224 |
| 14               | 6                | 0              | -0.642736               | -0.180508 | -0.908973 |
| 15               | 6                | 0              | -1.208508               | 0.837742  | -0.167625 |
| 16               | 6                | 0              | -1.383702               | -1.372518 | -1.334787 |
| 17               | 8                | 0              | -0.868558               | -2.459993 | -1.578192 |
| 18               | 8                | 0              | -2.701456               | -1.189218 | -1.441422 |
| 19               | 6                | 0              | -0.389776               | 2.043155  | 0.172784  |
| 20               | 6                | 0              | 0.244868                | 2.761686  | -0.845604 |
| 21               | 6                | 0              | -0.311627               | 2.505203  | 1.491011  |
| 22               | 6                | 0              | 0.958356                | 3.920273  | -0.558725 |
| 23               | 1                | 0              | 0.172205                | 2.411175  | -1.870467 |
| 24               | 6                | 0              | 0.408288                | 3.655978  | 1.794527  |
| 25               | 6                | 0              | 1.029214                | 4.341294  | 0.760778  |
| 26               | 1                | 0              | 1.450306                | 4.495692  | -1.334386 |
| 27               | 1                | 0              | 0.495304                | 4.023839  | 2.810629  |
| 28               | 9                | 0              | 1.722990                | 5.456529  | 1.047976  |
| 29               | 7                | 0              | -2.497415               | 0.842821  | 0.302955  |
| 30               | 16               | 0              | -3.995334               | 1.217947  | -0.973522 |
| 31               | 8                | 0              | -4.594581               | 2.301883  | -0.149029 |
| 32               | 8                | 0              | -3.261711               | 1.726664  | -2.157005 |
| 33               | 1                | 0              | -0.782376               | 1.924678  | 2.277736  |
| 34               | 6                | 0              | -3.488909               | -2.325128 | -1.788707 |
| 35               | 1                | 0              | -4.492127               | -1.939837 | -1.962090 |
| 36               | 1                | 0              | -3.509640               | -3.043983 | -0.965950 |
| 37               | 1                | 0              | -3.097683               | -2.806638 | -2.685596 |

38            1            0            -2.631140    1.668883    0.885911

---

### CP1

---

| Center<br>Number | Atomic<br>Number | Atomic<br>Type | Coordinates (Angstroms) |           |           |
|------------------|------------------|----------------|-------------------------|-----------|-----------|
|                  |                  |                | X                       | Y         | Z         |
| 1                | 6                | 0              | 1.191042                | -0.199464 | -1.049908 |
| 2                | 6                | 0              | -0.149985               | -0.530176 | -0.921600 |
| 3                | 6                | 0              | 0.459039                | -2.636491 | 0.143915  |
| 4                | 6                | 0              | 1.805863                | -2.331616 | -0.013637 |
| 5                | 6                | 0              | 2.133052                | -1.106024 | -0.580878 |
| 6                | 1                | 0              | 1.491670                | 0.745558  | -1.484896 |
| 7                | 1                | 0              | -0.920003               | 0.166588  | -1.230611 |
| 8                | 1                | 0              | 0.147433                | -3.561661 | 0.614943  |
| 9                | 1                | 0              | 2.586589                | -3.003576 | 0.320458  |
| 10               | 7                | 0              | 3.547269                | -0.725049 | -0.638552 |
| 11               | 8                | 0              | 3.805306                | 0.472342  | -0.654242 |
| 12               | 8                | 0              | 4.381623                | -1.606308 | -0.650834 |
| 13               | 6                | 0              | -0.495572               | -1.724075 | -0.298168 |
| 14               | 7                | 0              | -2.588938               | -1.068037 | 1.349559  |
| 15               | 16               | 0              | -2.222265               | -2.006547 | 0.070332  |
| 16               | 8                | 0              | -2.348374               | -3.408242 | 0.464854  |
| 17               | 8                | 0              | -2.984095               | -1.508244 | -1.071610 |
| 18               | 1                | 0              | -1.817079               | -1.054528 | 1.985209  |
| 19               | 6                | 0              | 0.103809                | 3.412925  | 0.335278  |
| 20               | 8                | 0              | -1.159826               | 3.196878  | 0.073532  |
| 21               | 8                | 0              | 0.750269                | 4.248287  | -0.417853 |
| 22               | 8                | 0              | 0.681454                | 2.790994  | 1.286279  |
| 23               | 19               | 0              | -1.338996               | 4.993671  | -1.776502 |
| 24               | 19               | 0              | 3.023636                | 3.788774  | 0.742917  |
| 25               | 1                | 0              | -2.779376               | -0.137548 | 1.036633  |

---

### CP2

---

| Center<br>Number | Atomic<br>Number | Atomic<br>Type | Coordinates (Angstroms) |           |           |
|------------------|------------------|----------------|-------------------------|-----------|-----------|
|                  |                  |                | X                       | Y         | Z         |
| 1                | 6                | 0              | 1.110215                | -0.429723 | -1.191997 |
| 2                | 6                | 0              | -0.259025               | -0.616345 | -1.068473 |
| 3                | 6                | 0              | 0.117580                | -2.575825 | 0.318190  |
| 4                | 6                | 0              | 1.490698                | -2.424022 | 0.174501  |

|    |    |   |           |           |           |
|----|----|---|-----------|-----------|-----------|
| 5  | 6  | 0 | 1.951786  | -1.333538 | -0.552761 |
| 6  | 1  | 0 | 1.521387  | 0.388197  | -1.771930 |
| 7  | 1  | 0 | -0.956424 | 0.056801  | -1.553399 |
| 8  | 1  | 0 | -0.290992 | -3.394414 | 0.900409  |
| 9  | 1  | 0 | 2.193879  | -3.109111 | 0.632171  |
| 10 | 7  | 0 | 3.394493  | -1.110056 | -0.625037 |
| 11 | 8  | 0 | 3.778400  | 0.039740  | -0.816703 |
| 12 | 8  | 0 | 4.136785  | -2.059189 | -0.477630 |
| 13 | 6  | 0 | -0.743973 | -1.662050 | -0.285638 |
| 14 | 7  | 0 | -2.730834 | -0.779771 | 1.338825  |
| 15 | 16 | 0 | -2.503749 | -1.721984 | 0.092892  |
| 16 | 8  | 0 | -2.777645 | -3.147217 | 0.360777  |
| 17 | 8  | 0 | -3.160206 | -1.132168 | -1.086507 |
| 18 | 1  | 0 | -2.409304 | -1.273360 | 2.171854  |
| 19 | 1  | 0 | -2.061933 | 0.642339  | 1.074335  |
| 20 | 6  | 0 | -0.368132 | 1.703097  | 0.915600  |
| 21 | 8  | 0 | -1.705636 | 1.560872  | 0.713383  |
| 22 | 8  | 0 | 0.167512  | 2.642127  | 0.251574  |
| 23 | 8  | 0 | 0.214691  | 0.925791  | 1.702445  |
| 24 | 19 | 0 | -1.938242 | 3.408854  | -1.146215 |
| 25 | 19 | 0 | 2.590435  | 1.899614  | 0.989823  |

### Int3<sup>a</sup>

| Center<br>Number | Atomic<br>Number | Atomic<br>Type | Coordinates (Angstroms) |           |           |
|------------------|------------------|----------------|-------------------------|-----------|-----------|
|                  |                  |                | X                       | Y         | Z         |
| 1                | 6                | 0              | 0.845618                | -2.206900 | -1.063564 |
| 2                | 6                | 0              | -0.278784               | -1.654590 | -0.460138 |
| 3                | 6                | 0              | 0.906917                | -1.594779 | 1.676448  |
| 4                | 6                | 0              | 2.028010                | -2.155747 | 1.077452  |
| 5                | 6                | 0              | 1.968345                | -2.442012 | -0.280391 |
| 6                | 1                | 0              | 0.857949                | -2.456317 | -2.116627 |
| 7                | 1                | 0              | 2.926952                | -2.369220 | 1.640648  |
| 8                | 6                | 0              | -0.223426               | -1.352337 | 0.900149  |
| 9                | 6                | 0              | -1.855013               | 1.323274  | -1.144782 |
| 10               | 6                | 0              | -1.133714               | 1.490455  | -0.038408 |
| 11               | 6                | 0              | -3.152108               | 0.733504  | -1.205665 |
| 12               | 8                | 0              | -4.236166               | 1.257144  | -0.958957 |
| 13               | 8                | 0              | -3.111136               | -0.521841 | -1.776047 |
| 14               | 7                | 0              | -1.533003               | 1.031241  | 1.302591  |
| 15               | 16               | 0              | -1.636109               | -0.573182 | 1.662681  |
| 16               | 8                | 0              | -1.487770               | -0.672733 | 3.114635  |

|    |    |   |           |           |           |
|----|----|---|-----------|-----------|-----------|
| 17 | 8  | 0 | -2.816790 | -1.141805 | 1.027067  |
| 18 | 1  | 0 | -1.103901 | 1.520307  | 2.084672  |
| 19 | 6  | 0 | -4.347694 | -1.218533 | -1.769353 |
| 20 | 1  | 0 | -5.103511 | -0.688630 | -2.354107 |
| 21 | 1  | 0 | -4.149837 | -2.193716 | -2.215228 |
| 22 | 1  | 0 | -4.711518 | -1.343805 | -0.746311 |
| 23 | 6  | 0 | 0.217432  | 2.217448  | -0.170639 |
| 24 | 1  | 0 | 0.741982  | 1.842748  | -1.024657 |
| 25 | 1  | 0 | 0.801558  | 2.047461  | 0.709589  |
| 26 | 6  | 0 | -0.027087 | 3.728384  | -0.340592 |
| 27 | 1  | 0 | -0.388794 | 3.922223  | -1.328769 |
| 28 | 1  | 0 | -0.752289 | 4.055057  | 0.375136  |
| 29 | 6  | 0 | 1.292731  | 4.490171  | -0.118422 |
| 30 | 1  | 0 | 2.035779  | 4.120869  | -0.793993 |
| 31 | 1  | 0 | 1.622987  | 4.345222  | 0.888962  |
| 32 | 6  | 0 | 1.067795  | 5.992097  | -0.373813 |
| 33 | 1  | 0 | 0.738168  | 6.137106  | -1.381393 |
| 34 | 1  | 0 | 0.324276  | 6.361253  | 0.301318  |
| 35 | 6  | 0 | 2.387389  | 6.754006  | -0.150726 |
| 36 | 1  | 0 | 3.130209  | 6.386559  | -0.827558 |
| 37 | 1  | 0 | 2.230509  | 7.797871  | -0.325755 |
| 38 | 1  | 0 | 2.718309  | 6.606967  | 0.856136  |
| 39 | 17 | 0 | -1.744623 | -1.332111 | -1.379336 |
| 40 | 17 | 0 | 0.898369  | -1.205311 | 3.392794  |
| 41 | 17 | 0 | 3.389955  | -3.139228 | -1.048841 |

---

### Int3<sup>b</sup>

| Center<br>Number | Atomic<br>Number | Atomic<br>Type | Coordinates (Angstroms) |           |           |
|------------------|------------------|----------------|-------------------------|-----------|-----------|
|                  |                  |                | X                       | Y         | Z         |
| 1                | 6                | 0              | 0.845618                | -2.206900 | -1.063564 |
| 2                | 6                | 0              | -0.278784               | -1.654590 | -0.460138 |
| 3                | 6                | 0              | 0.906917                | -1.594779 | 1.676448  |
| 4                | 6                | 0              | 2.028010                | -2.155747 | 1.077452  |
| 5                | 6                | 0              | 1.968345                | -2.442012 | -0.280391 |
| 6                | 1                | 0              | 0.857949                | -2.456317 | -2.116627 |
| 7                | 1                | 0              | 2.926952                | -2.369220 | 1.640648  |
| 8                | 6                | 0              | -0.223426               | -1.352337 | 0.900149  |
| 9                | 6                | 0              | -1.855013               | 1.323274  | -1.144782 |
| 10               | 6                | 0              | -1.133714               | 1.490455  | -0.038408 |
| 11               | 6                | 0              | -3.152108               | 0.733504  | -1.205665 |
| 12               | 8                | 0              | -4.236166               | 1.257144  | -0.958957 |

|    |    |   |           |           |           |
|----|----|---|-----------|-----------|-----------|
| 13 | 8  | 0 | -3.111136 | -0.521841 | -1.776047 |
| 14 | 7  | 0 | -1.533003 | 1.031241  | 1.302591  |
| 15 | 16 | 0 | -1.636109 | -0.573182 | 1.662681  |
| 16 | 8  | 0 | -1.487770 | -0.672733 | 3.114635  |
| 17 | 8  | 0 | -2.816790 | -1.141805 | 1.027067  |
| 18 | 1  | 0 | -1.103901 | 1.520307  | 2.084672  |
| 19 | 6  | 0 | -4.347694 | -1.218533 | -1.769353 |
| 20 | 1  | 0 | -5.103511 | -0.688630 | -2.354107 |
| 21 | 1  | 0 | -4.149837 | -2.193716 | -2.215228 |
| 22 | 1  | 0 | -4.711518 | -1.343805 | -0.746311 |
| 23 | 6  | 0 | 0.217432  | 2.217448  | -0.170639 |
| 24 | 1  | 0 | 0.741982  | 1.842748  | -1.024657 |
| 25 | 1  | 0 | 0.801558  | 2.047461  | 0.709589  |
| 26 | 6  | 0 | -0.027087 | 3.728384  | -0.340592 |
| 27 | 1  | 0 | -0.388794 | 3.922223  | -1.328769 |
| 28 | 1  | 0 | -0.752289 | 4.055057  | 0.375136  |
| 29 | 6  | 0 | 1.292731  | 4.490171  | -0.118422 |
| 30 | 1  | 0 | 2.035779  | 4.120869  | -0.793993 |
| 31 | 1  | 0 | 1.622987  | 4.345222  | 0.888962  |
| 32 | 6  | 0 | 1.067795  | 5.992097  | -0.373813 |
| 33 | 1  | 0 | 0.738168  | 6.137106  | -1.381393 |
| 34 | 1  | 0 | 0.324276  | 6.361253  | 0.301318  |
| 35 | 6  | 0 | 2.387389  | 6.754006  | -0.150726 |
| 36 | 1  | 0 | 3.130209  | 6.386559  | -0.827558 |
| 37 | 1  | 0 | 2.230509  | 7.797871  | -0.325755 |
| 38 | 1  | 0 | 2.718309  | 6.606967  | 0.856136  |
| 39 | 1  | 0 | -1.166567 | -1.465728 | -1.026770 |
| 40 | 1  | 0 | 0.911996  | -1.352667 | 2.718684  |
| 41 | 6  | 0 | 3.212254  | -3.052076 | -0.952784 |
| 42 | 7  | 0 | 4.138400  | -3.506297 | -1.453412 |

---

### Int3<sup>c</sup>

---

| Center<br>Number | Atomic<br>Number | Atomic<br>Type | Coordinates (Angstroms) |           |           |
|------------------|------------------|----------------|-------------------------|-----------|-----------|
|                  |                  |                | X                       | Y         | Z         |
| 1                | 6                | 0              | -1.627523               | -1.993356 | 0.856046  |
| 2                | 6                | 0              | -0.592757               | -1.240646 | 0.513463  |
| 3                | 6                | 0              | -2.736035               | -2.371739 | 0.052637  |
| 4                | 8                | 0              | -2.802399               | -3.271800 | -0.786025 |
| 5                | 8                | 0              | -3.897684               | -1.724597 | 0.442921  |
| 6                | 7                | 0              | -0.433596               | -0.550338 | -0.795051 |
| 7                | 16               | 0              | -1.495442               | 0.625107  | -1.248694 |

|    |   |   |           |           |           |
|----|---|---|-----------|-----------|-----------|
| 8  | 8 | 0 | -0.803438 | 1.435933  | -2.251641 |
| 9  | 8 | 0 | -2.778915 | 0.023883  | -1.585407 |
| 10 | 6 | 0 | -5.022155 | -1.974754 | -0.382616 |
| 11 | 1 | 0 | -5.290700 | -3.034209 | -0.379747 |
| 12 | 1 | 0 | -5.841602 | -1.384545 | 0.029768  |
| 13 | 1 | 0 | -4.823211 | -1.663689 | -1.411851 |
| 14 | 6 | 0 | 0.599999  | -0.948961 | 1.400229  |
| 15 | 1 | 0 | 0.377517  | -1.361354 | 2.388309  |
| 16 | 1 | 0 | 0.725265  | 0.139577  | 1.519403  |
| 17 | 6 | 0 | 1.920904  | -1.547953 | 0.899291  |
| 18 | 1 | 0 | 1.795214  | -2.632487 | 0.787912  |
| 19 | 1 | 0 | 2.169435  | -1.165370 | -0.101187 |
| 20 | 6 | 0 | 3.093120  | -1.258771 | 1.833894  |
| 21 | 1 | 0 | 2.862504  | -1.649475 | 2.834508  |
| 22 | 1 | 0 | 3.207936  | -0.171906 | 1.947643  |
| 23 | 6 | 0 | 4.411814  | -1.857583 | 1.349339  |
| 24 | 1 | 0 | 4.292841  | -2.941995 | 1.232646  |
| 25 | 1 | 0 | 4.640358  | -1.463821 | 0.350970  |
| 26 | 6 | 0 | 5.572727  | -1.565425 | 2.296377  |
| 27 | 1 | 0 | 5.375065  | -1.975537 | 3.291821  |
| 28 | 1 | 0 | 6.507990  | -1.999793 | 1.933688  |
| 29 | 1 | 0 | 5.723073  | -0.486735 | 2.406288  |
| 30 | 6 | 0 | -1.765484 | 1.648279  | 0.189488  |
| 31 | 6 | 0 | -2.701412 | 1.263280  | 1.142090  |
| 32 | 6 | 0 | -0.998274 | 2.791990  | 0.368549  |
| 33 | 6 | 0 | -2.822312 | 2.076716  | 2.267785  |
| 34 | 1 | 0 | -3.300349 | 0.366842  | 1.009098  |
| 35 | 6 | 0 | -1.215137 | 3.528156  | 1.530928  |
| 36 | 1 | 0 | -0.270822 | 3.102324  | -0.372729 |
| 37 | 7 | 0 | -2.102952 | 3.184720  | 2.468379  |
| 38 | 1 | 0 | -3.536362 | 1.819442  | 3.045819  |
| 39 | 1 | 0 | -0.647046 | 4.436792  | 1.711654  |
| 40 | 6 | 0 | 0.919439  | -0.028426 | -1.035472 |
| 41 | 6 | 0 | 1.701397  | -0.562891 | -2.059855 |
| 42 | 6 | 0 | 1.421512  | 1.001166  | -0.239600 |
| 43 | 6 | 0 | 2.985381  | -0.068275 | -2.287808 |
| 44 | 1 | 0 | 1.305574  | -1.375119 | -2.686633 |
| 45 | 6 | 0 | 2.705495  | 1.496718  | -0.468127 |
| 46 | 1 | 0 | 0.805275  | 1.422645  | 0.567702  |
| 47 | 6 | 0 | 3.487502  | 0.962107  | -1.491940 |
| 48 | 1 | 0 | 3.602024  | -0.489923 | -3.094815 |
| 49 | 1 | 0 | 3.100938  | 2.308791  | 0.159278  |
| 50 | 6 | 0 | 4.905248  | 1.508077  | -1.743956 |
| 51 | 1 | 0 | 5.557061  | 0.700820  | -2.005442 |

|    |   |   |          |          |           |
|----|---|---|----------|----------|-----------|
| 52 | 1 | 0 | 4.877180 | 2.217477 | -2.544496 |
| 53 | 1 | 0 | 5.266560 | 1.985277 | -0.857033 |

---

### Int4<sup>a</sup>

| Center<br>Number | Atomic<br>Number | Atomic<br>Type | Coordinates (Angstroms) |           |           |
|------------------|------------------|----------------|-------------------------|-----------|-----------|
|                  |                  |                | X                       | Y         | Z         |
| 1                | 6                | 0              | -3.620250               | 0.582652  | 0.337949  |
| 2                | 6                | 0              | -2.495634               | 0.102451  | 1.025922  |
| 3                | 6                | 0              | -1.935511               | -1.285324 | -0.847375 |
| 4                | 6                | 0              | -3.046289               | -0.811476 | -1.559758 |
| 5                | 6                | 0              | -3.900944               | 0.068761  | -0.918566 |
| 6                | 1                | 0              | -4.261457               | 1.337836  | 0.777652  |
| 7                | 1                | 0              | -3.215475               | -1.126047 | -2.586435 |
| 8                | 6                | 0              | -1.743918               | -0.964436 | 0.494040  |
| 9                | 6                | 0              | 0.727489                | 0.976386  | 0.294695  |
| 10               | 6                | 0              | 1.417869                | -0.110424 | -0.072294 |
| 11               | 6                | 0              | 0.610948                | 2.230867  | -0.289026 |
| 12               | 8                | 0              | -0.137104               | 2.572430  | -1.229214 |
| 13               | 8                | 0              | 1.304427                | 3.218144  | 0.430772  |
| 14               | 6                | 0              | 1.020831                | 4.542517  | 0.028835  |
| 15               | 1                | 0              | 1.273070                | 4.713256  | -1.027679 |
| 16               | 1                | 0              | -0.036109               | 4.804945  | 0.160881  |
| 17               | 1                | 0              | 1.641538                | 5.192457  | 0.660281  |
| 18               | 7                | 0              | 1.141682                | -1.420020 | 0.585076  |
| 19               | 16               | 0              | -0.278008               | -1.655385 | 1.370043  |
| 20               | 8                | 0              | -0.558223               | -3.098763 | 1.269214  |
| 21               | 8                | 0              | -0.233471               | -1.083678 | 2.706054  |
| 22               | 1                | 0              | 1.283920                | -2.227649 | -0.020494 |
| 23               | 6                | 0              | 2.649616                | -0.264885 | -0.960520 |
| 24               | 1                | 0              | 2.643628                | 0.555841  | -1.690543 |
| 25               | 1                | 0              | 2.658859                | -1.217403 | -1.527905 |
| 26               | 6                | 0              | 3.920717                | -0.176352 | -0.103860 |
| 27               | 1                | 0              | 3.866229                | 0.762666  | 0.475387  |
| 28               | 1                | 0              | 3.918798                | -0.995824 | 0.628334  |
| 29               | 6                | 0              | 5.208791                | -0.207403 | -0.907883 |
| 30               | 1                | 0              | 5.219267                | 0.615210  | -1.630964 |
| 31               | 1                | 0              | 5.248441                | -1.131005 | -1.502806 |
| 32               | 6                | 0              | 6.467620                | -0.122778 | -0.029463 |
| 33               | 1                | 0              | 6.415210                | 0.791262  | 0.571752  |
| 34               | 1                | 0              | 6.463144                | -0.962863 | 0.674187  |
| 35               | 6                | 0              | 7.749665                | -0.137213 | -0.853027 |



|    |    |   |           |           |           |
|----|----|---|-----------|-----------|-----------|
| 36 | 1  | 0 | 7.783108  | 0.708098  | -1.545760 |
| 37 | 1  | 0 | 8.636912  | -0.074458 | -0.210085 |
| 38 | 1  | 0 | 7.824126  | -1.056901 | -1.439407 |
| 39 | 17 | 0 | -2.181558 | 0.924841  | 2.512994  |
| 40 | 17 | 0 | -0.834346 | -2.271900 | -1.751137 |
| 41 | 17 | 0 | -5.340444 | 0.577750  | -1.725106 |

---

**Int4<sup>b</sup>**

---

| Center<br>Number | Atomic<br>Number | Atomic<br>Type | Coordinates (Angstroms) |           |           |
|------------------|------------------|----------------|-------------------------|-----------|-----------|
|                  |                  |                | X                       | Y         | Z         |
| 1                | 6                | 0              | -4.008637               | 0.090085  | 0.722339  |
| 2                | 6                | 0              | -2.890639               | -0.660011 | 1.132585  |
| 3                | 6                | 0              | -2.242486               | -0.973660 | -1.185878 |
| 4                | 6                | 0              | -3.355909               | -0.223941 | -1.610648 |
| 5                | 6                | 0              | -4.227204               | 0.243860  | -0.636850 |
| 6                | 1                | 0              | -4.702771               | 0.534741  | 1.447628  |
| 7                | 1                | 0              | -2.648487               | -0.803904 | 2.175934  |
| 8                | 1                | 0              | -1.528439               | -1.356355 | -1.912306 |
| 9                | 1                | 0              | -3.540863               | -0.006238 | -2.666889 |
| 10               | 6                | 0              | -2.126984               | -1.273760 | 0.166677  |
| 11               | 6                | 0              | 0.317249                | 0.680056  | 0.410322  |
| 12               | 6                | 0              | 1.033710                | -0.209107 | -0.271805 |
| 13               | 6                | 0              | 0.148426                | 2.023178  | 0.340887  |
| 14               | 8                | 0              | -0.631558               | 2.691075  | -0.375140 |
| 15               | 8                | 0              | 0.835063                | 2.672455  | 1.381042  |
| 16               | 6                | 0              | 0.571383                | 4.056703  | 1.497215  |
| 17               | 1                | 0              | 0.833137                | 4.599170  | 0.579253  |
| 18               | 1                | 0              | -0.480491               | 4.255313  | 1.718140  |
| 19               | 1                | 0              | 1.202176                | 4.422370  | 2.313482  |
| 20               | 7                | 0              | 0.765921                | -1.673373 | -0.091236 |
| 21               | 16               | 0              | -0.600722               | -2.123893 | 0.699806  |
| 22               | 8                | 0              | -0.886001               | -3.483124 | 0.196239  |
| 23               | 8                | 0              | -0.465907               | -1.949071 | 2.144946  |
| 24               | 1                | 0              | 0.852270                | -2.241288 | -0.929229 |
| 25               | 6                | 0              | 2.295128                | -0.024445 | -1.100327 |
| 26               | 1                | 0              | 2.291946                | 1.016313  | -1.479692 |
| 27               | 1                | 0              | 2.374521                | -0.692184 | -1.982084 |
| 28               | 6                | 0              | 3.536919                | -0.220592 | -0.218266 |
| 29               | 1                | 0              | 3.443620                | 0.419481  | 0.676053  |
| 30               | 1                | 0              | 3.562904                | -1.255425 | 0.153126  |
| 31               | 6                | 0              | 4.840810                | 0.093332  | -0.947350 |
| 32               | 1                | 0              | 4.835319                | 1.137528  | -1.266789 |

|    |   |   |           |           |           |
|----|---|---|-----------|-----------|-----------|
| 33 | 1 | 0 | 4.905683  | -0.507996 | -1.862836 |
| 34 | 6 | 0 | 6.093460  | -0.163624 | -0.100658 |
| 35 | 1 | 0 | 6.035735  | 0.437587  | 0.812763  |
| 36 | 1 | 0 | 6.106020  | -1.206428 | 0.217875  |
| 37 | 6 | 0 | 7.380356  | 0.163443  | -0.860440 |
| 38 | 1 | 0 | 7.397962  | 1.217713  | -1.164374 |
| 39 | 1 | 0 | 8.263507  | -0.023335 | -0.251712 |
| 40 | 1 | 0 | 7.448503  | -0.436403 | -1.773543 |
| 41 | 6 | 0 | -5.449869 | 0.904468  | -1.068021 |
| 42 | 7 | 0 | -6.431314 | 1.391235  | -1.409775 |

---

### Int4<sup>c</sup>

---

| Center<br>Number | Atomic<br>Number | Atomic<br>Type | Coordinates (Angstroms) |           |           |
|------------------|------------------|----------------|-------------------------|-----------|-----------|
|                  |                  |                | X                       | Y         | Z         |
| 1                | 6                | 0              | 0.517283                | -1.312670 | 1.072523  |
| 2                | 6                | 0              | 0.812706                | -0.110929 | 0.594915  |
| 3                | 6                | 0              | 1.408143                | -1.986957 | 1.963165  |
| 4                | 8                | 0              | 1.411117                | -1.963689 | 3.194316  |
| 5                | 8                | 0              | 2.260049                | -2.845117 | 1.298785  |
| 6                | 6                | 0              | 3.077316                | -3.648134 | 2.137325  |
| 7                | 1                | 0              | 3.731009                | -3.034020 | 2.762803  |
| 8                | 1                | 0              | 2.472565                | -4.281042 | 2.792472  |
| 9                | 1                | 0              | 3.678336                | -4.269542 | 1.473042  |
| 10               | 7                | 0              | -0.106011               | 0.586727  | -0.338671 |
| 11               | 16               | 0              | -0.546341               | -0.193008 | -1.724604 |
| 12               | 8                | 0              | -1.219260               | 0.785534  | -2.578416 |
| 13               | 8                | 0              | 0.615640                | -0.904280 | -2.242651 |
| 14               | 6                | 0              | 2.038666                | 0.748612  | 0.820533  |
| 15               | 1                | 0              | 2.540536                | 0.412986  | 1.736078  |
| 16               | 1                | 0              | 1.734337                | 1.793244  | 0.986501  |
| 17               | 6                | 0              | 3.020293                | 0.699927  | -0.353741 |
| 18               | 1                | 0              | 3.364412                | -0.335435 | -0.477265 |
| 19               | 1                | 0              | 2.484931                | 0.958402  | -1.276371 |
| 20               | 6                | 0              | 4.221025                | 1.625024  | -0.174043 |
| 21               | 1                | 0              | 4.743025                | 1.370550  | 0.759179  |
| 22               | 1                | 0              | 3.869596                | 2.659640  | -0.055598 |
| 23               | 6                | 0              | 5.209348                | 1.559520  | -1.336639 |
| 24               | 1                | 0              | 5.557648                | 0.525643  | -1.453847 |
| 25               | 1                | 0              | 4.686463                | 1.814897  | -2.266910 |
| 26               | 6                | 0              | 6.406157                | 2.487788  | -1.146445 |
| 27               | 1                | 0              | 6.956691                | 2.230548  | -0.235892 |

|    |   |   |           |           |           |
|----|---|---|-----------|-----------|-----------|
| 28 | 1 | 0 | 7.101785  | 2.427865  | -1.987688 |
| 29 | 1 | 0 | 6.080136  | 3.528660  | -1.053258 |
| 30 | 6 | 0 | -1.795528 | -1.408906 | -1.321600 |
| 31 | 6 | 0 | -1.439106 | -2.728877 | -1.078525 |
| 32 | 6 | 0 | -3.124727 | -1.015145 | -1.246580 |
| 33 | 6 | 0 | -2.464863 | -3.620581 | -0.780317 |
| 34 | 1 | 0 | -0.402950 | -3.039857 | -1.113951 |
| 35 | 6 | 0 | -4.064708 | -1.992909 | -0.922038 |
| 36 | 1 | 0 | -3.420796 | 0.008284  | -1.446709 |
| 37 | 7 | 0 | -3.753440 | -3.270617 | -0.695858 |
| 38 | 1 | 0 | -2.236572 | -4.666907 | -0.595593 |
| 39 | 1 | 0 | -5.116655 | -1.729463 | -0.849331 |
| 40 | 6 | 0 | -1.100680 | 1.451429  | 0.238410  |
| 41 | 6 | 0 | -1.274393 | 2.740752  | -0.265105 |
| 42 | 6 | 0 | -1.878354 | 1.008499  | 1.307990  |
| 43 | 6 | 0 | -2.229537 | 3.581250  | 0.305574  |
| 44 | 1 | 0 | -0.662074 | 3.073296  | -1.093559 |
| 45 | 6 | 0 | -2.821373 | 1.858695  | 1.871270  |
| 46 | 1 | 0 | -1.710782 | 0.004450  | 1.685643  |
| 47 | 6 | 0 | -3.017019 | 3.150830  | 1.377067  |
| 48 | 1 | 0 | -2.358190 | 4.585960  | -0.082407 |
| 49 | 1 | 0 | -3.421864 | 1.511514  | 2.712209  |
| 50 | 6 | 0 | -4.069234 | 4.057170  | 1.968597  |
| 51 | 1 | 0 | -3.742477 | 5.134026  | 1.919147  |
| 52 | 1 | 0 | -5.030950 | 3.961974  | 1.391874  |
| 53 | 1 | 0 | -4.269405 | 3.783786  | 3.034512  |

---

**TS3<sup>a</sup>**

---

| Center<br>Number | Atomic<br>Number | Atomic<br>Type | Coordinates (Angstroms) |           |           |
|------------------|------------------|----------------|-------------------------|-----------|-----------|
|                  |                  |                | X                       | Y         | Z         |
| 1                | 6                | 0              | -3.604044               | 0.568301  | 0.386907  |
| 2                | 6                | 0              | -2.416599               | 0.214973  | 1.009476  |
| 3                | 6                | 0              | -1.825952               | -1.120742 | -0.878044 |
| 4                | 6                | 0              | -2.999938               | -0.763071 | -1.524714 |
| 5                | 6                | 0              | -3.897359               | 0.067304  | -0.874069 |
| 6                | 1                | 0              | -4.286306               | 1.247101  | 0.884216  |
| 7                | 1                | 0              | -3.207983               | -1.143666 | -2.517389 |
| 8                | 6                | 0              | -1.457391               | -0.629903 | 0.397494  |
| 9                | 6                | 0              | 0.489142                | 0.732940  | 0.161347  |
| 10               | 6                | 0              | 1.390959                | -0.207142 | -0.062292 |
| 11               | 6                | 0              | 0.398835                | 2.059744  | -0.340526 |

|    |    |   |           |           |           |
|----|----|---|-----------|-----------|-----------|
| 12 | 8  | 0 | -0.391743 | 2.472828  | -1.187225 |
| 13 | 8  | 0 | 1.219211  | 2.941371  | 0.323366  |
| 14 | 6  | 0 | 1.041230  | 4.306579  | -0.030206 |
| 15 | 1  | 0 | 1.248649  | 4.471139  | -1.090626 |
| 16 | 1  | 0 | 0.019887  | 4.637237  | 0.176644  |
| 17 | 1  | 0 | 1.746136  | 4.872494  | 0.578645  |
| 18 | 7  | 0 | 1.186773  | -1.493215 | 0.598542  |
| 19 | 16 | 0 | -0.275310 | -1.639648 | 1.364680  |
| 20 | 8  | 0 | -0.686486 | -3.039955 | 1.233321  |
| 21 | 8  | 0 | -0.172356 | -1.098596 | 2.710857  |
| 22 | 1  | 0 | 1.326334  | -2.302579 | -0.005505 |
| 23 | 6  | 0 | 2.657641  | -0.194368 | -0.881875 |
| 24 | 1  | 0 | 2.634014  | 0.688730  | -1.528657 |
| 25 | 1  | 0 | 2.691187  | -1.074500 | -1.542187 |
| 26 | 6  | 0 | 3.923897  | -0.168168 | -0.018046 |
| 27 | 1  | 0 | 3.897618  | 0.730164  | 0.612002  |
| 28 | 1  | 0 | 3.917508  | -1.028512 | 0.662895  |
| 29 | 6  | 0 | 5.205766  | -0.180106 | -0.846251 |
| 30 | 1  | 0 | 5.200775  | 0.673240  | -1.538456 |
| 31 | 1  | 0 | 5.226749  | -1.083094 | -1.471999 |
| 32 | 6  | 0 | 6.470793  | -0.128597 | 0.007981  |
| 33 | 1  | 0 | 6.447631  | 0.775253  | 0.629428  |
| 34 | 1  | 0 | 6.471306  | -0.978988 | 0.701269  |
| 35 | 6  | 0 | 7.746507  | -0.145674 | -0.829984 |
| 36 | 1  | 0 | 7.774918  | 0.709753  | -1.512377 |
| 37 | 1  | 0 | 8.641077  | -0.105177 | -0.203066 |
| 38 | 1  | 0 | 7.801539  | -1.055334 | -1.436357 |
| 39 | 17 | 0 | -2.094660 | 1.041663  | 2.505441  |
| 40 | 17 | 0 | -0.742952 | -2.135897 | -1.803093 |
| 41 | 17 | 0 | -5.394353 | 0.504588  | -1.651106 |

---

**TS3<sup>b</sup>**

---

| Center<br>Number | Atomic<br>Number | Atomic<br>Type | Coordinates (Angstroms) |           |           |
|------------------|------------------|----------------|-------------------------|-----------|-----------|
|                  |                  |                | X                       | Y         | Z         |
| 1                | 6                | 0              | -3.953141               | 0.081189  | 0.736852  |
| 2                | 6                | 0              | -2.780888               | -0.526175 | 1.143420  |
| 3                | 6                | 0              | -2.143853               | -0.840846 | -1.185453 |
| 4                | 6                | 0              | -3.309667               | -0.222599 | -1.588653 |
| 5                | 6                | 0              | -4.219806               | 0.256582  | -0.630834 |
| 6                | 1                | 0              | -4.677521               | 0.414091  | 1.472402  |
| 7                | 1                | 0              | -2.562491               | -0.665941 | 2.195553  |

|    |    |   |           |           |           |
|----|----|---|-----------|-----------|-----------|
| 8  | 1  | 0 | -1.446869 | -1.225746 | -1.923138 |
| 9  | 1  | 0 | -3.537139 | -0.122408 | -2.644432 |
| 10 | 6  | 0 | -1.825115 | -0.908754 | 0.185522  |
| 11 | 6  | 0 | 0.082724  | 0.522875  | 0.298158  |
| 12 | 6  | 0 | 0.994626  | -0.263024 | -0.248376 |
| 13 | 6  | 0 | 0.027666  | 1.946908  | 0.298843  |
| 14 | 8  | 0 | -0.653929 | 2.660949  | -0.433749 |
| 15 | 8  | 0 | 0.742003  | 2.505860  | 1.331433  |
| 16 | 6  | 0 | 0.602087  | 3.914167  | 1.464892  |
| 17 | 1  | 0 | 0.960691  | 4.434328  | 0.572796  |
| 18 | 1  | 0 | -0.442028 | 4.192352  | 1.629615  |
| 19 | 1  | 0 | 1.204174  | 4.198621  | 2.327667  |
| 20 | 7  | 0 | 0.801228  | -1.700261 | -0.095830 |
| 21 | 16 | 0 | -0.593569 | -2.111573 | 0.693864  |
| 22 | 8  | 0 | -0.978415 | -3.425599 | 0.164350  |
| 23 | 8  | 0 | -0.416148 | -1.992045 | 2.137963  |
| 24 | 1  | 0 | 0.910664  | -2.263727 | -0.937698 |
| 25 | 6  | 0 | 2.268064  | 0.060581  | -0.989794 |
| 26 | 1  | 0 | 2.232714  | 1.115453  | -1.281821 |
| 27 | 1  | 0 | 2.324611  | -0.525902 | -1.919649 |
| 28 | 6  | 0 | 3.526685  | -0.204691 | -0.156025 |
| 29 | 1  | 0 | 3.481738  | 0.412514  | 0.750370  |
| 30 | 1  | 0 | 3.527193  | -1.250200 | 0.176699  |
| 31 | 6  | 0 | 4.815542  | 0.091096  | -0.918119 |
| 32 | 1  | 0 | 4.806470  | 1.135584  | -1.259171 |
| 33 | 1  | 0 | 4.852100  | -0.527888 | -1.825286 |
| 34 | 6  | 0 | 6.072886  | -0.157284 | -0.087485 |
| 35 | 1  | 0 | 6.034287  | 0.462416  | 0.817028  |
| 36 | 1  | 0 | 6.077742  | -1.200047 | 0.253692  |
| 37 | 6  | 0 | 7.355512  | 0.138199  | -0.860490 |
| 38 | 1  | 0 | 7.381119  | 1.182717  | -1.186815 |
| 39 | 1  | 0 | 8.244481  | -0.045350 | -0.251409 |
| 40 | 1  | 0 | 7.424402  | -0.490079 | -1.754201 |
| 41 | 6  | 0 | -5.434771 | 0.887809  | -1.049647 |
| 42 | 7  | 0 | -6.418174 | 1.400956  | -1.388581 |

---

**TS3<sup>c</sup>**

---

| Center<br>Number | Atomic<br>Number | Atomic<br>Type | Coordinates (Angstroms) |          |           |
|------------------|------------------|----------------|-------------------------|----------|-----------|
|                  |                  |                | X                       | Y        | Z         |
| 1                | 6                | 0              | -1.151171               | 1.115569 | -0.482600 |
| 2                | 6                | 0              | 0.104680                | 0.731006 | -0.337142 |

|    |    |   |           |           |           |
|----|----|---|-----------|-----------|-----------|
| 3  | 6  | 0 | -1.670253 | 2.237013  | -1.190835 |
| 4  | 8  | 0 | -2.099899 | 2.258444  | -2.342560 |
| 5  | 8  | 0 | -1.793739 | 3.344576  | -0.388214 |
| 6  | 6  | 0 | -2.442088 | 4.454896  | -0.994370 |
| 7  | 1  | 0 | -1.887232 | 4.808968  | -1.867090 |
| 8  | 1  | 0 | -3.454737 | 4.193659  | -1.311924 |
| 9  | 1  | 0 | -2.478791 | 5.236246  | -0.235543 |
| 10 | 7  | 0 | 0.342185  | -0.409686 | 0.551747  |
| 11 | 16 | 0 | -0.948247 | -0.664340 | 1.583601  |
| 12 | 8  | 0 | -0.815342 | -2.022961 | 2.113113  |
| 13 | 8  | 0 | -1.018630 | 0.434414  | 2.542536  |
| 14 | 6  | 0 | 1.385759  | 1.358199  | -0.837895 |
| 15 | 1  | 0 | 1.112220  | 2.192199  | -1.493167 |
| 16 | 1  | 0 | 1.954540  | 0.645746  | -1.451342 |
| 17 | 6  | 0 | 2.284389  | 1.854742  | 0.298925  |
| 18 | 1  | 0 | 1.708938  | 2.541150  | 0.934094  |
| 19 | 1  | 0 | 2.564625  | 1.003904  | 0.933154  |
| 20 | 6  | 0 | 3.544414  | 2.551562  | -0.207348 |
| 21 | 1  | 0 | 3.261858  | 3.403724  | -0.840821 |
| 22 | 1  | 0 | 4.106463  | 1.862322  | -0.852881 |
| 23 | 6  | 0 | 4.453068  | 3.040755  | 0.918579  |
| 24 | 1  | 0 | 3.889010  | 3.726242  | 1.563340  |
| 25 | 1  | 0 | 4.735575  | 2.187953  | 1.548438  |
| 26 | 6  | 0 | 5.708576  | 3.736806  | 0.399705  |
| 27 | 1  | 0 | 5.446689  | 4.607082  | -0.210422 |
| 28 | 1  | 0 | 6.346870  | 4.080124  | 1.218056  |
| 29 | 1  | 0 | 6.298589  | 3.059245  | -0.225641 |
| 30 | 6  | 0 | -2.419992 | -0.616121 | 0.557711  |
| 31 | 6  | 0 | -3.583286 | -0.041988 | 1.096089  |
| 32 | 6  | 0 | -2.574221 | -1.617094 | -0.417374 |
| 33 | 6  | 0 | -4.796680 | -0.354527 | 0.507485  |
| 34 | 1  | 0 | -3.519308 | 0.667953  | 1.912008  |
| 35 | 6  | 0 | -3.841808 | -1.834946 | -0.932143 |
| 36 | 1  | 0 | -1.721842 | -2.175638 | -0.789141 |
| 37 | 7  | 0 | -4.954373 | -1.220561 | -0.505456 |
| 38 | 1  | 0 | -5.705095 | 0.112337  | 0.883019  |
| 39 | 1  | 0 | -3.973649 | -2.567196 | -1.726279 |
| 40 | 6  | 0 | 1.077770  | -1.538057 | 0.067840  |
| 41 | 6  | 0 | 1.905440  | -2.252765 | 0.934621  |
| 42 | 6  | 0 | 1.017501  | -1.897618 | -1.279706 |
| 43 | 6  | 0 | 2.644289  | -3.328997 | 0.457334  |
| 44 | 1  | 0 | 1.960585  | -1.956564 | 1.976652  |
| 45 | 6  | 0 | 1.778075  | -2.964199 | -1.749394 |
| 46 | 1  | 0 | 0.380279  | -1.329110 | -1.951864 |

|    |   |   |          |           |           |
|----|---|---|----------|-----------|-----------|
| 47 | 6 | 0 | 2.595596 | -3.702488 | -0.889911 |
| 48 | 1 | 0 | 3.283899 | -3.881551 | 1.140289  |
| 49 | 1 | 0 | 1.731430 | -3.229564 | -2.801991 |
| 50 | 6 | 0 | 3.389922 | -4.880052 | -1.393657 |
| 51 | 1 | 0 | 4.339855 | -4.972190 | -0.861684 |
| 52 | 1 | 0 | 2.838054 | -5.813780 | -1.243752 |
| 53 | 1 | 0 | 3.599433 | -4.788038 | -2.461626 |

---

### Int5<sup>a</sup>

---

| Center<br>Number | Atomic<br>Number | Atomic<br>Type | Coordinates (Angstroms) |           |           |
|------------------|------------------|----------------|-------------------------|-----------|-----------|
|                  |                  |                | X                       | Y         | Z         |
| 1                | 6                | 0              | -3.585770               | 0.522382  | 0.403750  |
| 2                | 6                | 0              | -2.355949               | 0.283067  | 0.989728  |
| 3                | 6                | 0              | -1.705420               | -1.012374 | -0.894772 |
| 4                | 6                | 0              | -2.921661               | -0.759442 | -1.505322 |
| 5                | 6                | 0              | -3.864500               | 0.034055  | -0.867745 |
| 6                | 1                | 0              | -4.313113               | 1.132748  | 0.940681  |
| 7                | 1                | 0              | -3.148377               | -1.205151 | -2.467499 |
| 8                | 6                | 0              | -1.198159               | -0.354549 | 0.319424  |
| 9                | 6                | 0              | 0.261159                | 0.523181  | 0.067789  |
| 10               | 6                | 0              | 1.361555                | -0.270328 | -0.036082 |
| 11               | 6                | 0              | 0.185135                | 1.913158  | -0.367524 |
| 12               | 8                | 0              | -0.631665               | 2.377565  | -1.149002 |
| 13               | 8                | 0              | 1.090428                | 2.717608  | 0.262471  |
| 14               | 6                | 0              | 0.987624                | 4.118162  | -0.051055 |
| 15               | 1                | 0              | 1.174147                | 4.282381  | -1.109625 |
| 16               | 1                | 0              | -0.013357               | 4.489783  | 0.201141  |
| 17               | 1                | 0              | 1.743923                | 4.623092  | 0.553627  |
| 18               | 7                | 0              | 1.244019                | -1.535942 | 0.632471  |
| 19               | 16               | 0              | -0.252102               | -1.624374 | 1.383155  |
| 20               | 8                | 0              | -0.755113               | -2.995690 | 1.235645  |
| 21               | 8                | 0              | -0.109745               | -1.099321 | 2.734286  |
| 22               | 1                | 0              | 1.394725                | -2.346785 | 0.033277  |
| 23               | 6                | 0              | 2.648506                | -0.094623 | -0.810079 |
| 24               | 1                | 0              | 2.588438                | 0.840546  | -1.387883 |
| 25               | 1                | 0              | 2.705821                | -0.912764 | -1.550723 |
| 26               | 6                | 0              | 3.922726                | -0.102344 | 0.042481  |
| 27               | 1                | 0              | 3.919333                | 0.762421  | 0.714410  |
| 28               | 1                | 0              | 3.934561                | -0.996354 | 0.682268  |
| 29               | 6                | 0              | 5.187721                | -0.084331 | -0.825903 |
| 30               | 1                | 0              | 5.144563                | 0.792152  | -1.496326 |

|    |    |   |           |           |           |
|----|----|---|-----------|-----------|-----------|
| 31 | 1  | 0 | 5.196675  | -0.973404 | -1.473319 |
| 32 | 6  | 0 | 6.468815  | -0.036192 | -0.012083 |
| 33 | 1  | 0 | 6.466920  | 0.863294  | 0.621512  |
| 34 | 1  | 0 | 6.497750  | -0.890157 | 0.678765  |
| 35 | 6  | 0 | 7.728086  | -0.041635 | -0.879789 |
| 36 | 1  | 0 | 7.728084  | 0.818023  | -1.559864 |
| 37 | 1  | 0 | 8.636945  | -0.002009 | -0.280156 |
| 38 | 1  | 0 | 7.772151  | -0.946098 | -1.498646 |
| 39 | 17 | 0 | -2.067273 | 1.102159  | 2.508943  |
| 40 | 17 | 0 | -0.633559 | -2.072944 | -1.813084 |
| 41 | 17 | 0 | -5.391763 | 0.416634  | -1.652536 |

### Int5<sup>b</sup>

| Center<br>Number | Atomic<br>Number | Atomic<br>Type | Coordinates (Angstroms) |           |           |
|------------------|------------------|----------------|-------------------------|-----------|-----------|
|                  |                  |                | X                       | Y         | Z         |
| 1                | 6                | 0              | -3.869744               | 0.061832  | 0.750651  |
| 2                | 6                | 0              | -2.627356               | -0.366191 | 1.149638  |
| 3                | 6                | 0              | -2.020577               | -0.685688 | -1.197193 |
| 4                | 6                | 0              | -3.258508               | -0.238540 | -1.570307 |
| 5                | 6                | 0              | -4.212266               | 0.241514  | -0.624423 |
| 6                | 1                | 0              | -4.624314               | 0.264432  | 1.501799  |
| 7                | 1                | 0              | -2.422277               | -0.490564 | 2.210225  |
| 8                | 1                | 0              | -1.344585               | -1.066940 | -1.953062 |
| 9                | 1                | 0              | -3.544964               | -0.281169 | -2.627118 |
| 10               | 6                | 0              | -1.464269               | -0.490223 | 0.198681  |
| 11               | 6                | 0              | -0.167052               | 0.335248  | 0.177070  |
| 12               | 6                | 0              | 0.974298                | -0.316083 | -0.220964 |
| 13               | 6                | 0              | -0.188399               | 1.835601  | 0.319069  |
| 14               | 8                | 0              | -0.935713               | 2.569890  | -0.280298 |
| 15               | 8                | 0              | 0.695798                | 2.313485  | 1.227705  |
| 16               | 6                | 0              | 0.620430                | 3.732727  | 1.453740  |
| 17               | 1                | 0              | 0.875973                | 4.276478  | 0.546450  |
| 18               | 1                | 0              | -0.393355               | 4.016357  | 1.762620  |
| 19               | 1                | 0              | 1.330822                | 3.947743  | 2.253305  |
| 20               | 7                | 0              | 0.878685                | -1.723847 | -0.109612 |
| 21               | 16               | 0              | -0.563443               | -2.102710 | 0.656465  |
| 22               | 8                | 0              | -1.059121               | -3.354141 | 0.067567  |
| 23               | 8                | 0              | -0.346309               | -2.076280 | 2.102057  |
| 24               | 1                | 0              | 1.028222                | -2.272855 | -0.959557 |
| 25               | 6                | 0              | 2.250308                | 0.192920  | -0.861453 |
| 26               | 1                | 0              | 2.177662                | 1.276196  | -0.998064 |



|    |   |   |           |           |           |
|----|---|---|-----------|-----------|-----------|
| 27 | 1 | 0 | 2.271729  | -0.253595 | -1.872808 |
| 28 | 6 | 0 | 3.536710  | -0.188149 | -0.109677 |
| 29 | 1 | 0 | 3.540678  | 0.331895  | 0.855717  |
| 30 | 1 | 0 | 3.532251  | -1.267665 | 0.099205  |
| 31 | 6 | 0 | 4.796200  | 0.172943  | -0.893819 |
| 32 | 1 | 0 | 4.761113  | 1.242910  | -1.170886 |
| 33 | 1 | 0 | 4.804191  | -0.388641 | -1.841268 |
| 34 | 6 | 0 | 6.072668  | -0.109553 | -0.115327 |
| 35 | 1 | 0 | 6.051822  | 0.451848  | 0.830078  |
| 36 | 1 | 0 | 6.094811  | -1.178220 | 0.160886  |
| 37 | 6 | 0 | 7.335238  | 0.244515  | -0.890318 |
| 38 | 1 | 0 | 7.343361  | 1.304601  | -1.152166 |
| 39 | 1 | 0 | 8.241245  | 0.033172  | -0.307629 |
| 40 | 1 | 0 | 7.406702  | -0.335512 | -1.815887 |
| 41 | 6 | 0 | -5.440430 | 0.800166  | -1.021631 |
| 42 | 7 | 0 | -6.446791 | 1.305423  | -1.350953 |

---

### Int5<sup>c</sup>

---

| Center<br>Number | Atomic<br>Number | Atomic<br>Type | Coordinates (Angstroms) |           |           |
|------------------|------------------|----------------|-------------------------|-----------|-----------|
|                  |                  |                | X                       | Y         | Z         |
| 1                | 6                | 0              | -1.348126               | 0.819837  | -0.317794 |
| 2                | 6                | 0              | -0.001034               | 0.706373  | -0.229578 |
| 3                | 6                | 0              | -1.980886               | 1.978007  | -1.050102 |
| 4                | 8                | 0              | -2.451918               | 1.902998  | -2.165688 |
| 5                | 8                | 0              | -2.018106               | 3.104607  | -0.342930 |
| 6                | 6                | 0              | -2.748867               | 4.198787  | -0.937948 |
| 7                | 1                | 0              | -2.257381               | 4.513126  | -1.866972 |
| 8                | 1                | 0              | -3.773141               | 3.883573  | -1.161772 |
| 9                | 1                | 0              | -2.735988               | 4.997596  | -0.208269 |
| 10               | 7                | 0              | 0.417532                | -0.345410 | 0.642417  |
| 11               | 16               | 0              | -0.946759               | -0.722356 | 1.584999  |
| 12               | 8                | 0              | -0.829711               | -2.131798 | 1.994643  |
| 13               | 8                | 0              | -1.037639               | 0.291663  | 2.645573  |
| 14               | 6                | 0              | 1.141780                | 1.540336  | -0.806441 |
| 15               | 1                | 0              | 0.725220                | 2.433418  | -1.289316 |
| 16               | 1                | 0              | 1.631816                | 0.947619  | -1.596642 |
| 17               | 6                | 0              | 2.181523                | 1.918091  | 0.267548  |
| 18               | 1                | 0              | 1.684324                | 2.490629  | 1.063562  |
| 19               | 1                | 0              | 2.558522                | 0.999193  | 0.741078  |
| 20               | 6                | 0              | 3.357832                | 2.717774  | -0.281251 |
| 21               | 1                | 0              | 2.990842                | 3.621783  | -0.787633 |

|    |   |   |           |           |           |
|----|---|---|-----------|-----------|-----------|
| 22 | 1 | 0 | 3.879794  | 2.126167  | -1.049570 |
| 23 | 6 | 0 | 4.361722  | 3.122556  | 0.807715  |
| 24 | 1 | 0 | 3.827117  | 3.707708  | 1.576494  |
| 25 | 1 | 0 | 4.729895  | 2.227932  | 1.308590  |
| 26 | 6 | 0 | 5.530837  | 3.936143  | 0.268854  |
| 27 | 1 | 0 | 5.184055  | 4.857963  | -0.211345 |
| 28 | 1 | 0 | 6.224817  | 4.220006  | 1.060967  |
| 29 | 1 | 0 | 6.091826  | 3.368872  | -0.483034 |
| 30 | 6 | 0 | -2.224082 | -0.287734 | 0.236012  |
| 31 | 6 | 0 | -3.541906 | -0.099555 | 0.948916  |
| 32 | 6 | 0 | -2.407056 | -1.533551 | -0.595988 |
| 33 | 6 | 0 | -4.719877 | -0.644919 | 0.473675  |
| 34 | 1 | 0 | -3.579174 | 0.595283  | 1.787805  |
| 35 | 6 | 0 | -3.657885 | -1.989827 | -0.973265 |
| 36 | 1 | 0 | -1.533668 | -2.026570 | -1.008136 |
| 37 | 7 | 0 | -4.867637 | -1.538745 | -0.537281 |
| 38 | 1 | 0 | -5.660985 | -0.361027 | 0.970706  |
| 39 | 1 | 0 | -3.715244 | -2.815493 | -1.698116 |
| 40 | 6 | 0 | 1.228593  | -1.405018 | 0.114002  |
| 41 | 6 | 0 | 2.089587  | -2.070773 | 0.984704  |
| 42 | 6 | 0 | 1.185063  | -1.765462 | -1.233304 |
| 43 | 6 | 0 | 2.910114  | -3.087924 | 0.499485  |
| 44 | 1 | 0 | 2.122159  | -1.774237 | 2.028154  |
| 45 | 6 | 0 | 2.026632  | -2.763150 | -1.701778 |
| 46 | 1 | 0 | 0.503378  | -1.254522 | -1.898201 |
| 47 | 6 | 0 | 2.890837  | -3.449697 | -0.850391 |
| 48 | 1 | 0 | 3.580189  | -3.597577 | 1.184717  |
| 49 | 1 | 0 | 1.996030  | -3.030506 | -2.754595 |
| 50 | 6 | 0 | 3.797624  | -4.545487 | -1.359018 |
| 51 | 1 | 0 | 4.822724  | -4.397711 | -1.008565 |
| 52 | 1 | 0 | 3.466441  | -5.522154 | -0.982649 |
| 53 | 1 | 0 | 3.799767  | -4.572895 | -2.450291 |

---

**Int0<sup>a</sup>**

---

| Center<br>Number | Atomic<br>Number | Atomic<br>Type | Coordinates (Angstroms) |          |           |
|------------------|------------------|----------------|-------------------------|----------|-----------|
|                  |                  |                | X                       | Y        | Z         |
| 1                | 6                | 0              | 0.429925                | 3.294512 | 0.338101  |
| 2                | 6                | 0              | -0.275686               | 2.157212 | -0.046852 |
| 3                | 6                | 0              | 1.523591                | 1.555272 | -1.526390 |
| 4                | 6                | 0              | 2.234538                | 2.686677 | -1.150829 |
| 5                | 6                | 0              | 1.666892                | 3.553821 | -0.228212 |

|    |    |   |           |           |           |
|----|----|---|-----------|-----------|-----------|
| 6  | 1  | 0 | 0.010457  | 3.958887  | 1.083151  |
| 7  | 1  | 0 | 3.217876  | 2.873736  | -1.563449 |
| 8  | 6  | 0 | 0.240140  | 1.279816  | -1.017698 |
| 9  | 6  | 0 | -0.375456 | -1.121732 | 1.470846  |
| 10 | 6  | 0 | 0.545514  | -1.277344 | 0.532637  |
| 11 | 6  | 0 | 0.030672  | -0.803960 | 2.796370  |
| 12 | 8  | 0 | -0.080082 | -1.493757 | 3.809143  |
| 13 | 8  | 0 | 0.487143  | 0.488688  | 2.899292  |
| 14 | 7  | 0 | 0.119163  | -1.472500 | -0.880399 |
| 15 | 16 | 0 | -0.625024 | -0.197834 | -1.610457 |
| 16 | 8  | 0 | -0.423204 | -0.315949 | -3.045082 |
| 17 | 8  | 0 | -2.017013 | -0.152234 | -1.152996 |
| 18 | 1  | 0 | 0.853738  | -1.802255 | -1.507990 |
| 19 | 6  | 0 | 0.806775  | 0.923737  | 4.209953  |
| 20 | 1  | 0 | 1.617381  | 0.330246  | 4.637372  |
| 21 | 1  | 0 | 1.124241  | 1.961935  | 4.117061  |
| 22 | 1  | 0 | -2.272699 | -1.645595 | 1.397922  |
| 23 | 6  | 0 | -3.855038 | -1.168679 | 0.820183  |
| 24 | 8  | 0 | -2.852839 | -2.056385 | 1.197809  |
| 25 | 8  | 0 | -4.539572 | -1.565796 | -0.148988 |
| 26 | 8  | 0 | -3.959609 | -0.105052 | 1.445038  |
| 27 | 19 | 0 | -2.584834 | -3.013733 | -1.205151 |
| 28 | 19 | 0 | -4.494023 | 0.978201  | -0.917382 |
| 29 | 1  | 0 | -0.057563 | 0.852820  | 4.877178  |
| 30 | 6  | 0 | 2.049159  | -1.193280 | 0.664434  |
| 31 | 1  | 0 | 2.277060  | -1.062339 | 1.727134  |
| 32 | 1  | 0 | 2.431765  | -0.292499 | 0.159537  |
| 33 | 6  | 0 | 2.816320  | -2.404099 | 0.146193  |
| 34 | 1  | 0 | 2.637484  | -2.551470 | -0.929333 |
| 35 | 1  | 0 | 2.452696  | -3.310882 | 0.645454  |
| 36 | 6  | 0 | 4.321926  | -2.261850 | 0.358071  |
| 37 | 1  | 0 | 4.521749  | -2.127379 | 1.428711  |
| 38 | 1  | 0 | 4.670262  | -1.346949 | -0.141200 |
| 39 | 6  | 0 | 5.111636  | -3.456925 | -0.163620 |
| 40 | 1  | 0 | 4.759082  | -4.368553 | 0.334460  |
| 41 | 1  | 0 | 4.903254  | -3.588413 | -1.232805 |
| 42 | 6  | 0 | 6.614317  | -3.298854 | 0.052650  |
| 43 | 1  | 0 | 6.844979  | -3.192440 | 1.117269  |
| 44 | 1  | 0 | 7.172825  | -4.161480 | -0.326702 |
| 45 | 1  | 0 | 6.989032  | -2.406757 | -0.459022 |
| 46 | 17 | 0 | -1.770340 | 1.897876  | 0.782057  |
| 47 | 17 | 0 | 2.366186  | 0.471627  | -2.598660 |
| 48 | 17 | 0 | 2.538328  | 4.974336  | 0.247469  |

---

**Int0<sup>b</sup>**

---

| Center<br>Number | Atomic<br>Number | Atomic<br>Type | Coordinates (Angstroms) |           |           |
|------------------|------------------|----------------|-------------------------|-----------|-----------|
|                  |                  |                | X                       | Y         | Z         |
| 1                | 6                | 0              | -0.348402               | 3.020204  | 0.377035  |
| 2                | 6                | 0              | -0.714467               | 1.742042  | -0.030749 |
| 3                | 6                | 0              | 0.462279                | 2.104030  | -2.148432 |
| 4                | 6                | 0              | 0.815374                | 3.382637  | -1.738216 |
| 5                | 6                | 0              | 0.409860                | 3.829999  | -0.475084 |
| 6                | 1                | 0              | -0.644578               | 3.387437  | 1.353093  |
| 7                | 1                | 0              | -1.285524               | 1.086469  | 0.621798  |
| 8                | 1                | 0              | 0.761946                | 1.725808  | -3.119602 |
| 9                | 1                | 0              | 1.398521                | 4.028414  | -2.384010 |
| 10               | 6                | 0              | -0.297755               | 1.312424  | -1.290579 |
| 11               | 6                | 0              | 0.274339                | -1.066723 | 1.282351  |
| 12               | 6                | 0              | 1.018884                | -0.985808 | 0.192610  |
| 13               | 6                | 0              | 0.814330                | -0.631600 | 2.532434  |
| 14               | 8                | 0              | 1.188063                | -1.339818 | 3.466574  |
| 15               | 8                | 0              | 0.793690                | 0.729920  | 2.674181  |
| 16               | 7                | 0              | 0.458030                | -1.348291 | -1.127243 |
| 17               | 16               | 0              | -0.676734               | -0.348205 | -1.801452 |
| 18               | 8                | 0              | -0.517078               | -0.460588 | -3.248199 |
| 19               | 8                | 0              | -1.993324               | -0.668909 | -1.229436 |
| 20               | 1                | 0              | 1.159627                | -1.511399 | -1.847308 |
| 21               | 6                | 0              | 1.233104                | 1.227424  | 3.930550  |
| 22               | 1                | 0              | 2.270993                | 0.944101  | 4.124253  |
| 23               | 1                | 0              | 1.143797                | 2.311104  | 3.874030  |
| 24               | 1                | 0              | -1.505264               | -1.743151 | 1.512729  |
| 25               | 6                | 0              | -3.129522               | -1.115795 | 1.285615  |
| 26               | 8                | 0              | -2.162469               | -2.087514 | 1.470889  |
| 27               | 8                | 0              | -4.171027               | -1.529351 | 0.720486  |
| 28               | 8                | 0              | -2.874293               | 0.045257  | 1.652147  |
| 29               | 19               | 0              | -2.826601               | -3.254155 | -0.777586 |
| 30               | 19               | 0              | -4.214711               | 0.820139  | -0.500055 |
| 31               | 1                | 0              | 0.609520                | 0.841144  | 4.744303  |
| 32               | 6                | 0              | 0.780947                | 5.154068  | -0.044103 |
| 33               | 7                | 0              | 1.077607                | 6.217395  | 0.302627  |
| 34               | 6                | 0              | 2.445367                | -0.510548 | 0.073893  |
| 35               | 1                | 0              | 2.730966                | -0.036381 | 1.020854  |
| 36               | 1                | 0              | 2.523200                | 0.270072  | -0.703563 |
| 37               | 6                | 0              | 3.443930                | -1.630270 | -0.240048 |
| 38               | 1                | 0              | 3.160489                | -2.144116 | -1.169604 |

|    |   |   |          |           |           |
|----|---|---|----------|-----------|-----------|
| 39 | 1 | 0 | 3.389715 | -2.379869 | 0.555319  |
| 40 | 6 | 0 | 4.870175 | -1.116521 | -0.378728 |
| 41 | 1 | 0 | 5.162131 | -0.604145 | 0.548070  |
| 42 | 1 | 0 | 4.908651 | -0.360214 | -1.174594 |
| 43 | 6 | 0 | 5.877172 | -2.223286 | -0.683901 |
| 44 | 1 | 0 | 5.836518 | -2.976192 | 0.112909  |
| 45 | 1 | 0 | 5.580060 | -2.735195 | -1.607781 |
| 46 | 6 | 0 | 7.302599 | -1.695376 | -0.822936 |
| 47 | 1 | 0 | 7.626840 | -1.203542 | 0.099558  |
| 48 | 1 | 0 | 8.009899 | -2.499469 | -1.041720 |
| 49 | 1 | 0 | 7.367932 | -0.960401 | -1.631434 |

---

### Int0<sup>c</sup>

| Center<br>Number | Atomic<br>Number | Atomic<br>Type | Coordinates (Angstroms) |           |           |
|------------------|------------------|----------------|-------------------------|-----------|-----------|
|                  |                  |                | X                       | Y         | Z         |
| 1                | 6                | 0              | 0.517283                | -1.312670 | 1.072523  |
| 2                | 6                | 0              | 0.812706                | -0.110929 | 0.594915  |
| 3                | 6                | 0              | 1.408143                | -1.986957 | 1.963165  |
| 4                | 8                | 0              | 1.411117                | -1.963689 | 3.194316  |
| 5                | 8                | 0              | 2.260049                | -2.845117 | 1.298785  |
| 6                | 6                | 0              | 3.077316                | -3.648134 | 2.137325  |
| 7                | 1                | 0              | 3.731009                | -3.034020 | 2.762803  |
| 8                | 1                | 0              | 2.472565                | -4.281042 | 2.792472  |
| 9                | 1                | 0              | 3.678336                | -4.269542 | 1.473042  |
| 10               | 7                | 0              | -0.106011               | 0.586727  | -0.338671 |
| 11               | 16               | 0              | -0.546341               | -0.193008 | -1.724604 |
| 12               | 8                | 0              | -1.219260               | 0.785534  | -2.578416 |
| 13               | 8                | 0              | 0.615640                | -0.904280 | -2.242651 |
| 14               | 6                | 0              | 2.038666                | 0.748612  | 0.820533  |
| 15               | 1                | 0              | 2.540536                | 0.412986  | 1.736078  |
| 16               | 1                | 0              | 1.734337                | 1.793244  | 0.986501  |
| 17               | 6                | 0              | 3.020293                | 0.699927  | -0.353741 |
| 18               | 1                | 0              | 3.364412                | -0.335435 | -0.477265 |
| 19               | 1                | 0              | 2.484931                | 0.958402  | -1.276371 |
| 20               | 6                | 0              | 4.221025                | 1.625024  | -0.174043 |
| 21               | 1                | 0              | 4.743025                | 1.370550  | 0.759179  |
| 22               | 1                | 0              | 3.869596                | 2.659640  | -0.055598 |
| 23               | 6                | 0              | 5.209348                | 1.559520  | -1.336639 |
| 24               | 1                | 0              | 5.557648                | 0.525643  | -1.453847 |
| 25               | 1                | 0              | 4.686463                | 1.814897  | -2.266910 |

|    |   |   |           |           |           |
|----|---|---|-----------|-----------|-----------|
| 26 | 6 | 0 | 6.406157  | 2.487788  | -1.146445 |
| 27 | 1 | 0 | 6.956691  | 2.230548  | -0.235892 |
| 28 | 1 | 0 | 7.101785  | 2.427865  | -1.987688 |
| 29 | 1 | 0 | 6.080136  | 3.528660  | -1.053258 |
| 30 | 6 | 0 | -1.795528 | -1.408906 | -1.321600 |
| 31 | 6 | 0 | -1.439106 | -2.728877 | -1.078525 |
| 32 | 6 | 0 | -3.124727 | -1.015145 | -1.246580 |
| 33 | 6 | 0 | -2.464863 | -3.620581 | -0.780317 |
| 34 | 1 | 0 | -0.402950 | -3.039857 | -1.113951 |
| 35 | 6 | 0 | -4.064708 | -1.992909 | -0.922038 |
| 36 | 1 | 0 | -3.420796 | 0.008284  | -1.446709 |
| 37 | 7 | 0 | -3.753440 | -3.270617 | -0.695858 |
| 38 | 1 | 0 | -2.236572 | -4.666907 | -0.595593 |
| 39 | 1 | 0 | -5.116655 | -1.729463 | -0.849331 |
| 40 | 6 | 0 | -1.100680 | 1.451429  | 0.238410  |
| 41 | 6 | 0 | -1.274393 | 2.740752  | -0.265105 |
| 42 | 6 | 0 | -1.878354 | 1.008499  | 1.307990  |
| 43 | 6 | 0 | -2.229537 | 3.581250  | 0.305574  |
| 44 | 1 | 0 | -0.662074 | 3.073296  | -1.093559 |
| 45 | 6 | 0 | -2.821373 | 1.858695  | 1.871270  |
| 46 | 1 | 0 | -1.710782 | 0.004450  | 1.685643  |
| 47 | 6 | 0 | -3.017019 | 3.150830  | 1.377067  |
| 48 | 1 | 0 | -2.358190 | 4.585960  | -0.082407 |
| 49 | 1 | 0 | -3.421864 | 1.511514  | 2.712209  |
| 50 | 6 | 0 | -4.069234 | 4.057170  | 1.968597  |
| 51 | 1 | 0 | -3.742477 | 5.134026  | 1.919147  |
| 52 | 1 | 0 | -5.030950 | 3.961974  | 1.391874  |
| 53 | 1 | 0 | -4.269405 | 3.783786  | 3.034512  |

---

**TS4<sup>a</sup>**

---

| Center<br>Number | Atomic<br>Number | Atomic<br>Type | Coordinates (Angstroms) |           |           |
|------------------|------------------|----------------|-------------------------|-----------|-----------|
|                  |                  |                | X                       | Y         | Z         |
| 1                | 6                | 0              | 0.436541                | 3.278888  | 0.333103  |
| 2                | 6                | 0              | -0.269505               | 2.142985  | -0.054871 |
| 3                | 6                | 0              | 1.532645                | 1.540587  | -1.531089 |
| 4                | 6                | 0              | 2.243788                | 2.670881  | -1.152681 |
| 5                | 6                | 0              | 1.674818                | 3.537829  | -0.230613 |
| 6                | 1                | 0              | 0.016534                | 3.942368  | 1.078658  |
| 7                | 1                | 0              | 3.228659                | 2.856858  | -1.562127 |
| 8                | 6                | 0              | 0.247249                | 1.266795  | -1.026486 |
| 9                | 6                | 0              | -0.418709               | -1.142350 | 1.443814  |

|    |    |   |           |           |           |
|----|----|---|-----------|-----------|-----------|
| 10 | 6  | 0 | 0.528346  | -1.280656 | 0.512471  |
| 11 | 6  | 0 | -0.010347 | -0.765162 | 2.801089  |
| 12 | 8  | 0 | -0.176269 | -1.428885 | 3.809097  |
| 13 | 8  | 0 | 0.513507  | 0.484734  | 2.856873  |
| 14 | 7  | 0 | 0.118680  | -1.489261 | -0.878436 |
| 15 | 16 | 0 | -0.624039 | -0.203933 | -1.622608 |
| 16 | 8  | 0 | -0.403142 | -0.337532 | -3.054794 |
| 17 | 8  | 0 | -2.007944 | -0.159799 | -1.171284 |
| 18 | 1  | 0 | 0.854872  | -1.830055 | -1.495807 |
| 19 | 6  | 0 | 0.832172  | 0.954494  | 4.165805  |
| 20 | 1  | 0 | 1.604542  | 0.331508  | 4.622620  |
| 21 | 1  | 0 | 1.195638  | 1.973036  | 4.038417  |
| 22 | 1  | 0 | -1.770656 | -1.481699 | 1.330026  |
| 23 | 6  | 0 | -3.824261 | -1.170916 | 0.838988  |
| 24 | 8  | 0 | -2.848025 | -2.005442 | 1.219987  |
| 25 | 8  | 0 | -4.538181 | -1.538821 | -0.157478 |
| 26 | 8  | 0 | -3.980205 | -0.070637 | 1.439356  |
| 27 | 19 | 0 | -2.599620 | -3.016112 | -1.160702 |
| 28 | 19 | 0 | -4.488759 | 0.978633  | -0.925131 |
| 29 | 1  | 0 | -0.053194 | 0.944253  | 4.805049  |
| 30 | 6  | 0 | 2.029737  | -1.191049 | 0.681770  |
| 31 | 1  | 0 | 2.249867  | -1.070721 | 1.746404  |
| 32 | 1  | 0 | 2.409658  | -0.286899 | 0.184773  |
| 33 | 6  | 0 | 2.805699  | -2.403442 | 0.152195  |
| 34 | 1  | 0 | 2.640115  | -2.536049 | -0.926642 |
| 35 | 1  | 0 | 2.435842  | -3.314211 | 0.639387  |
| 36 | 6  | 0 | 4.308779  | -2.263661 | 0.383076  |
| 37 | 1  | 0 | 4.501004  | -2.140813 | 1.457359  |
| 38 | 1  | 0 | 4.662821  | -1.343599 | -0.102440 |
| 39 | 6  | 0 | 5.108816  | -3.453351 | -0.142420 |
| 40 | 1  | 0 | 4.749677  | -4.370308 | 0.340925  |
| 41 | 1  | 0 | 4.913540  | -3.572449 | -1.215503 |
| 42 | 6  | 0 | 6.608786  | -3.298633 | 0.094109  |
| 43 | 1  | 0 | 6.826394  | -3.204570 | 1.162621  |
| 44 | 1  | 0 | 7.166632  | -4.157217 | -0.288299 |
| 45 | 1  | 0 | 6.990174  | -2.400990 | -0.402704 |
| 46 | 17 | 0 | -1.764630 | 1.881332  | 0.772352  |
| 47 | 17 | 0 | 2.378215  | 0.454526  | -2.598302 |
| 48 | 17 | 0 | 2.546751  | 4.956675  | 0.248613  |

---

**TS4<sup>b</sup>**

| Center<br>Number | Atomic<br>Number | Atomic<br>Type | Coordinates (Angstroms) |           |           |
|------------------|------------------|----------------|-------------------------|-----------|-----------|
|                  |                  |                | X                       | Y         | Z         |
| 1                | 6                | 0              | -0.351359               | 3.020634  | 0.370437  |
| 2                | 6                | 0              | -0.719032               | 1.743856  | -0.040244 |
| 3                | 6                | 0              | 0.483102                | 2.098483  | -2.145213 |
| 4                | 6                | 0              | 0.837757                | 3.375687  | -1.732026 |
| 5                | 6                | 0              | 0.420413                | 3.825951  | -0.473765 |
| 6                | 1                | 0              | -0.656614               | 3.390312  | 1.342784  |
| 7                | 1                | 0              | -1.318984               | 1.096085  | 0.601779  |
| 8                | 1                | 0              | 0.791680                | 1.718108  | -3.112761 |
| 9                | 1                | 0              | 1.431099                | 4.018144  | -2.371811 |
| 10               | 6                | 0              | -0.290132               | 1.311384  | -1.295006 |
| 11               | 6                | 0              | 0.229965                | -1.077529 | 1.267841  |
| 12               | 6                | 0              | 1.003659                | -0.993512 | 0.185155  |
| 13               | 6                | 0              | 0.769744                | -0.619855 | 2.552168  |
| 14               | 8                | 0              | 1.071289                | -1.330888 | 3.494543  |
| 15               | 8                | 0              | 0.817540                | 0.732438  | 2.645521  |
| 16               | 7                | 0              | 0.461255                | -1.349849 | -1.122980 |
| 17               | 16               | 0              | -0.675086               | -0.348191 | -1.807484 |
| 18               | 8                | 0              | -0.498345               | -0.462524 | -3.252809 |
| 19               | 8                | 0              | -1.988599               | -0.667887 | -1.239696 |
| 20               | 1                | 0              | 1.172017                | -1.516526 | -1.834024 |
| 21               | 6                | 0              | 1.235604                | 1.242654  | 3.911053  |
| 22               | 1                | 0              | 2.253736                | 0.920293  | 4.140435  |
| 23               | 1                | 0              | 1.194134                | 2.327408  | 3.825019  |
| 24               | 1                | 0              | -1.072959               | -1.572337 | 1.383695  |
| 25               | 6                | 0              | -3.102312               | -1.139357 | 1.283821  |
| 26               | 8                | 0              | -2.165198               | -2.066899 | 1.481471  |
| 27               | 8                | 0              | -4.173589               | -1.511777 | 0.697331  |
| 28               | 8                | 0              | -2.878191               | 0.058573  | 1.636002  |
| 29               | 19               | 0              | -2.809698               | -3.256854 | -0.756930 |
| 30               | 19               | 0              | -4.212627               | 0.818638  | -0.513989 |
| 31               | 1                | 0              | 0.569117                | 0.899199  | 4.705028  |
| 32               | 6                | 0              | 0.793312                | 5.148423  | -0.039395 |
| 33               | 7                | 0              | 1.091448                | 6.210397  | 0.310172  |
| 34               | 6                | 0              | 2.436972                | -0.520264 | 0.099416  |
| 35               | 1                | 0              | 2.721061                | -0.068929 | 1.055323  |
| 36               | 1                | 0              | 2.510918                | 0.273672  | -0.659357 |
| 37               | 6                | 0              | 3.432202                | -1.637863 | -0.240772 |
| 38               | 1                | 0              | 3.154716                | -2.130173 | -1.183587 |
| 39               | 1                | 0              | 3.374453                | -2.409274 | 0.537198  |



|    |   |   |          |           |           |
|----|---|---|----------|-----------|-----------|
| 40 | 6 | 0 | 4.865768 | -1.126266 | -0.357865 |
| 41 | 1 | 0 | 5.153291 | -0.636906 | 0.582606  |
| 42 | 1 | 0 | 4.912231 | -0.351688 | -1.135496 |
| 43 | 6 | 0 | 5.870666 | -2.229355 | -0.682416 |
| 44 | 1 | 0 | 5.821474 | -3.001093 | 0.095679  |
| 45 | 1 | 0 | 5.578326 | -2.717637 | -1.620479 |
| 46 | 6 | 0 | 7.298949 | -1.703660 | -0.798486 |
| 47 | 1 | 0 | 7.618655 | -1.236152 | 0.138114  |
| 48 | 1 | 0 | 8.004722 | -2.504818 | -1.032388 |
| 49 | 1 | 0 | 7.372642 | -0.949101 | -1.588020 |

---

### TS4<sup>c</sup>

---

| Center<br>Number | Atomic<br>Number | Atomic<br>Type | Coordinates (Angstroms) |           |           |
|------------------|------------------|----------------|-------------------------|-----------|-----------|
|                  |                  |                | X                       | Y         | Z         |
| 1                | 6                | 0              | 0.298207                | 0.864616  | -1.390846 |
| 2                | 6                | 0              | -0.542728               | 0.494113  | -0.423793 |
| 3                | 6                | 0              | 0.122819                | 2.207903  | -1.956687 |
| 4                | 8                | 0              | -0.373665               | 2.465499  | -3.039865 |
| 5                | 8                | 0              | 0.657001                | 3.178638  | -1.176807 |
| 6                | 7                | 0              | -0.384929               | -0.804129 | 0.230247  |
| 7                | 16               | 0              | 0.894998                | -1.030824 | 1.248783  |
| 8                | 8                | 0              | 0.508344                | -2.007423 | 2.262778  |
| 9                | 8                | 0              | 2.119858                | -1.315676 | 0.487011  |
| 10               | 6                | 0              | 0.577168                | 4.500612  | -1.709453 |
| 11               | 1                | 0              | -0.464825               | 4.794831  | -1.853822 |
| 12               | 1                | 0              | 1.054176                | 5.148444  | -0.975780 |
| 13               | 1                | 0              | 1.348819                | 0.135831  | -1.957375 |
| 14               | 6                | 0              | 3.366061                | -0.333693 | -1.828481 |
| 15               | 8                | 0              | 2.210196                | -0.535709 | -2.461559 |
| 16               | 8                | 0              | 4.175896                | -1.319109 | -1.766611 |
| 17               | 8                | 0              | 3.591519                | 0.789757  | -1.284897 |
| 18               | 19               | 0              | 2.181366                | -3.036156 | -1.662480 |
| 19               | 19               | 0              | 4.774399                | -0.507963 | 0.670243  |
| 20               | 1                | 0              | 1.098188                | 4.563362  | -2.667068 |
| 21               | 6                | 0              | -1.695669               | 1.311041  | 0.129603  |
| 22               | 1                | 0              | -1.379615               | 2.360714  | 0.174525  |
| 23               | 1                | 0              | -1.911587               | 1.002634  | 1.160623  |
| 24               | 6                | 0              | -2.976658               | 1.215080  | -0.710876 |
| 25               | 1                | 0              | -3.296894               | 0.167284  | -0.777167 |
| 26               | 1                | 0              | -2.745979               | 1.540837  | -1.733424 |
| 27               | 6                | 0              | -4.112105               | 2.059023  | -0.139482 |

|    |   |   |           |           |           |
|----|---|---|-----------|-----------|-----------|
| 28 | 1 | 0 | -3.786983 | 3.106037  | -0.063314 |
| 29 | 1 | 0 | -4.328036 | 1.727988  | 0.886130  |
| 30 | 6 | 0 | -5.390427 | 1.985665  | -0.971681 |
| 31 | 1 | 0 | -5.171971 | 2.313594  | -1.995598 |
| 32 | 1 | 0 | -5.711167 | 0.938883  | -1.045051 |
| 33 | 6 | 0 | -6.519529 | 2.831573  | -0.389044 |
| 34 | 1 | 0 | -6.226640 | 3.884739  | -0.331946 |
| 35 | 1 | 0 | -7.426094 | 2.767480  | -0.996434 |
| 36 | 1 | 0 | -6.769434 | 2.501690  | 0.624343  |
| 37 | 6 | 0 | -1.529578 | -1.669983 | 0.301402  |
| 38 | 6 | 0 | -1.898194 | -2.341926 | -0.863456 |
| 39 | 6 | 0 | -2.329272 | -1.765514 | 1.439970  |
| 40 | 6 | 0 | -3.062256 | -3.102961 | -0.888795 |
| 41 | 1 | 0 | -1.282778 | -2.233105 | -1.751475 |
| 42 | 6 | 0 | -3.483827 | -2.540209 | 1.406705  |
| 43 | 1 | 0 | -2.047952 | -1.236202 | 2.344407  |
| 44 | 6 | 0 | -3.870521 | -3.218059 | 0.245943  |
| 45 | 1 | 0 | -3.348723 | -3.612787 | -1.804443 |
| 46 | 1 | 0 | -4.104492 | -2.608800 | 2.295663  |
| 47 | 6 | 0 | -5.114852 | -4.067447 | 0.225987  |
| 48 | 1 | 0 | -5.564021 | -4.085859 | -0.769436 |
| 49 | 1 | 0 | -4.881805 | -5.100831 | 0.502266  |
| 50 | 1 | 0 | -5.857615 | -3.695902 | 0.935284  |
| 51 | 6 | 0 | 1.156286  | 0.555854  | 2.019356  |
| 52 | 6 | 0 | 1.909236  | 1.526468  | 1.368095  |
| 53 | 6 | 0 | 0.584124  | 0.797660  | 3.260361  |
| 54 | 6 | 0 | 2.043988  | 2.748114  | 2.026951  |
| 55 | 1 | 0 | 2.351481  | 1.349158  | 0.386398  |
| 56 | 6 | 0 | 0.799984  | 2.055837  | 3.819692  |
| 57 | 1 | 0 | 0.006726  | 0.038512  | 3.776227  |
| 58 | 7 | 0 | 1.509144  | 3.016649  | 3.221962  |
| 59 | 1 | 0 | 2.610345  | 3.549950  | 1.560574  |
| 60 | 1 | 0 | 0.381138  | 2.294898  | 4.793190  |

---

**Int7<sup>a</sup>**

---

| Center<br>Number | Atomic<br>Number | Atomic<br>Type | Coordinates (Angstroms) |          |           |
|------------------|------------------|----------------|-------------------------|----------|-----------|
|                  |                  |                | X                       | Y        | Z         |
| 1                | 6                | 0              | 0.426742                | 3.294943 | 0.336624  |
| 2                | 6                | 0              | -0.278490               | 2.157142 | -0.047543 |
| 3                | 6                | 0              | 1.520359                | 1.555535 | -1.527738 |
| 4                | 6                | 0              | 2.230925                | 2.687439 | -1.152962 |

|    |    |   |           |           |           |
|----|----|---|-----------|-----------|-----------|
| 5  | 6  | 0 | 1.663300  | 3.554654  | -0.230398 |
| 6  | 1  | 0 | 0.007309  | 3.959394  | 1.081626  |
| 7  | 1  | 0 | 3.213965  | 2.874831  | -1.566139 |
| 8  | 6  | 0 | 0.237297  | 1.279631  | -1.018307 |
| 9  | 6  | 0 | -0.449668 | -1.182791 | 1.434596  |
| 10 | 6  | 0 | 0.520104  | -1.276792 | 0.495966  |
| 11 | 6  | 0 | 0.006158  | -0.778180 | 2.833565  |
| 12 | 8  | 0 | -0.091460 | -1.492251 | 3.797459  |
| 13 | 8  | 0 | 0.486628  | 0.465529  | 2.886569  |
| 14 | 7  | 0 | 0.117770  | -1.484989 | -0.867589 |
| 15 | 16 | 0 | -0.639723 | -0.186380 | -1.610071 |
| 16 | 8  | 0 | -0.413946 | -0.329542 | -3.044751 |
| 17 | 8  | 0 | -2.006905 | -0.153596 | -1.151945 |
| 18 | 1  | 0 | 0.852206  | -1.826914 | -1.483113 |
| 19 | 6  | 0 | 0.818987  | 0.925847  | 4.209196  |
| 20 | 1  | 0 | 1.630100  | 0.320624  | 4.624146  |
| 21 | 1  | 0 | 1.123581  | 1.964161  | 4.091153  |
| 22 | 1  | 0 | -1.116793 | -1.313812 | 1.251683  |
| 23 | 6  | 0 | -3.769630 | -1.231683 | 0.847124  |
| 24 | 8  | 0 | -2.816030 | -2.008057 | 1.199985  |
| 25 | 8  | 0 | -4.540571 | -1.555742 | -0.170749 |
| 26 | 8  | 0 | -3.972849 | -0.094096 | 1.434732  |
| 27 | 19 | 0 | -2.597917 | -3.015401 | -1.190415 |
| 28 | 19 | 0 | -4.496659 | 0.963390  | -0.903237 |
| 29 | 1  | 0 | -0.057292 | 0.854746  | 4.852279  |
| 30 | 6  | 0 | 2.023786  | -1.179612 | 0.688485  |
| 31 | 1  | 0 | 2.252148  | -1.060448 | 1.751026  |
| 32 | 1  | 0 | 2.393392  | -0.278836 | 0.183058  |
| 33 | 6  | 0 | 2.803594  | -2.402549 | 0.145731  |
| 34 | 1  | 0 | 2.624298  | -2.538123 | -0.929653 |
| 35 | 1  | 0 | 2.440669  | -3.309322 | 0.645519  |
| 36 | 6  | 0 | 4.309232  | -2.259466 | 0.356811  |
| 37 | 1  | 0 | 4.521816  | -2.124481 | 1.427298  |
| 38 | 1  | 0 | 4.656864  | -1.344583 | -0.142983 |
| 39 | 6  | 0 | 5.111583  | -3.454343 | -0.164814 |
| 40 | 1  | 0 | 4.759731  | -4.365956 | 0.333790  |
| 41 | 1  | 0 | 4.902739  | -3.586347 | -1.233845 |
| 42 | 6  | 0 | 6.614291  | -3.295438 | 0.050654  |
| 43 | 1  | 0 | 6.845424  | -3.188500 | 1.115118  |
| 44 | 1  | 0 | 7.160743  | -4.157932 | -0.328639 |
| 45 | 1  | 0 | 6.988307  | -2.403350 | -0.461545 |
| 46 | 17 | 0 | -1.772604 | 1.897377  | 0.782202  |
| 47 | 17 | 0 | 2.362967  | 0.471899  | -2.600007 |
| 48 | 17 | 0 | 2.534259  | 4.975787  | 0.244308  |

---

**Int7<sup>b</sup>**

---

| Center<br>Number | Atomic<br>Number | Atomic<br>Type | Coordinates (Angstroms) |           |           |
|------------------|------------------|----------------|-------------------------|-----------|-----------|
|                  |                  |                | X                       | Y         | Z         |
| 1                | 6                | 0              | -0.358724               | 3.018281  | 0.377749  |
| 2                | 6                | 0              | -0.721483               | 1.738970  | -0.029383 |
| 3                | 6                | 0              | 0.451724                | 2.104055  | -2.148499 |
| 4                | 6                | 0              | 0.801514                | 3.383774  | -1.738919 |
| 5                | 6                | 0              | 0.396149                | 3.830162  | -0.475395 |
| 6                | 1                | 0              | -0.654849               | 3.384812  | 1.354086  |
| 7                | 1                | 0              | -1.341471               | 1.094635  | 0.611078  |
| 8                | 1                | 0              | 0.751378                | 1.726546  | -3.119950 |
| 9                | 1                | 0              | 1.381997                | 4.031155  | -2.385505 |
| 10               | 6                | 0              | -0.304968               | 1.310359  | -1.289622 |
| 11               | 6                | 0              | 0.199801                | -1.105465 | 1.257316  |
| 12               | 6                | 0              | 0.994390                | -0.996652 | 0.166657  |
| 13               | 6                | 0              | 0.804410                | -0.616803 | 2.571144  |
| 14               | 8                | 0              | 1.181308                | -1.336649 | 3.453374  |
| 15               | 8                | 0              | 0.792820                | 0.718895  | 2.661068  |
| 16               | 7                | 0              | 0.458879                | -1.348080 | -1.113798 |
| 17               | 16               | 0              | -0.692530               | -0.351498 | -1.799753 |
| 18               | 8                | 0              | -0.508425               | -0.463621 | -3.246683 |
| 19               | 8                | 0              | -1.994599               | -0.675967 | -1.226157 |
| 20               | 1                | 0              | 1.173049                | -1.522118 | -1.821758 |
| 21               | 6                | 0              | 1.232208                | 1.230822  | 3.929736  |
| 22               | 1                | 0              | 2.271146                | 0.950603  | 4.109381  |
| 23               | 1                | 0              | 1.139623                | 2.314223  | 3.860229  |
| 24               | 1                | 0              | -0.353091               | -1.307628 | 1.192301  |
| 25               | 6                | 0              | -3.048997               | -1.203019 | 1.303143  |
| 26               | 8                | 0              | -2.143577               | -2.055858 | 1.474601  |
| 27               | 8                | 0              | -4.180434               | -1.516717 | 0.713557  |
| 28               | 8                | 0              | -2.874355               | 0.049008  | 1.643423  |
| 29               | 19               | 0              | -2.819694               | -3.263583 | -0.759983 |
| 30               | 19               | 0              | -4.219529               | 0.806638  | -0.494453 |
| 31               | 1                | 0              | 0.610707                | 0.842846  | 4.731383  |
| 32               | 6                | 0              | 0.763821                | 5.155399  | -0.045079 |
| 33               | 7                | 0              | 1.057738                | 6.219661  | 0.301119  |
| 34               | 6                | 0              | 2.432235                | -0.504272 | 0.097786  |
| 35               | 1                | 0              | 2.717556                | -0.041993 | 1.044332  |
| 36               | 1                | 0              | 2.481064                | 0.276389  | -0.666979 |
| 37               | 6                | 0              | 3.433721                | -1.621095 | -0.242919 |

|    |   |   |          |           |           |
|----|---|---|----------|-----------|-----------|
| 38 | 1 | 0 | 3.150719 | -2.135943 | -1.172054 |
| 39 | 1 | 0 | 3.395570 | -2.383585 | 0.552634  |
| 40 | 6 | 0 | 4.871178 | -1.103133 | -0.383358 |
| 41 | 1 | 0 | 5.162695 | -0.589730 | 0.543009  |
| 42 | 1 | 0 | 4.906491 | -0.346859 | -1.179402 |
| 43 | 6 | 0 | 5.881087 | -2.206971 | -0.689508 |
| 44 | 1 | 0 | 5.843586 | -2.959851 | 0.107481  |
| 45 | 1 | 0 | 5.584416 | -2.719923 | -1.612952 |
| 46 | 6 | 0 | 7.304784 | -1.674875 | -0.830295 |
| 47 | 1 | 0 | 7.628642 | -1.181919 | 0.091734  |
| 48 | 1 | 0 | 8.014203 | -2.476912 | -1.049760 |
| 49 | 1 | 0 | 7.367003 | -0.939855 | -1.638998 |

---

### Int7<sup>c</sup>

| Center<br>Number | Atomic<br>Number | Atomic<br>Type | Coordinates (Angstroms) |           |           |
|------------------|------------------|----------------|-------------------------|-----------|-----------|
|                  |                  |                | X                       | Y         | Z         |
| 1                | 6                | 0              | 0.314208                | 0.848741  | -1.393307 |
| 2                | 6                | 0              | -0.544766               | 0.484854  | -0.419418 |
| 3                | 6                | 0              | 0.128742                | 2.228250  | -1.964418 |
| 4                | 8                | 0              | -0.390335               | 2.462775  | -3.030335 |
| 5                | 8                | 0              | 0.654399                | 3.173973  | -1.183947 |
| 6                | 7                | 0              | -0.386238               | -0.800428 | 0.224766  |
| 7                | 16               | 0              | 0.902108                | -1.028365 | 1.244886  |
| 8                | 8                | 0              | 0.512249                | -2.005494 | 2.259722  |
| 9                | 8                | 0              | 2.118988                | -1.313993 | 0.480029  |
| 10               | 6                | 0              | 0.578975                | 4.501654  | -1.717081 |
| 11               | 1                | 0              | -0.463584               | 4.798828  | -1.851260 |
| 12               | 1                | 0              | 1.065115                | 5.142884  | -0.982809 |
| 13               | 1                | 0              | 0.895186                | 0.399981  | -1.668281 |
| 14               | 6                | 0              | 3.332663                | -0.342815 | -1.855576 |
| 15               | 8                | 0              | 2.224100                | -0.532995 | -2.462987 |
| 16               | 8                | 0              | 4.190842                | -1.322249 | -1.760075 |
| 17               | 8                | 0              | 3.600988                | 0.792280  | -1.281242 |
| 18               | 19               | 0              | 2.186627                | -3.036884 | -1.664055 |
| 19               | 19               | 0              | 4.773359                | -0.509309 | 0.670235  |
| 20               | 1                | 0              | 1.090347                | 4.556093  | -2.680049 |
| 21               | 6                | 0              | -1.691969               | 1.313184  | 0.122494  |
| 22               | 1                | 0              | -1.377850               | 2.363714  | 0.163637  |
| 23               | 1                | 0              | -1.898118               | 1.001408  | 1.155137  |
| 24               | 6                | 0              | -2.981345               | 1.212949  | -0.707855 |
| 25               | 1                | 0              | -3.300029               | 0.164488  | -0.771022 |

|    |   |   |           |           |           |
|----|---|---|-----------|-----------|-----------|
| 26 | 1 | 0 | -2.760030 | 1.536930  | -1.737835 |
| 27 | 6 | 0 | -4.116766 | 2.056114  | -0.135219 |
| 28 | 1 | 0 | -3.793155 | 3.103795  | -0.061772 |
| 29 | 1 | 0 | -4.329639 | 1.726634  | 0.891544  |
| 30 | 6 | 0 | -5.397065 | 1.979218  | -0.964078 |
| 31 | 1 | 0 | -5.181586 | 2.305336  | -1.989207 |
| 32 | 1 | 0 | -5.716465 | 0.931823  | -1.034513 |
| 33 | 6 | 0 | -6.525979 | 2.824697  | -0.380460 |
| 34 | 1 | 0 | -6.234557 | 3.878435  | -0.326469 |
| 35 | 1 | 0 | -7.434003 | 2.757867  | -0.985379 |
| 36 | 1 | 0 | -6.772794 | 2.496720  | 0.634305  |
| 37 | 6 | 0 | -1.528890 | -1.668787 | 0.301634  |
| 38 | 6 | 0 | -1.895683 | -2.342545 | -0.862689 |
| 39 | 6 | 0 | -2.328602 | -1.764843 | 1.440129  |
| 40 | 6 | 0 | -3.058381 | -3.105727 | -0.887605 |
| 41 | 1 | 0 | -1.280003 | -2.233527 | -1.750487 |
| 42 | 6 | 0 | -3.481799 | -2.541569 | 1.407277  |
| 43 | 1 | 0 | -2.048232 | -1.234006 | 2.343966  |
| 44 | 6 | 0 | -3.866880 | -3.221104 | 0.246950  |
| 45 | 1 | 0 | -3.343681 | -3.617057 | -1.802779 |
| 46 | 1 | 0 | -4.102662 | -2.610508 | 2.296070  |
| 47 | 6 | 0 | -5.109725 | -4.072658 | 0.227302  |
| 48 | 1 | 0 | -5.558028 | -4.093492 | -0.768483 |
| 49 | 1 | 0 | -4.875177 | -5.105203 | 0.505514  |
| 50 | 1 | 0 | -5.853783 | -3.701234 | 0.935339  |
| 51 | 6 | 0 | 1.159354  | 0.557620  | 2.016156  |
| 52 | 6 | 0 | 1.910253  | 1.529460  | 1.364530  |
| 53 | 6 | 0 | 0.589860  | 0.797706  | 3.258797  |
| 54 | 6 | 0 | 2.046075  | 2.750317  | 2.024707  |
| 55 | 1 | 0 | 2.368766  | 1.347580  | 0.381614  |
| 56 | 6 | 0 | 0.806444  | 2.055193  | 3.819271  |
| 57 | 1 | 0 | 0.013928  | 0.037681  | 3.774973  |
| 58 | 7 | 0 | 1.513905  | 3.017112  | 3.221244  |
| 59 | 1 | 0 | 2.611053  | 3.552929  | 1.558004  |
| 60 | 1 | 0 | 0.389664  | 2.292799  | 4.794007  |

---

### R3

| Center<br>Number | Atomic<br>Number | Atomic<br>Type | Coordinates (Angstroms) |          |          |
|------------------|------------------|----------------|-------------------------|----------|----------|
|                  |                  |                | X                       | Y        | Z        |
| 1                | 6                | 0              | -1.399632               | 1.653913 | 0.300355 |
| 2                | 1                | 0              | -1.771525               | 2.634690 | 0.583315 |

|    |   |   |           |           |           |
|----|---|---|-----------|-----------|-----------|
| 3  | 6 | 0 | -0.036946 | 1.577742  | 0.077021  |
| 4  | 6 | 0 | -2.428352 | 0.666515  | 0.043708  |
| 5  | 6 | 0 | -3.748876 | 0.918837  | 0.478256  |
| 6  | 6 | 0 | -2.226480 | -0.502586 | -0.724936 |
| 7  | 6 | 0 | -4.792700 | 0.047791  | 0.192937  |
| 8  | 1 | 0 | -3.943791 | 1.823470  | 1.050072  |
| 9  | 6 | 0 | -3.273683 | -1.370507 | -1.009572 |
| 10 | 1 | 0 | -1.234523 | -0.705944 | -1.116628 |
| 11 | 6 | 0 | -4.565462 | -1.112391 | -0.548661 |
| 12 | 1 | 0 | -5.792701 | 0.276255  | 0.551070  |
| 13 | 1 | 0 | -3.080246 | -2.257252 | -1.607116 |
| 14 | 1 | 0 | -5.378581 | -1.795880 | -0.769968 |
| 15 | 6 | 0 | 0.829019  | 0.452589  | 0.092718  |
| 16 | 6 | 0 | 2.135354  | 0.518013  | -0.476012 |
| 17 | 6 | 0 | 0.448285  | -0.785861 | 0.878638  |
| 18 | 1 | 0 | -0.605840 | -0.725920 | 1.152685  |
| 19 | 1 | 0 | 0.553875  | -1.692523 | 0.269444  |
| 20 | 6 | 0 | 1.266670  | -0.943762 | 2.166505  |
| 21 | 1 | 0 | 0.972330  | -1.843180 | 2.718004  |
| 22 | 1 | 0 | 2.334170  | -1.013446 | 1.943700  |
| 23 | 1 | 0 | 1.110924  | -0.080022 | 2.820638  |
| 24 | 8 | 0 | 2.770177  | -0.699157 | -0.460925 |
| 25 | 8 | 0 | 2.734204  | 1.499189  | -0.960782 |
| 26 | 6 | 0 | 4.137698  | -0.708625 | -0.868148 |
| 27 | 1 | 0 | 4.349203  | -1.750267 | -1.120959 |
| 28 | 1 | 0 | 4.258857  | -0.094763 | -1.763086 |
| 29 | 6 | 0 | 5.048852  | -0.223388 | 0.246210  |
| 30 | 1 | 0 | 6.095278  | -0.279892 | -0.065643 |
| 31 | 1 | 0 | 4.813633  | 0.813797  | 0.493386  |
| 32 | 1 | 0 | 4.921405  | -0.839061 | 1.140617  |

I

| Center<br>Number | Atomic<br>Number | Atomic<br>Type | Coordinates (Angstroms) |          |           |
|------------------|------------------|----------------|-------------------------|----------|-----------|
|                  |                  |                | X                       | Y        | Z         |
| 1                | 6                | 0              | -3.415089               | 1.025872 | -0.074444 |
| 2                | 6                | 0              | -2.309648               | 1.806998 | -0.509845 |
| 3                | 6                | 0              | -0.981092               | 1.002245 | 1.330258  |
| 4                | 6                | 0              | -2.061052               | 0.204870 | 1.779062  |
| 5                | 6                | 0              | -3.219510               | 0.328753 | 1.080199  |
| 6                | 1                | 0              | -4.343716               | 0.944744 | -0.649239 |
| 7                | 1                | 0              | -2.364114               | 2.362675 | -1.440623 |

|    |    |   |           |           |           |
|----|----|---|-----------|-----------|-----------|
| 8  | 1  | 0 | -0.011070 | 0.925946  | 1.817414  |
| 9  | 1  | 0 | -1.965303 | -0.506033 | 2.612844  |
| 10 | 7  | 0 | -4.404335 | -0.471137 | 1.593677  |
| 11 | 8  | 0 | -5.432477 | -0.380303 | 0.980151  |
| 12 | 8  | 0 | -4.225011 | -1.123008 | 2.586096  |
| 13 | 6  | 0 | -1.234992 | 1.937891  | 0.352305  |
| 14 | 6  | 0 | 0.331057  | -0.086677 | -1.845420 |
| 15 | 6  | 0 | 1.332783  | 0.321690  | -0.984476 |
| 16 | 7  | 0 | 1.526763  | 1.719768  | -0.650890 |
| 17 | 16 | 0 | 0.270269  | 2.728038  | -0.394509 |
| 18 | 8  | 0 | 0.634538  | 3.628197  | 0.706439  |
| 19 | 8  | 0 | -0.155359 | 3.349865  | -1.652640 |
| 20 | 1  | 0 | 2.329336  | 1.882881  | -0.016807 |
| 21 | 6  | 0 | -0.735907 | -0.960003 | -1.437643 |
| 22 | 6  | 0 | -1.931902 | -1.082541 | -2.237657 |
| 23 | 6  | 0 | -0.718050 | -1.828267 | -0.275427 |
| 24 | 6  | 0 | -2.925652 | -2.008409 | -1.965122 |
| 25 | 1  | 0 | -2.006821 | -0.437838 | -3.106208 |
| 26 | 6  | 0 | -1.731350 | -2.735437 | -0.018096 |
| 27 | 1  | 0 | 0.109262  | -1.733293 | 0.409318  |
| 28 | 6  | 0 | -2.843509 | -2.871126 | -0.862485 |
| 29 | 1  | 0 | -3.780658 | -2.072884 | -2.635949 |
| 30 | 1  | 0 | -1.657073 | -3.367986 | 0.867656  |
| 31 | 1  | 0 | -3.615695 | -3.604519 | -0.673046 |
| 32 | 6  | 0 | 2.370308  | -0.561711 | -0.516788 |
| 33 | 6  | 0 | 3.541836  | -0.097884 | 0.091193  |
| 34 | 8  | 0 | 3.790311  | 1.033537  | 0.590528  |
| 35 | 8  | 0 | 4.554175  | -1.031766 | 0.061573  |
| 36 | 6  | 0 | 5.776151  | -0.693545 | 0.691447  |
| 37 | 1  | 0 | 6.518873  | -1.365676 | 0.256678  |
| 38 | 1  | 0 | 6.054476  | 0.339177  | 0.439220  |
| 39 | 6  | 0 | 5.697896  | -0.880064 | 2.195446  |
| 40 | 1  | 0 | 6.659826  | -0.679196 | 2.656861  |
| 41 | 1  | 0 | 4.960524  | -0.181443 | 2.612907  |
| 42 | 1  | 0 | 5.393060  | -1.900633 | 2.430454  |
| 43 | 6  | 0 | 2.377907  | -1.952819 | -1.123146 |
| 44 | 1  | 0 | 1.485643  | -2.048586 | -1.746031 |
| 45 | 1  | 0 | 3.235404  | -2.082517 | -1.790857 |
| 46 | 6  | 0 | 2.418723  | -3.111721 | -0.117138 |
| 47 | 1  | 0 | 2.348757  | -4.078199 | -0.616174 |
| 48 | 1  | 0 | 3.351521  | -3.084968 | 0.440950  |
| 49 | 1  | 0 | 1.592548  | -3.049162 | 0.606828  |
| 50 | 1  | 0 | -0.238957 | 0.987626  | -2.254073 |

---



**TS1A**

---

| Center<br>Number | Atomic<br>Number | Atomic<br>Type | Coordinates (Angstroms) |           |           |
|------------------|------------------|----------------|-------------------------|-----------|-----------|
|                  |                  |                | X                       | Y         | Z         |
| 1                | 6                | 0              | -3.231350               | 1.091272  | 0.313646  |
| 2                | 6                | 0              | -2.206071               | 1.832067  | -0.237232 |
| 3                | 6                | 0              | -0.626702               | 0.796441  | 1.313734  |
| 4                | 6                | 0              | -1.650977               | 0.054418  | 1.859735  |
| 5                | 6                | 0              | -2.945310               | 0.188153  | 1.341157  |
| 6                | 1                | 0              | -4.249028               | 1.192104  | -0.042071 |
| 7                | 1                | 0              | -2.394535               | 2.527220  | -1.047372 |
| 8                | 1                | 0              | 0.385281                | 0.704887  | 1.697982  |
| 9                | 1                | 0              | -1.472224               | -0.629440 | 2.680049  |
| 10               | 7                | 0              | -3.996668               | -0.636759 | 1.864734  |
| 11               | 8                | 0              | -5.136683               | -0.484121 | 1.432832  |
| 12               | 8                | 0              | -3.716259               | -1.467461 | 2.725657  |
| 13               | 6                | 0              | -0.882662               | 1.603438  | 0.184019  |
| 14               | 6                | 0              | 0.016709                | 0.364941  | -1.648836 |
| 15               | 6                | 0              | 1.303112                | 0.459502  | -1.061418 |
| 16               | 7                | 0              | 1.631032                | 1.803580  | -0.741583 |
| 17               | 16               | 0              | 0.373374                | 2.786780  | -0.279544 |
| 18               | 8                | 0              | 0.845709                | 3.548548  | 0.879806  |
| 19               | 8                | 0              | -0.132893               | 3.554140  | -1.416819 |
| 20               | 1                | 0              | 2.452632                | 1.896582  | -0.130035 |
| 21               | 6                | 0              | -0.937984               | -0.710977 | -1.588222 |
| 22               | 6                | 0              | -2.106009               | -0.642653 | -2.380426 |
| 23               | 6                | 0              | -0.882067               | -1.734350 | -0.617236 |
| 24               | 6                | 0              | -3.152076               | -1.539841 | -2.209841 |
| 25               | 1                | 0              | -2.186605               | 0.145443  | -3.125661 |
| 26               | 6                | 0              | -1.931109               | -2.626869 | -0.445496 |
| 27               | 1                | 0              | -0.024546               | -1.774545 | 0.042123  |
| 28               | 6                | 0              | -3.078944               | -2.535362 | -1.233933 |
| 29               | 1                | 0              | -4.037875               | -1.454369 | -2.832766 |
| 30               | 1                | 0              | -1.863035               | -3.386961 | 0.328410  |
| 31               | 1                | 0              | -3.900196               | -3.231129 | -1.094962 |
| 32               | 6                | 0              | 2.230610                | -0.539704 | -0.741693 |
| 33               | 6                | 0              | 3.409663                | -0.205037 | 0.026969  |
| 34               | 8                | 0              | 3.647594                | 0.849933  | 0.634352  |
| 35               | 8                | 0              | 4.328668                | -1.200548 | 0.033405  |
| 36               | 6                | 0              | 5.511896                | -0.982386 | 0.810967  |
| 37               | 1                | 0              | 6.242468                | -1.683321 | 0.402966  |
| 38               | 1                | 0              | 5.865673                | 0.038091  | 0.651403  |

|    |   |   |           |           |           |
|----|---|---|-----------|-----------|-----------|
| 39 | 6 | 0 | 5.257156  | -1.250041 | 2.283107  |
| 40 | 1 | 0 | 6.185890  | -1.144512 | 2.849621  |
| 41 | 1 | 0 | 4.526881  | -0.539403 | 2.674550  |
| 42 | 1 | 0 | 4.878089  | -2.265114 | 2.426090  |
| 43 | 6 | 0 | 2.179856  | -1.896095 | -1.422470 |
| 44 | 1 | 0 | 1.294194  | -1.921507 | -2.060391 |
| 45 | 1 | 0 | 3.042850  | -1.974100 | -2.097412 |
| 46 | 6 | 0 | 2.191603  | -3.138762 | -0.520325 |
| 47 | 1 | 0 | 2.023139  | -4.038679 | -1.119802 |
| 48 | 1 | 0 | 3.152072  | -3.242486 | -0.014834 |
| 49 | 1 | 0 | 1.414532  | -3.103009 | 0.246759  |
| 50 | 1 | 0 | -0.255350 | 1.195153  | -2.295103 |

---

## II

| Center<br>Number | Atomic<br>Number | Atomic<br>Type | Coordinates (Angstroms) |           |           |
|------------------|------------------|----------------|-------------------------|-----------|-----------|
|                  |                  |                | X                       | Y         | Z         |
| 1                | 6                | 0              | -3.345224               | 1.157771  | -0.049847 |
| 2                | 6                | 0              | -2.276306               | 1.699053  | -0.636304 |
| 3                | 6                | 0              | -0.864836               | 0.801728  | 1.217548  |
| 4                | 6                | 0              | -1.968282               | 0.284164  | 1.777292  |
| 5                | 6                | 0              | -3.270121               | 0.274337  | 1.107497  |
| 6                | 1                | 0              | -4.356269               | 1.396764  | -0.418599 |
| 7                | 1                | 0              | -2.390475               | 2.355109  | -1.493857 |
| 8                | 1                | 0              | 0.067790                | 0.805524  | 1.777858  |
| 9                | 1                | 0              | -1.932719               | -0.126570 | 2.797098  |
| 10               | 7                | 0              | -4.298975               | -0.385838 | 1.571176  |
| 11               | 8                | 0              | -5.429934               | -0.331923 | 0.985756  |
| 12               | 8                | 0              | -4.200160               | -1.120784 | 2.607965  |
| 13               | 6                | 0              | -0.779356               | 1.143355  | -0.363124 |
| 14               | 6                | 0              | -0.236402               | 0.506295  | -1.042535 |
| 15               | 6                | 0              | 1.391202                | 0.467785  | -0.743028 |
| 16               | 7                | 0              | 1.639718                | 1.776930  | -0.481048 |
| 17               | 16               | 0              | 0.253806                | 2.752466  | -0.335350 |
| 18               | 8                | 0              | 0.512860                | 3.585204  | 0.842619  |
| 19               | 8                | 0              | -0.013107               | 3.444856  | -1.597269 |
| 20               | 1                | 0              | 2.487679                | 2.059542  | 0.012416  |
| 21               | 6                | 0              | -0.912547               | -0.903540 | -1.231710 |
| 22               | 6                | 0              | -1.914677               | -1.017347 | -2.187588 |
| 23               | 6                | 0              | -0.816486               | -1.816469 | -0.208975 |
| 24               | 6                | 0              | -2.896000               | -1.998950 | -2.049629 |
| 25               | 1                | 0              | -1.988224               | -0.293553 | -3.001143 |

|    |   |   |           |           |           |
|----|---|---|-----------|-----------|-----------|
| 26 | 6 | 0 | -1.777382 | -2.819151 | -0.066043 |
| 27 | 1 | 0 | -0.024086 | -1.704277 | 0.533047  |
| 28 | 6 | 0 | -2.835528 | -2.866021 | -0.966248 |
| 29 | 1 | 0 | -3.715603 | -2.060824 | -2.756784 |
| 30 | 1 | 0 | -1.724185 | -3.511083 | 0.765150  |
| 31 | 1 | 0 | -3.613637 | -3.615893 | -0.828228 |
| 32 | 6 | 0 | 2.321910  | -0.512306 | -0.681053 |
| 33 | 6 | 0 | 3.621262  | -0.113643 | 0.009274  |
| 34 | 8 | 0 | 3.823062  | 0.944436  | 0.551216  |
| 35 | 8 | 0 | 4.524550  | -1.075757 | -0.026498 |
| 36 | 6 | 0 | 5.793239  | -0.782911 | 0.623005  |
| 37 | 1 | 0 | 6.486924  | -1.492163 | 0.169198  |
| 38 | 1 | 0 | 6.079683  | 0.232540  | 0.371385  |
| 39 | 6 | 0 | 5.682004  | -0.981109 | 2.123277  |
| 40 | 1 | 0 | 6.668353  | -0.819306 | 2.582993  |
| 41 | 1 | 0 | 4.973661  | -0.284969 | 2.560109  |
| 42 | 1 | 0 | 5.368987  | -2.003790 | 2.357974  |
| 43 | 6 | 0 | 2.232983  | -1.930281 | -1.217473 |
| 44 | 1 | 0 | 1.316205  | -2.044412 | -1.797148 |
| 45 | 1 | 0 | 3.065416  | -2.013088 | -1.932647 |
| 46 | 6 | 0 | 2.348950  | -3.071622 | -0.196949 |
| 47 | 1 | 0 | 2.286969  | -4.026310 | -0.736389 |
| 48 | 1 | 0 | 3.305203  | -3.045584 | 0.336081  |
| 49 | 1 | 0 | 1.547442  | -3.057188 | 0.532828  |
| 50 | 1 | 0 | -0.083779 | 0.777330  | -2.311283 |

## TS1C

| Center<br>Number | Atomic<br>Number | Atomic<br>Type | Coordinates (Angstroms) |           |          |
|------------------|------------------|----------------|-------------------------|-----------|----------|
|                  |                  |                | X                       | Y         | Z        |
| 1                | 6                | 0              | 1.169569                | -0.026891 | 1.913924 |
| 2                | 6                | 0              | 0.073695                | -0.757320 | 1.587973 |
| 3                | 6                | 0              | -1.291258               | -0.307047 | 1.272313 |
| 4                | 6                | 0              | -2.310873               | -1.337200 | 1.098614 |
| 5                | 6                | 0              | -1.825053               | 0.940180  | 1.997987 |
| 6                | 1                | 0              | -1.333631               | 1.844861  | 1.637834 |
| 7                | 1                | 0              | -2.875274               | 1.055534  | 1.722525 |
| 8                | 6                | 0              | -1.704260               | 0.853146  | 3.521717 |
| 9                | 1                | 0              | -2.137199               | 1.737589  | 3.999886 |
| 10               | 1                | 0              | -2.229679               | -0.029482 | 3.903906 |
| 11               | 1                | 0              | -0.657975               | 0.781063  | 3.832627 |
| 12               | 8                | 0              | -3.435916               | -0.832045 | 0.499767 |

|    |    |   |           |           |           |
|----|----|---|-----------|-----------|-----------|
| 13 | 8  | 0 | -2.269239 | -2.541461 | 1.356325  |
| 14 | 6  | 0 | -4.624011 | -1.633456 | 0.589737  |
| 15 | 1  | 0 | -5.295800 | -1.217890 | -0.164003 |
| 16 | 1  | 0 | -4.387876 | -2.667694 | 0.329401  |
| 17 | 6  | 0 | -5.228690 | -1.541291 | 1.978463  |
| 18 | 1  | 0 | -6.162223 | -2.107631 | 2.022449  |
| 19 | 1  | 0 | -4.539084 | -1.953006 | 2.719229  |
| 20 | 1  | 0 | -5.440460 | -0.499616 | 2.232420  |
| 21 | 7  | 0 | 0.369647  | -2.182709 | 1.479779  |
| 22 | 16 | 0 | 0.740946  | -2.738824 | -0.048690 |
| 23 | 8  | 0 | -0.290730 | -2.418404 | -1.042314 |
| 24 | 8  | 0 | 1.110611  | -4.143629 | 0.105028  |
| 25 | 6  | 0 | 2.180808  | -1.789179 | -0.488328 |
| 26 | 6  | 0 | 2.002106  | -0.560803 | -1.121738 |
| 27 | 6  | 0 | 3.432974  | -2.302252 | -0.169650 |
| 28 | 6  | 0 | 3.128523  | 0.190513  | -1.433188 |
| 29 | 1  | 0 | 1.000895  | -0.193712 | -1.342819 |
| 30 | 6  | 0 | 4.561230  | -1.554487 | -0.487410 |
| 31 | 1  | 0 | 3.521394  | -3.267631 | 0.315877  |
| 32 | 6  | 0 | 4.377007  | -0.325828 | -1.107116 |
| 33 | 1  | 0 | 3.048551  | 1.158222  | -1.911436 |
| 34 | 1  | 0 | 5.559138  | -1.907943 | -0.263622 |
| 35 | 7  | 0 | 5.569864  | 0.471911  | -1.437932 |
| 36 | 8  | 0 | 5.400395  | 1.546993  | -1.983804 |
| 37 | 8  | 0 | 6.659432  | 0.012279  | -1.147211 |
| 38 | 1  | 0 | -1.178330 | 0.159859  | -0.090269 |
| 39 | 6  | 0 | -2.007233 | 1.389125  | -1.575250 |
| 40 | 8  | 0 | -1.114239 | 0.434860  | -1.231668 |
| 41 | 8  | 0 | -2.687067 | 1.156921  | -2.627508 |
| 42 | 8  | 0 | -2.114952 | 2.415480  | -0.857795 |
| 43 | 19 | 0 | -2.477663 | -1.509067 | -2.292972 |
| 44 | 19 | 0 | -4.020546 | 3.418622  | -2.355432 |
| 45 | 1  | 0 | 2.041669  | -0.612430 | 2.197251  |
| 46 | 6  | 0 | 1.386638  | 1.425043  | 1.886939  |
| 47 | 6  | 0 | 2.240226  | 2.004141  | 2.841037  |
| 48 | 6  | 0 | 0.858754  | 2.252316  | 0.881796  |
| 49 | 6  | 0 | 2.529287  | 3.363971  | 2.817700  |
| 50 | 1  | 0 | 2.674991  | 1.371675  | 3.610949  |
| 51 | 6  | 0 | 1.149741  | 3.614536  | 0.861153  |
| 52 | 1  | 0 | 0.216424  | 1.829663  | 0.113453  |
| 53 | 6  | 0 | 1.980727  | 4.178617  | 1.826992  |
| 54 | 1  | 0 | 3.185053  | 3.788993  | 3.571386  |
| 55 | 1  | 0 | 0.725482  | 4.235786  | 0.077560  |
| 56 | 1  | 0 | 2.206464  | 5.240010  | 1.804580  |

|    |   |   |           |           |          |
|----|---|---|-----------|-----------|----------|
| 57 | 1 | 0 | -0.454100 | -2.733966 | 1.758049 |
|----|---|---|-----------|-----------|----------|

---

## VI

---

| Center<br>Number | Atomic<br>Number | Atomic<br>Type | Coordinates (Angstroms) |           |           |
|------------------|------------------|----------------|-------------------------|-----------|-----------|
|                  |                  |                | X                       | Y         | Z         |
| 1                | 6                | 0              | 0.717478                | 0.460343  | 2.038386  |
| 2                | 6                | 0              | -0.136944               | -0.474101 | 1.594713  |
| 3                | 6                | 0              | -1.426340               | -0.310708 | 0.804646  |
| 4                | 6                | 0              | -2.371055               | -1.466956 | 1.075927  |
| 5                | 6                | 0              | -2.278595               | 0.962195  | 1.065570  |
| 6                | 1                | 0              | -1.800497               | 1.805177  | 0.563306  |
| 7                | 1                | 0              | -3.220403               | 0.792211  | 0.529286  |
| 8                | 6                | 0              | -2.560162               | 1.271642  | 2.531571  |
| 9                | 1                | 0              | -3.206879               | 2.149858  | 2.610293  |
| 10               | 1                | 0              | -3.060907               | 0.433516  | 3.022884  |
| 11               | 1                | 0              | -1.638274               | 1.484554  | 3.078571  |
| 12               | 8                | 0              | -2.965386               | -1.893278 | -0.054693 |
| 13               | 8                | 0              | -2.656169               | -1.896214 | 2.169434  |
| 14               | 6                | 0              | -4.026202               | -2.856614 | 0.109135  |
| 15               | 1                | 0              | -4.108901               | -3.349730 | -0.860807 |
| 16               | 1                | 0              | -3.722387               | -3.586937 | 0.861093  |
| 17               | 6                | 0              | -5.316578               | -2.160519 | 0.495170  |
| 18               | 1                | 0              | -6.124404               | -2.891863 | 0.574093  |
| 19               | 1                | 0              | -5.203969               | -1.661061 | 1.460019  |
| 20               | 1                | 0              | -5.591060               | -1.419895 | -0.260043 |
| 21               | 7                | 0              | 0.228970                | -1.855849 | 1.831444  |
| 22               | 16               | 0              | 0.890328                | -2.707292 | 0.561832  |
| 23               | 8                | 0              | -0.088296               | -2.669335 | -0.521568 |
| 24               | 8                | 0              | 1.323165                | -3.982970 | 1.111812  |
| 25               | 6                | 0              | 2.322008                | -1.803384 | 0.012688  |
| 26               | 6                | 0              | 2.130257                | -0.672747 | -0.780578 |
| 27               | 6                | 0              | 3.576981                | -2.218077 | 0.452309  |
| 28               | 6                | 0              | 3.249466                | 0.067378  | -1.147987 |
| 29               | 1                | 0              | 1.141799                | -0.356139 | -1.122491 |
| 30               | 6                | 0              | 4.693560                | -1.481989 | 0.075832  |
| 31               | 1                | 0              | 3.675719                | -3.105194 | 1.067286  |
| 32               | 6                | 0              | 4.498376                | -0.355333 | -0.713020 |
| 33               | 1                | 0              | 3.154597                | 0.955348  | -1.760047 |
| 34               | 1                | 0              | 5.691391                | -1.767997 | 0.381448  |
| 35               | 7                | 0              | 5.680488                | 0.429215  | -1.109394 |
| 36               | 8                | 0              | 5.502096                | 1.411424  | -1.806032 |

|    |    |   |           |           |           |
|----|----|---|-----------|-----------|-----------|
| 37 | 8  | 0 | 6.769401  | 0.054050  | -0.714095 |
| 38 | 1  | 0 | -1.172200 | -0.291756 | -0.259868 |
| 39 | 6  | 0 | -1.342385 | 1.347289  | -2.163956 |
| 40 | 8  | 0 | -0.306357 | 0.563358  | -2.142285 |
| 41 | 8  | 0 | -2.523504 | 0.821833  | -2.305319 |
| 42 | 8  | 0 | -1.209552 | 2.616715  | -2.032712 |
| 43 | 19 | 0 | -1.656829 | -1.632153 | -2.468397 |
| 44 | 19 | 0 | -3.728301 | 3.008313  | -1.647866 |
| 45 | 1  | 0 | 1.584089  | 0.093788  | 2.590509  |
| 46 | 6  | 0 | 0.687264  | 1.922011  | 1.840974  |
| 47 | 6  | 0 | 0.960583  | 2.779804  | 2.915179  |
| 48 | 6  | 0 | 0.477640  | 2.462813  | 0.567650  |
| 49 | 6  | 0 | 0.981669  | 4.158118  | 2.727701  |
| 50 | 1  | 0 | 1.147008  | 2.360889  | 3.900624  |
| 51 | 6  | 0 | 0.495802  | 3.843454  | 0.385101  |
| 52 | 1  | 0 | 0.289694  | 1.816675  | -0.289402 |
| 53 | 6  | 0 | 0.745897  | 4.693594  | 1.460258  |
| 54 | 1  | 0 | 1.184148  | 4.814158  | 3.568300  |
| 55 | 1  | 0 | 0.299885  | 4.230037  | -0.609356 |
| 56 | 1  | 0 | 0.764560  | 5.769280  | 1.314306  |
| 57 | 1  | 0 | -0.612480 | -2.332806 | 2.085359  |

---
